# Supplementary material for: Organocatalyzed asymmetric tandem Michael-cyclization reaction of 4-benzylidene-3-methylpyrazol-5-ones and malononitrile: stereocontrolled construction of pyrano[2,3-c]pyrazole scaffold
Source: Royal Society of Chemistry journal article supplement (doi:10.1039/c5ra04356e), 2015-01-01
Supplement: c5ra04356e1.pdf [file c5ra04356e1.pdf]

## Table of Contents

- |                                                             |                   |
|-------------------------------------------------------------|-------------------|
| 1. Crystallography data of Compound <b>10</b>               | Page 1 – Page 2   |
| 2. Copies of <sup>1</sup> H and <sup>13</sup> C NMR Spectra | Page 2 – Page 19  |
| 3. Copies of HRMS spectra                                   | Page 19 – Page 28 |
| 4. Copies of HPLC data                                      | Page 29 – Page 46 |

### 1. Crystallography data of Compound **10**

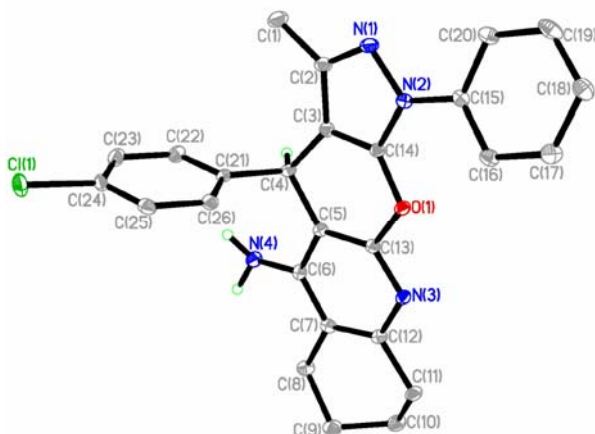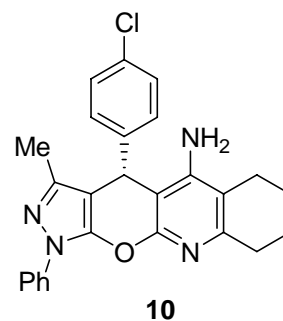

|                                   |                                                                                                                       |
|-----------------------------------|-----------------------------------------------------------------------------------------------------------------------|
| Identification code               | shelxl                                                                                                                |
| Empirical formula                 | C <sub>26</sub> H <sub>23</sub> Cl N <sub>4</sub> O                                                                   |
| Formula weight                    | 442.93                                                                                                                |
| Temperature                       | 113(2) K                                                                                                              |
| Wavelength                        | 0.71073 Å                                                                                                             |
| Crystal system, space group       | Monoclinic, P2(1)                                                                                                     |
| Unit cell dimensions              | a = 8.1418(16) Å    alpha = 90 deg.<br>b = 12.894(3) Å    beta = 105.75(3) deg.<br>c = 10.541(2) Å    gamma = 90 deg. |
| Volume                            | 1065.1(4) Å <sup>3</sup>                                                                                              |
| Z, Calculated density             | 2, 1.381 Mg/m <sup>3</sup>                                                                                            |
| Absorption coefficient            | 0.207 mm <sup>-1</sup>                                                                                                |
| F(000)                            | 464                                                                                                                   |
| Crystal size                      | 0.20 x 0.18 x 0.12 mm                                                                                                 |
| Theta range for data collection   | 2.01 to 28.10 deg.                                                                                                    |
| Limiting indices                  | -9 ≤ h ≤ 10, -16 ≤ k ≤ 16, -13 ≤ l ≤ 13                                                                               |
| Reflections collected / unique    | 10819 / 4910 [R(int) = 0.0301]                                                                                        |
| Completeness to theta = 28.10     | 99.1 %                                                                                                                |
| Absorption correction             | Semi-empirical from equivalents                                                                                       |
| Max. and min. transmission        | 0.9756 and 0.9598                                                                                                     |
| Refinement method                 | Full-matrix least-squares on F <sup>2</sup>                                                                           |
| Data / restraints / parameters    | 4910 / 4 / 296                                                                                                        |
| Goodness-of-fit on F <sup>2</sup> | 1.043                                                                                                                 |
| Final R indices [I > 2σ(I)]       | R1 = 0.0312, wR2 = 0.0797                                                                                             |

R indices (all data) R1 = 0.0414, wR2 = 0.0828  
Absolute structure parameter -0.01(5)  
Largest diff. peak and hole 0.209 and -0.296 e.A<sup>-3</sup>

## 2. Copies of <sup>1</sup>H and <sup>13</sup>C NMR Spectra

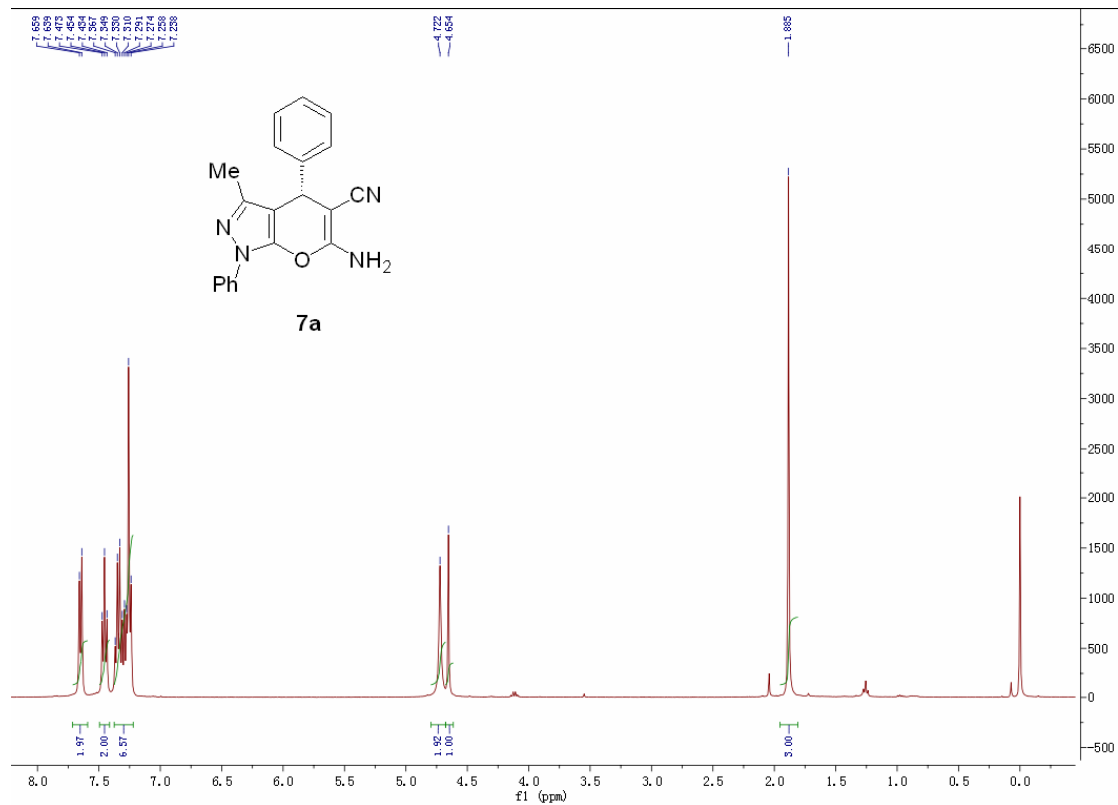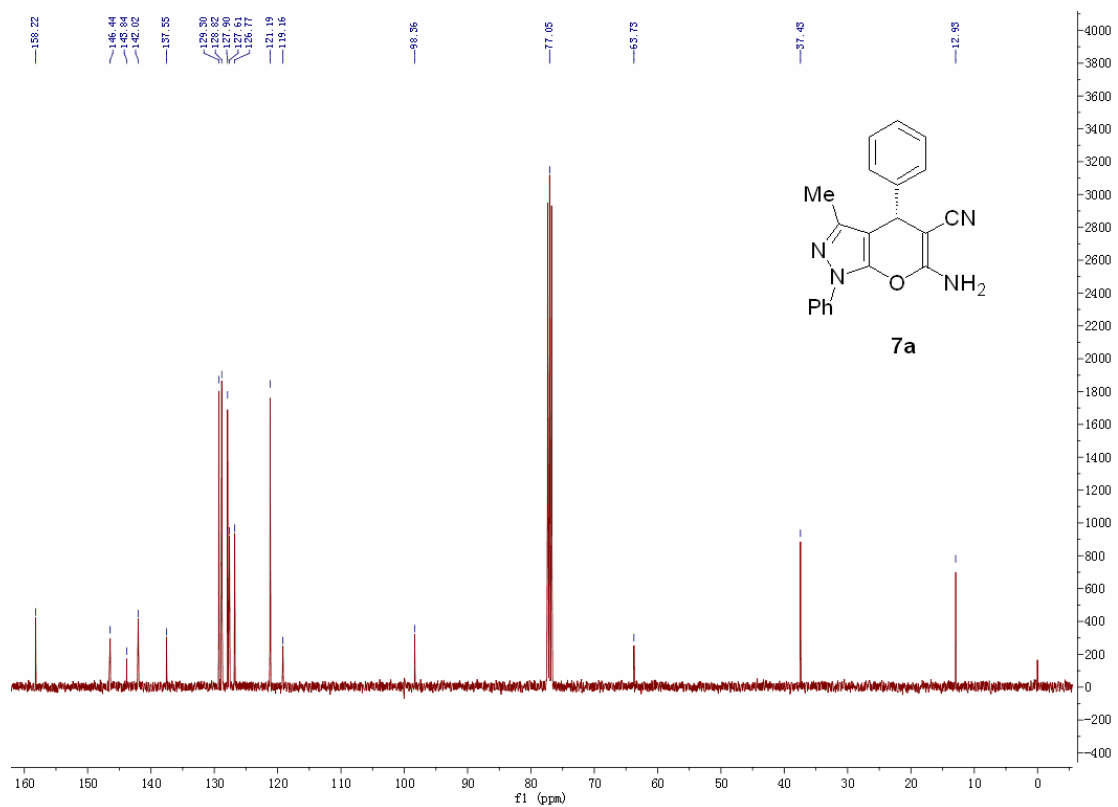

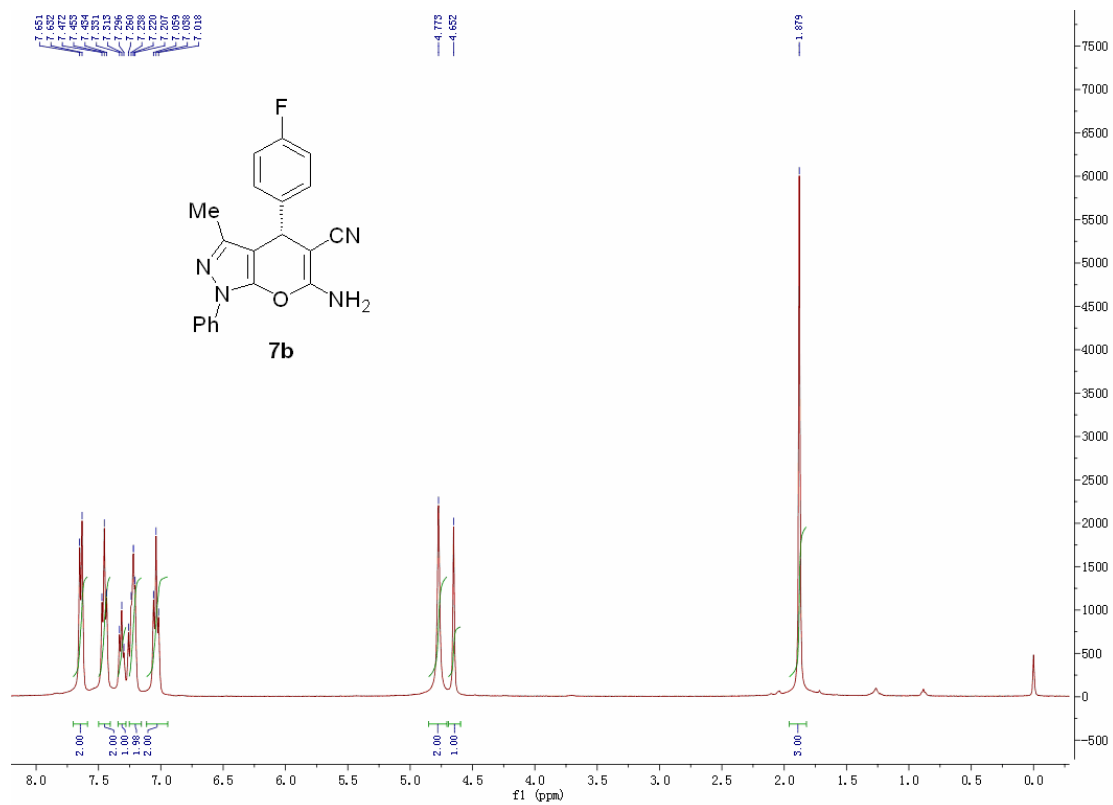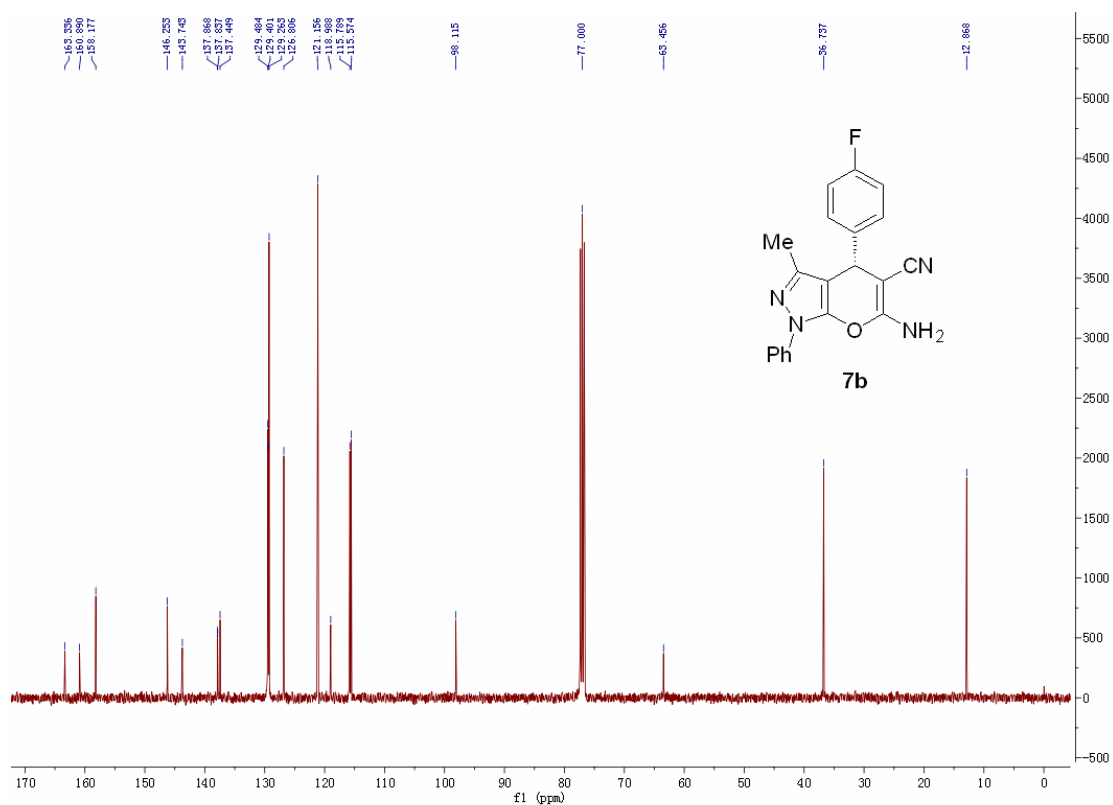

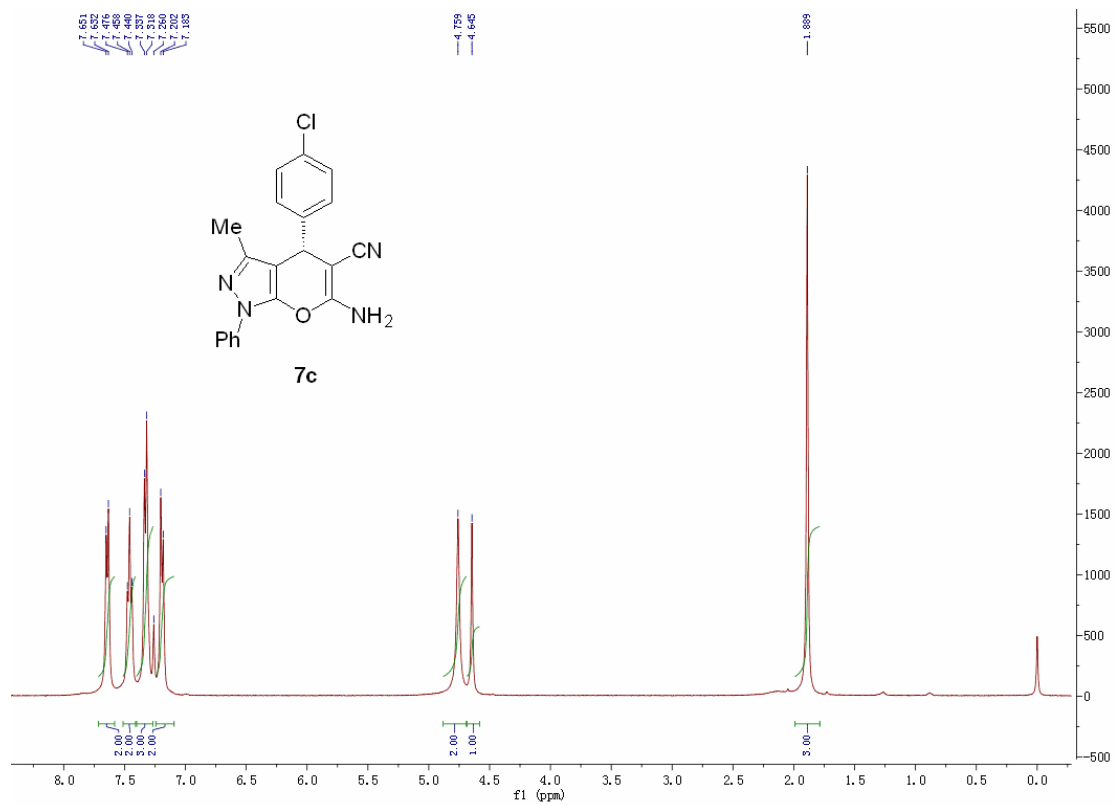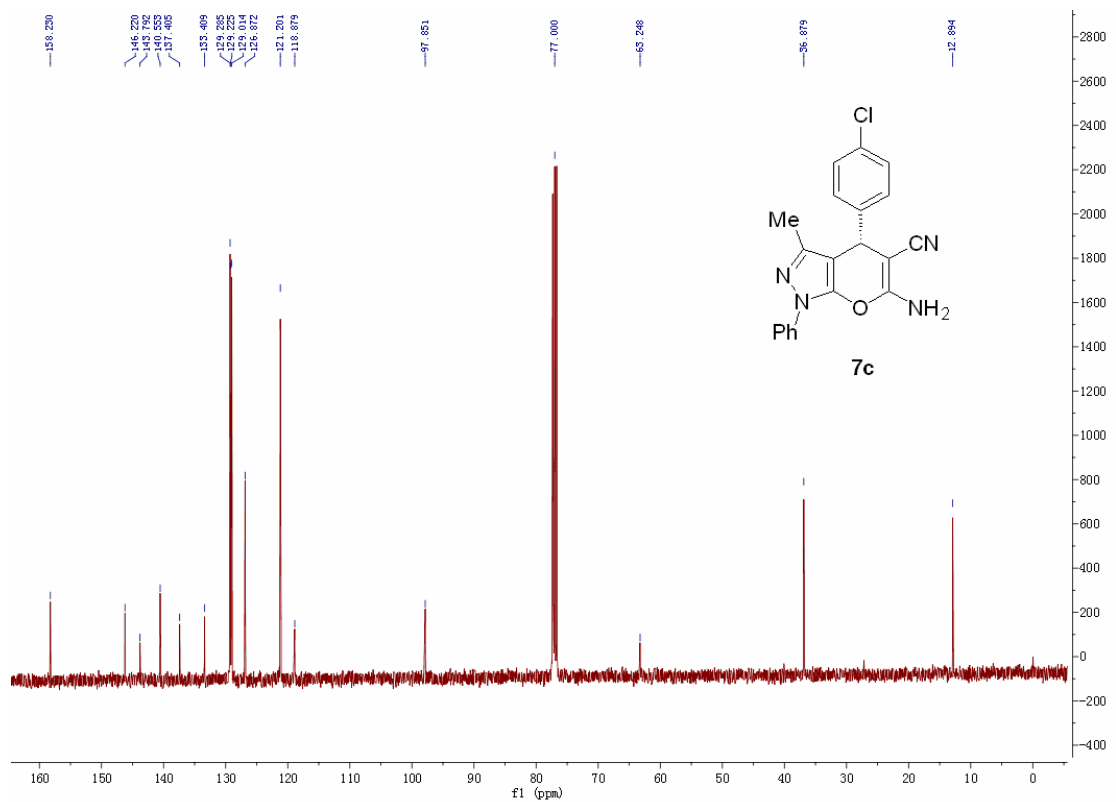

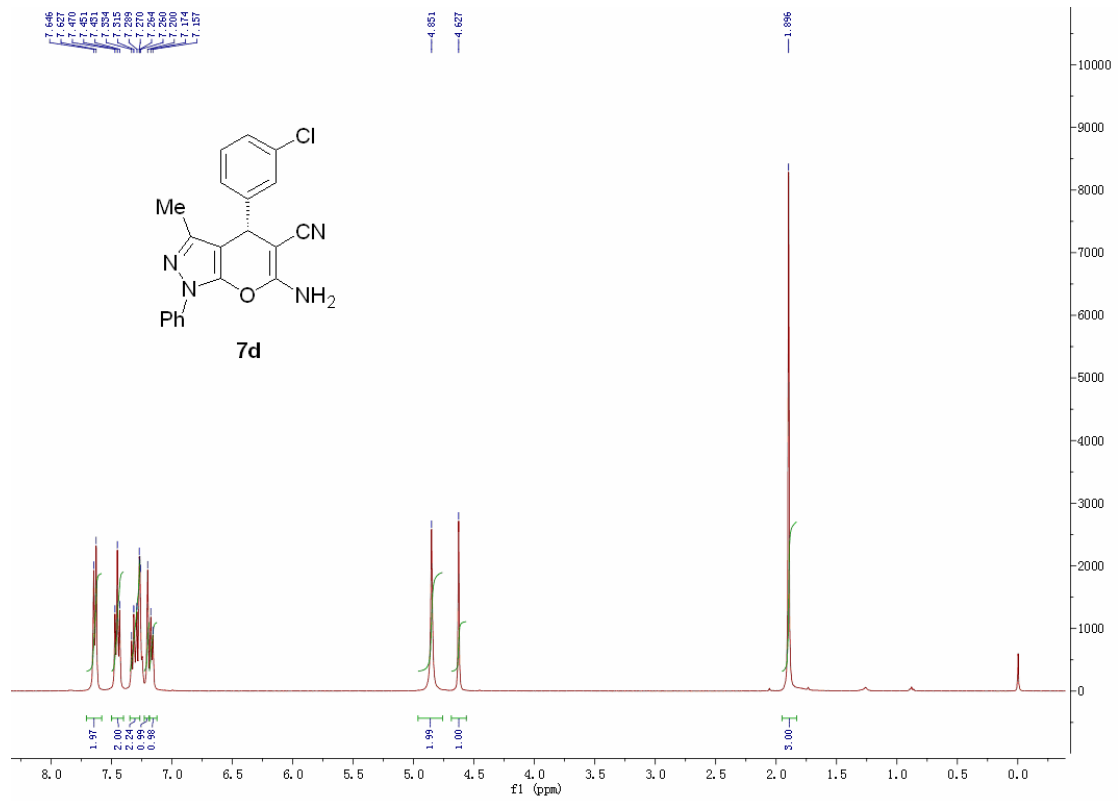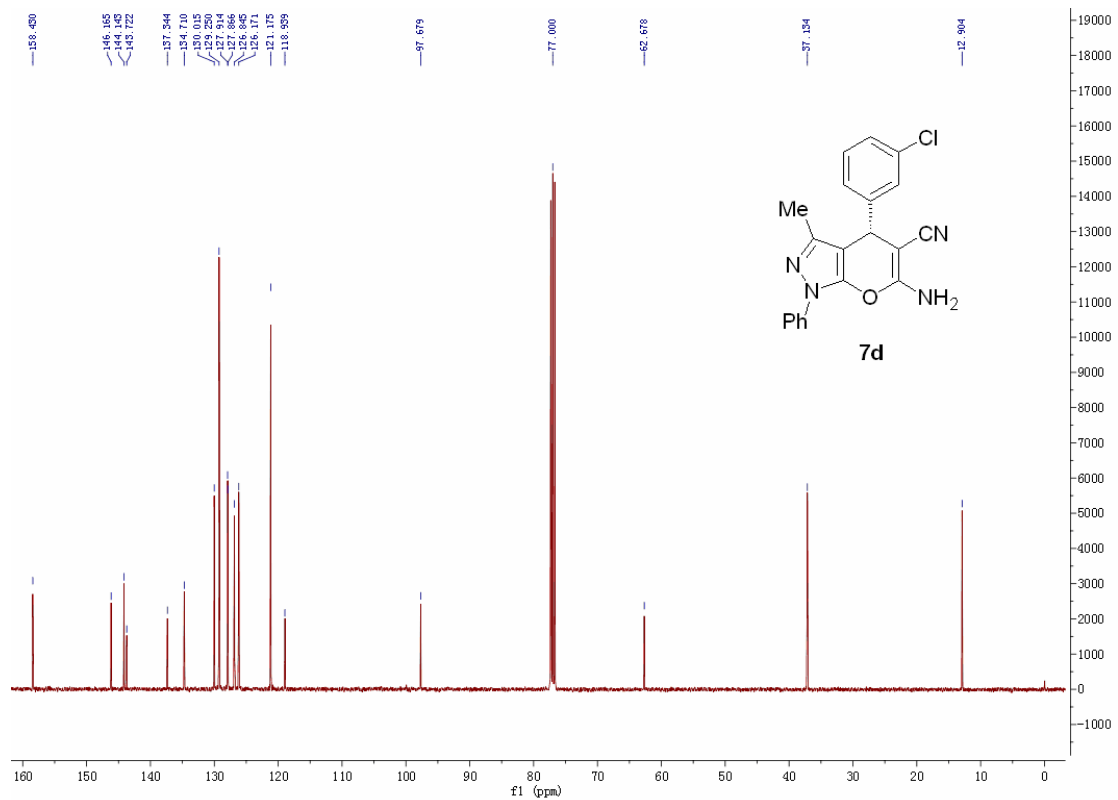

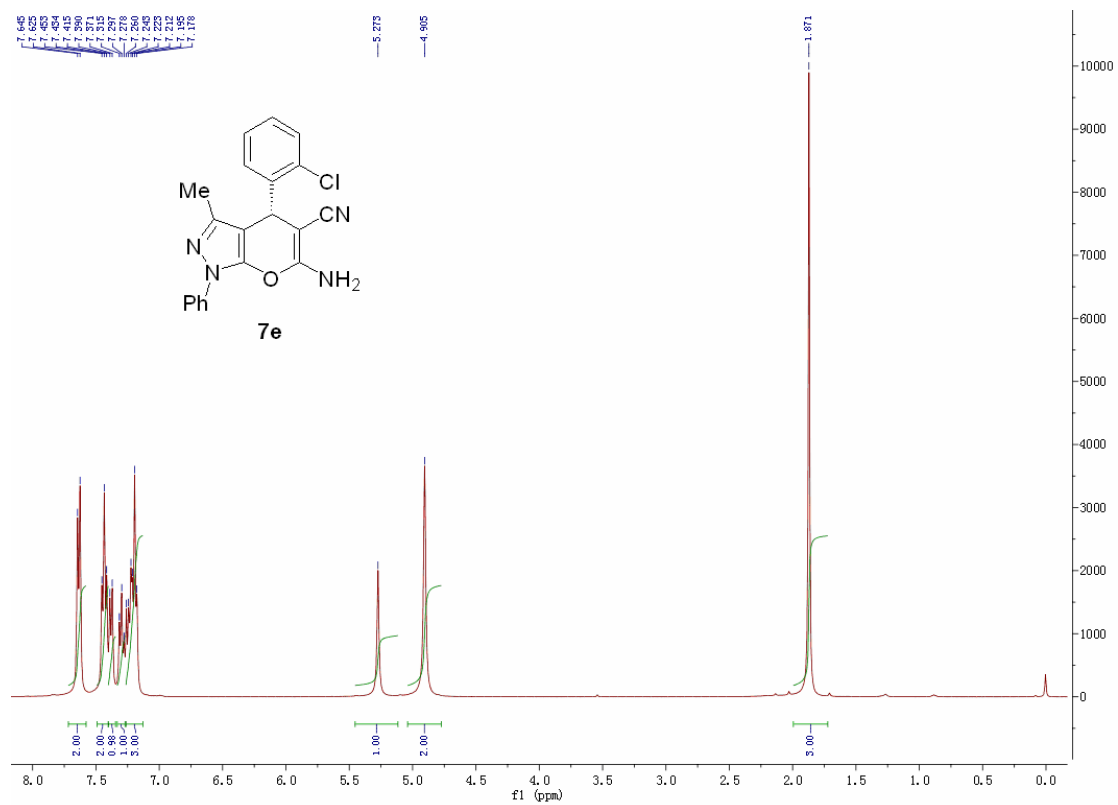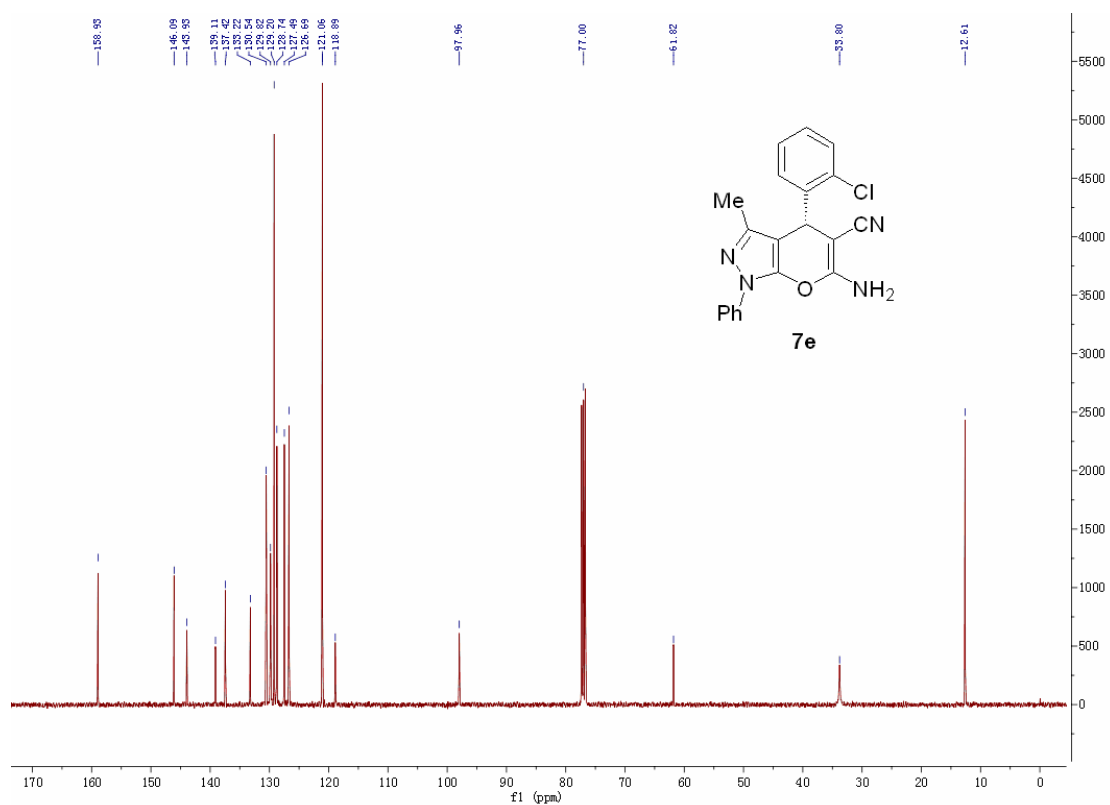



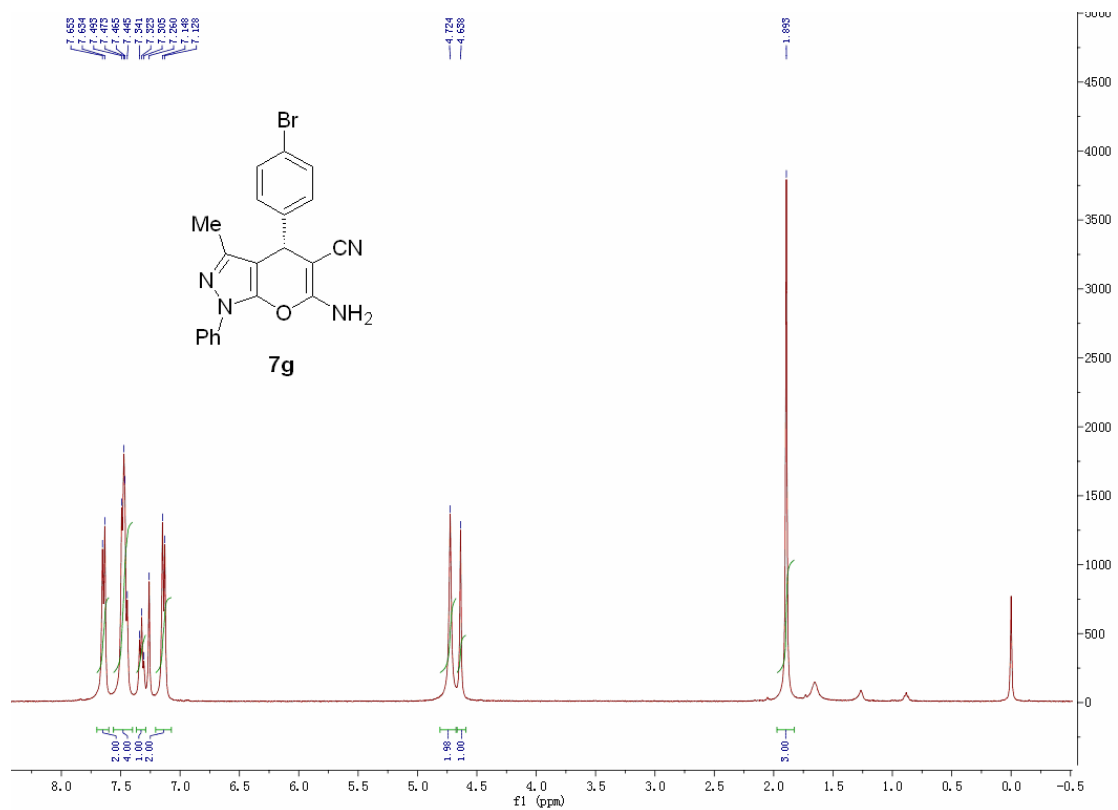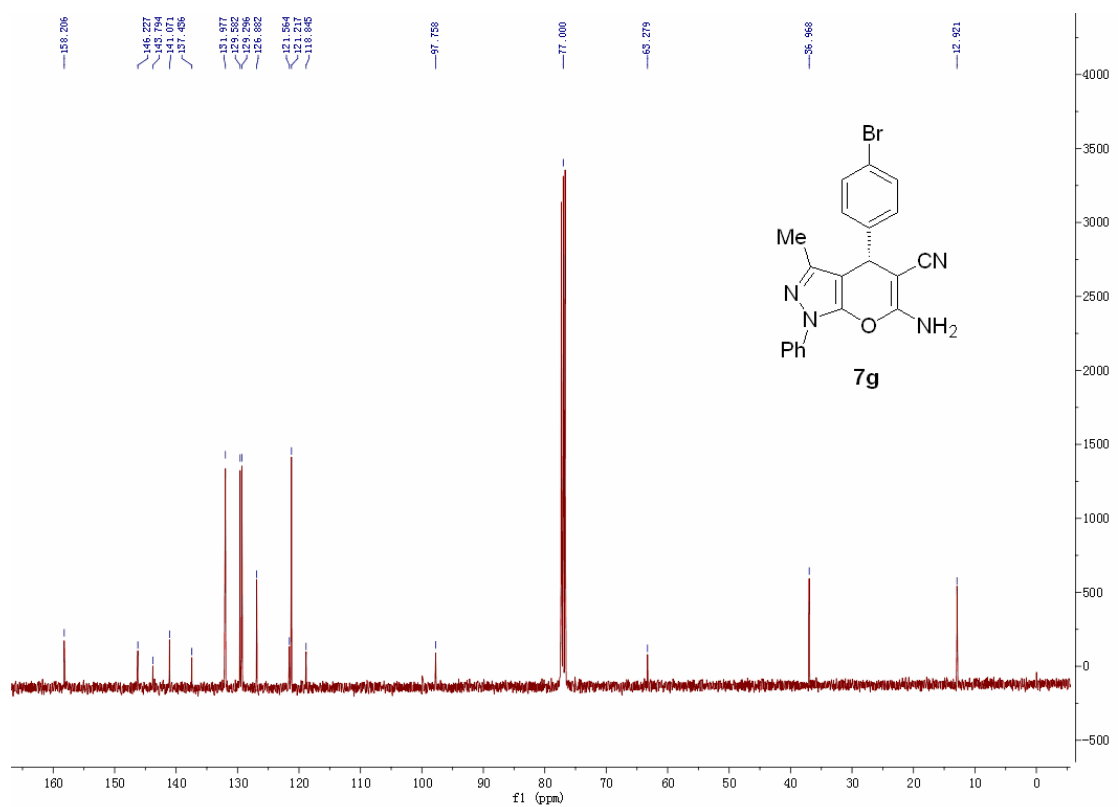



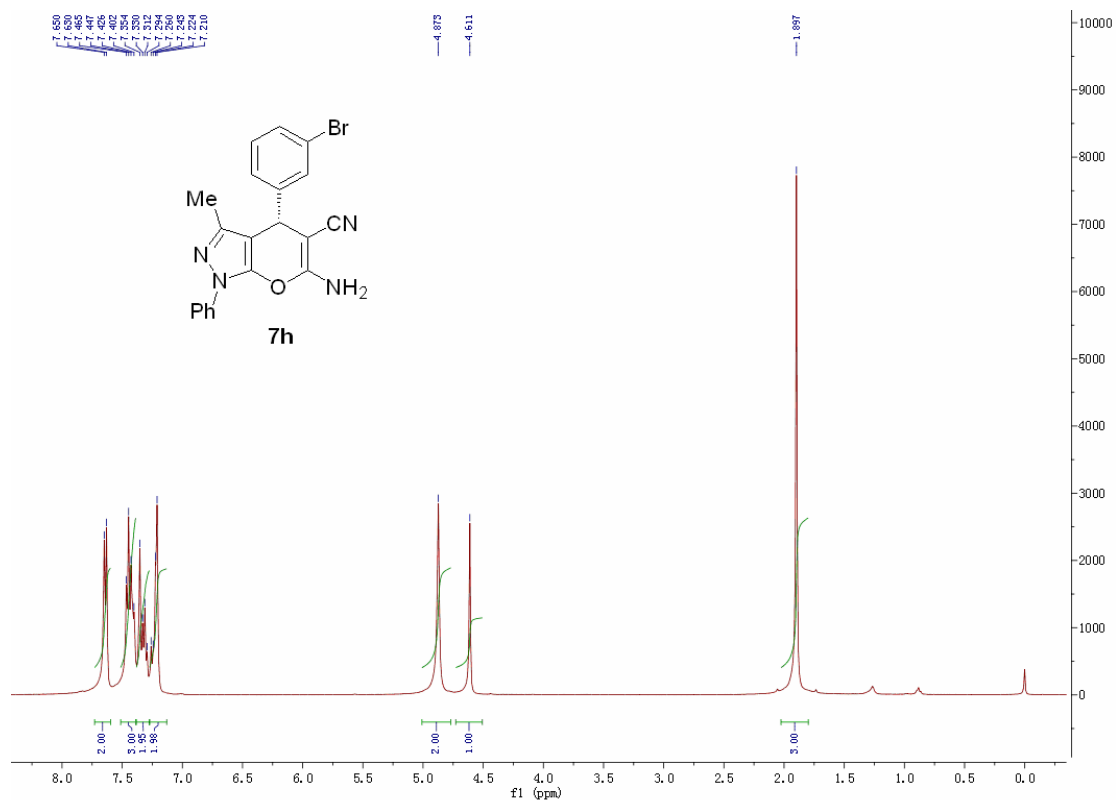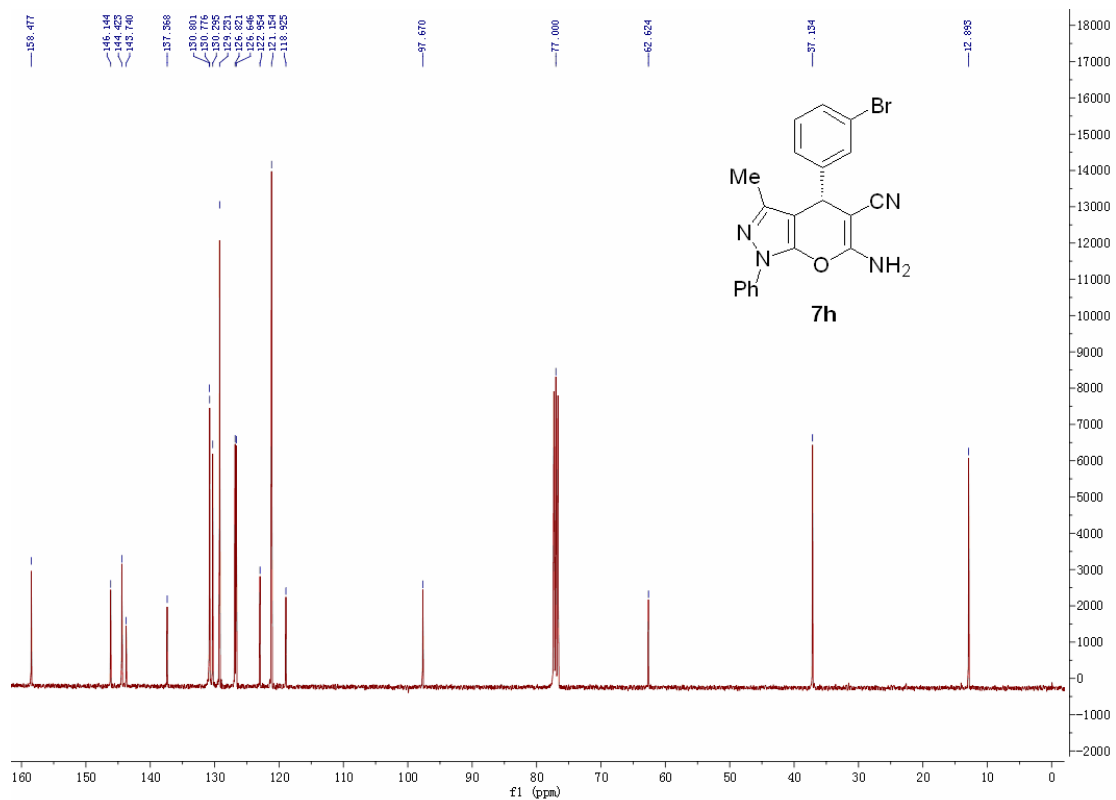

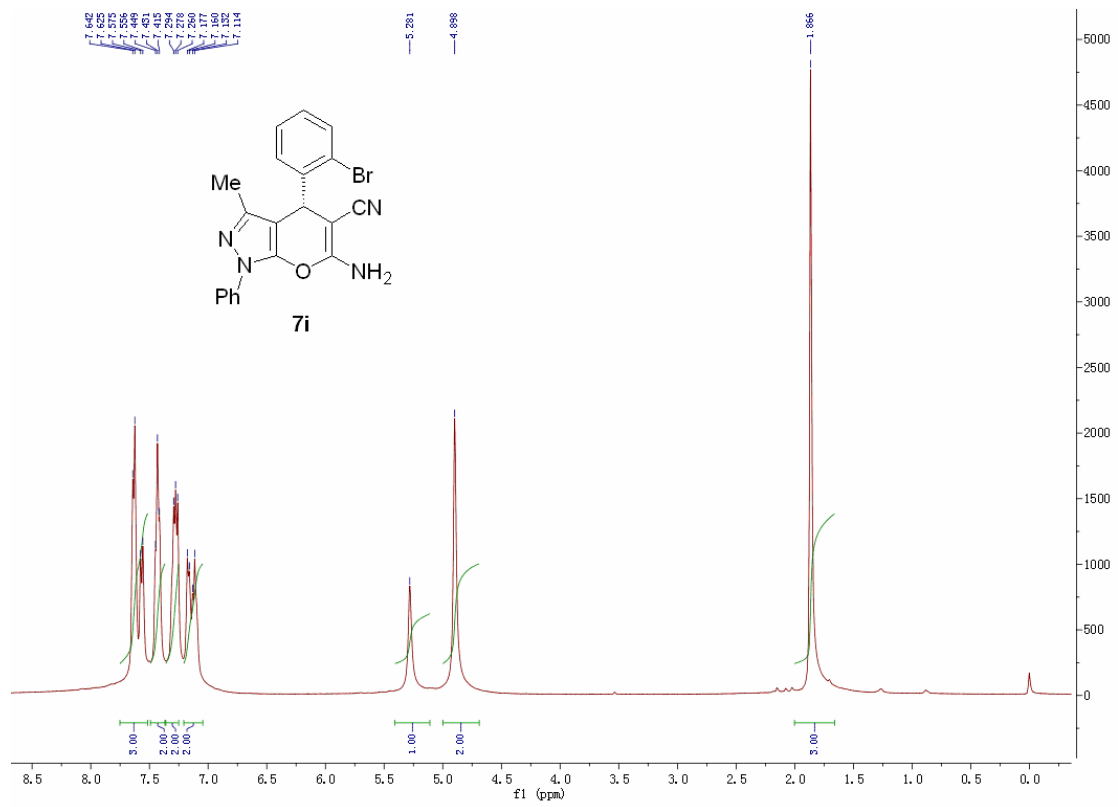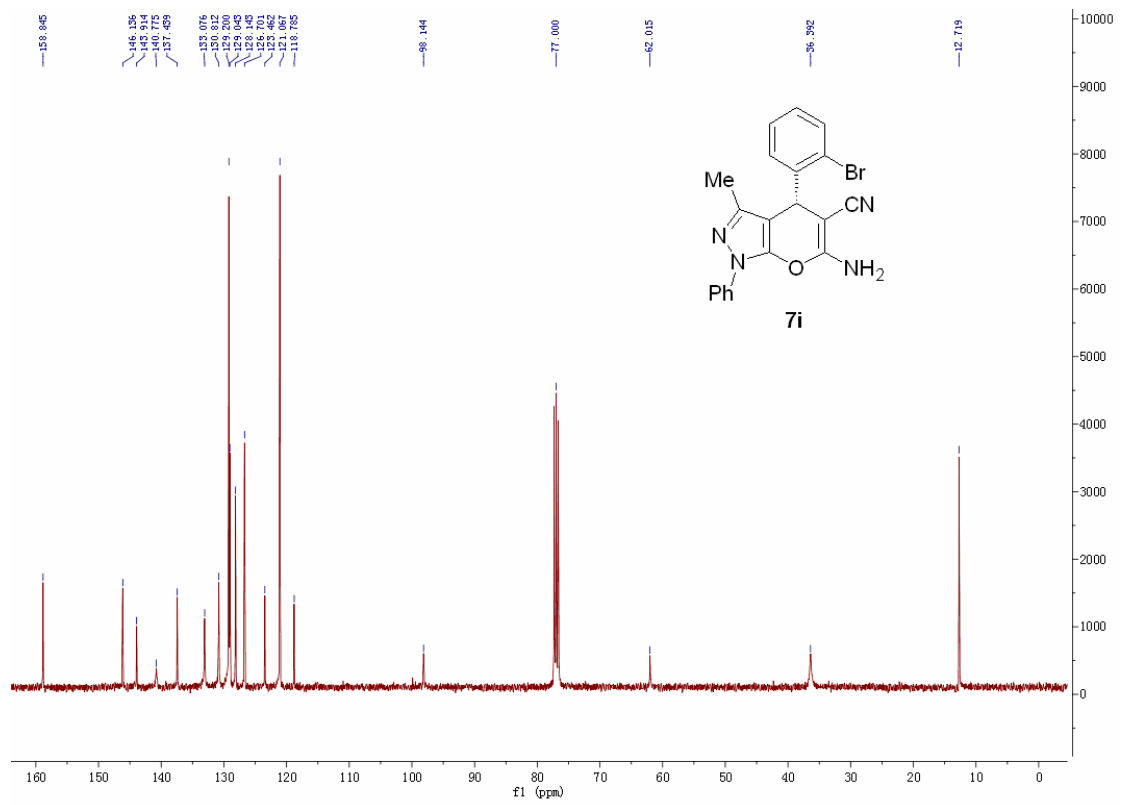

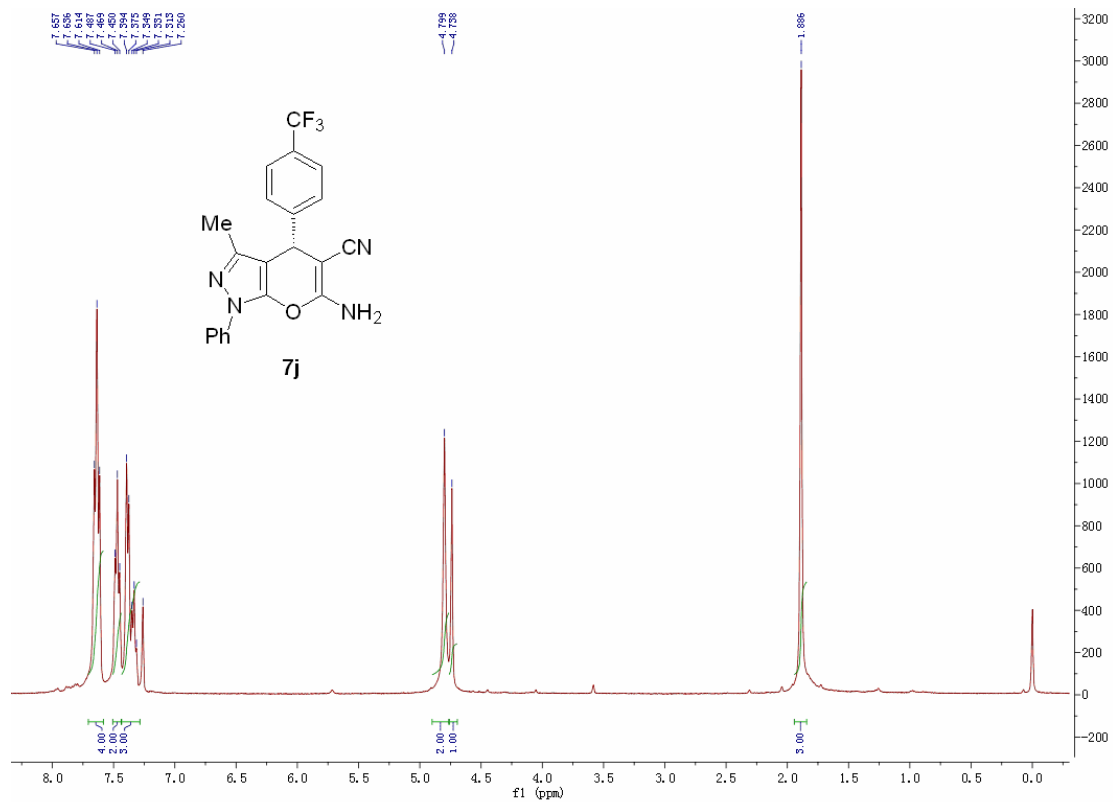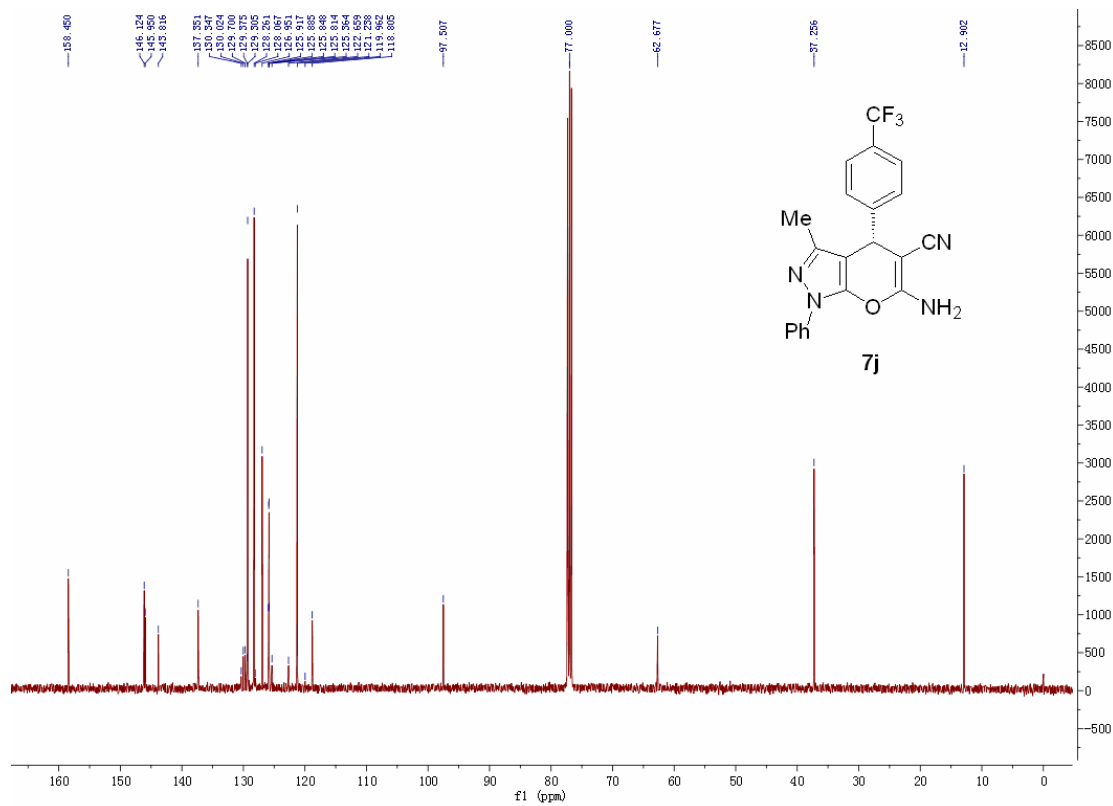

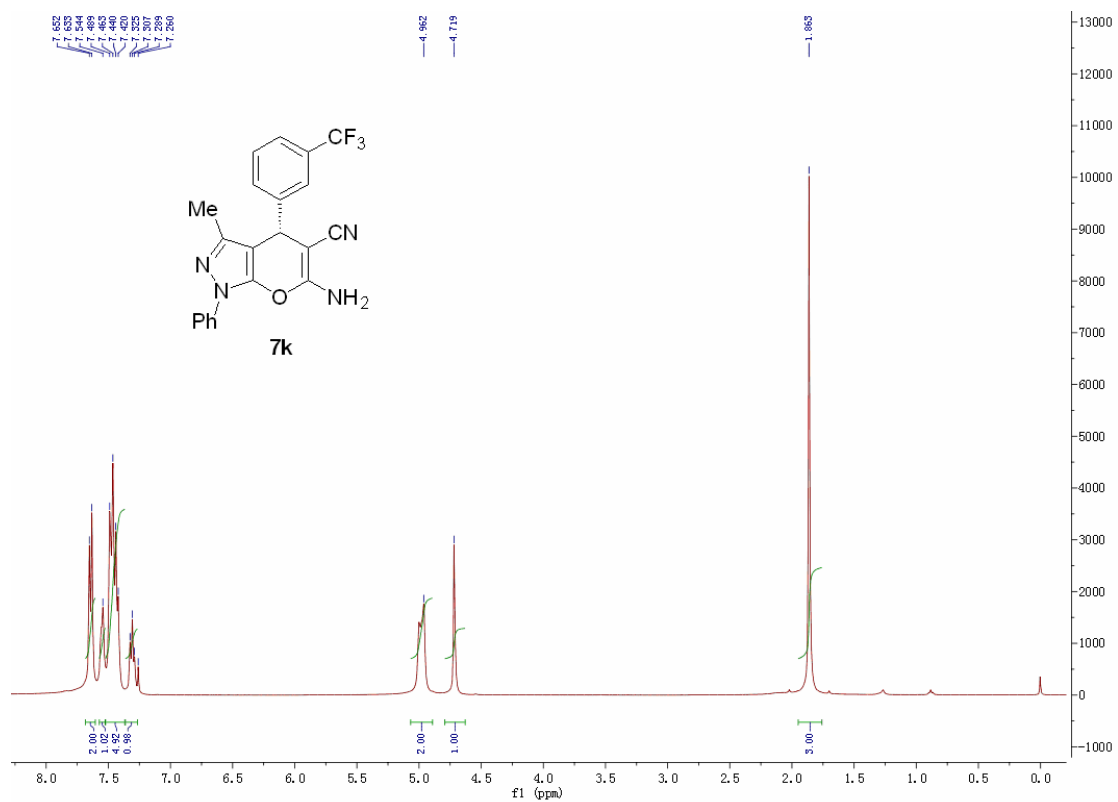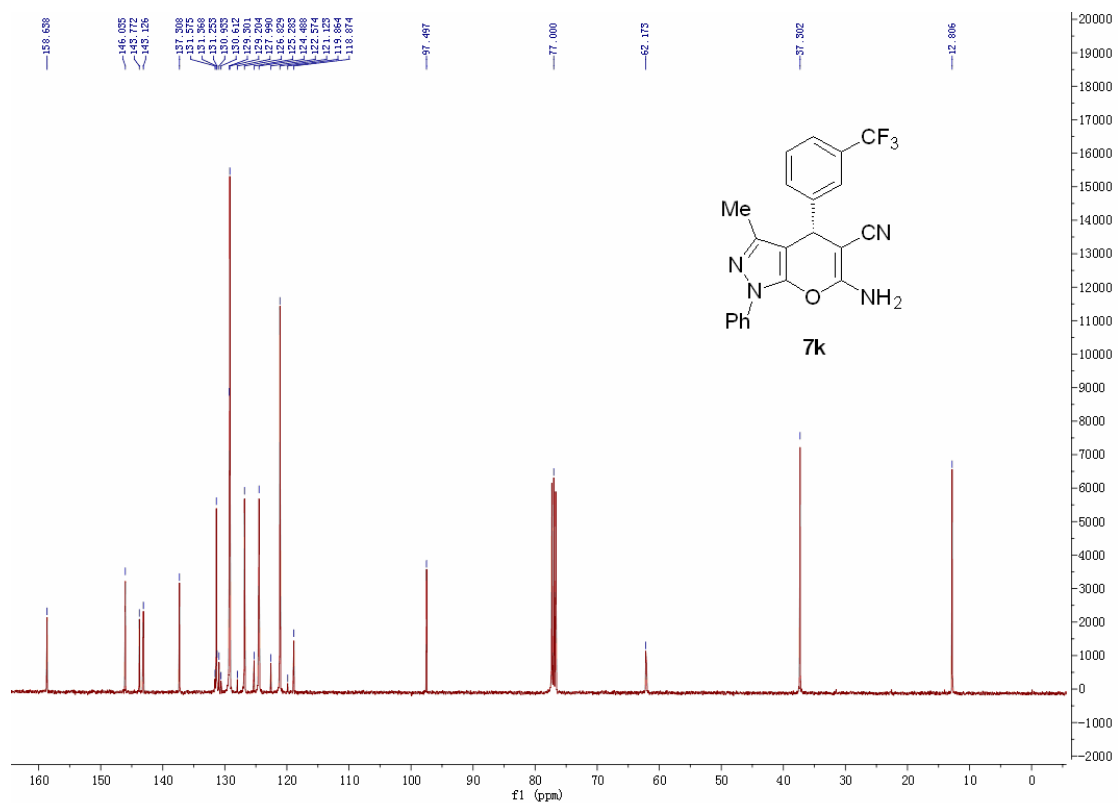

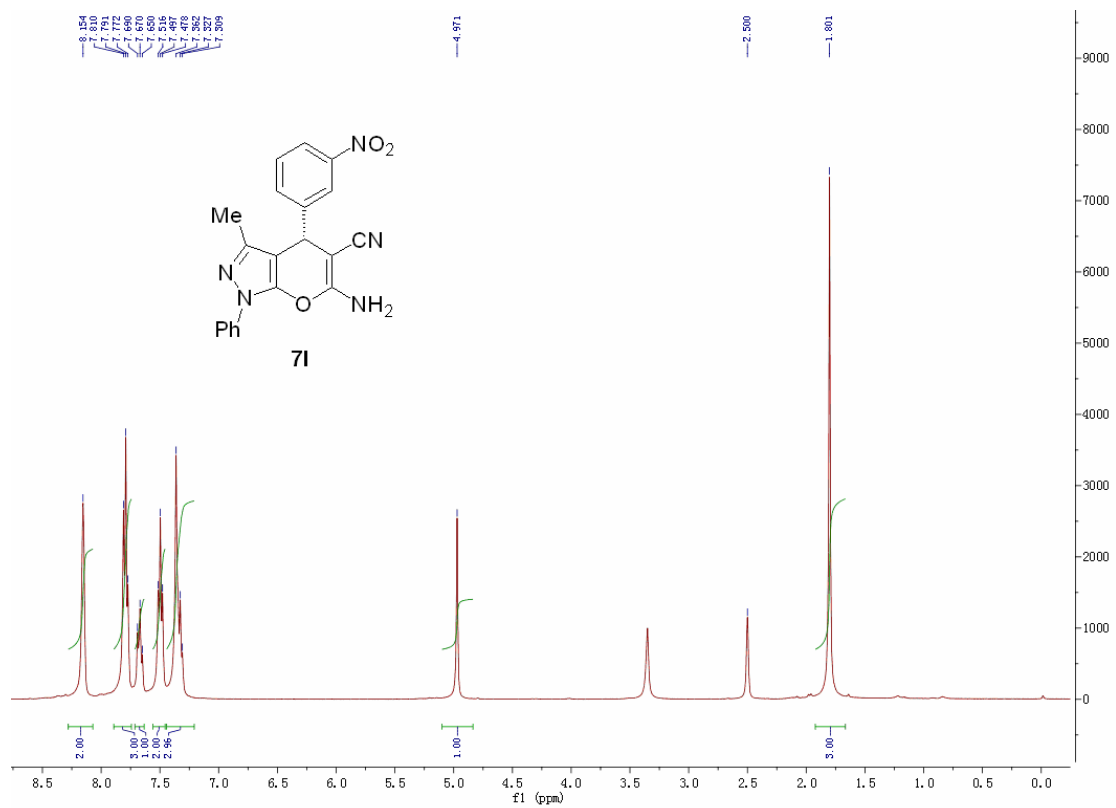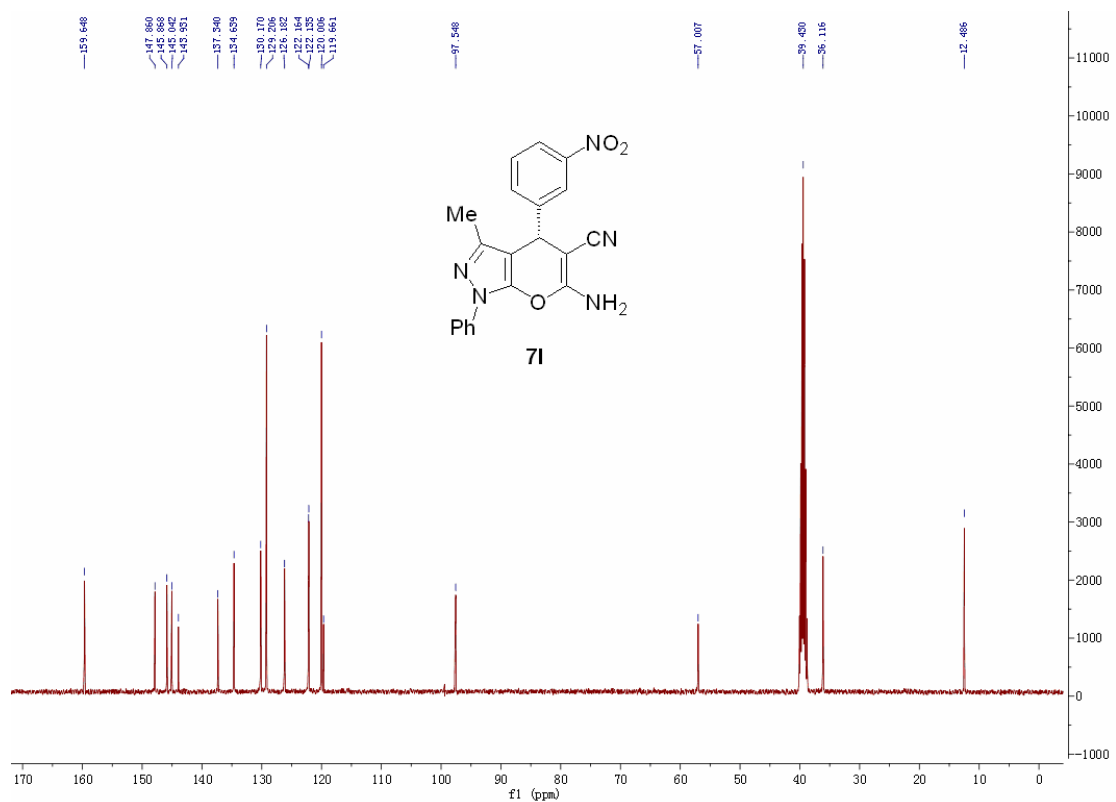

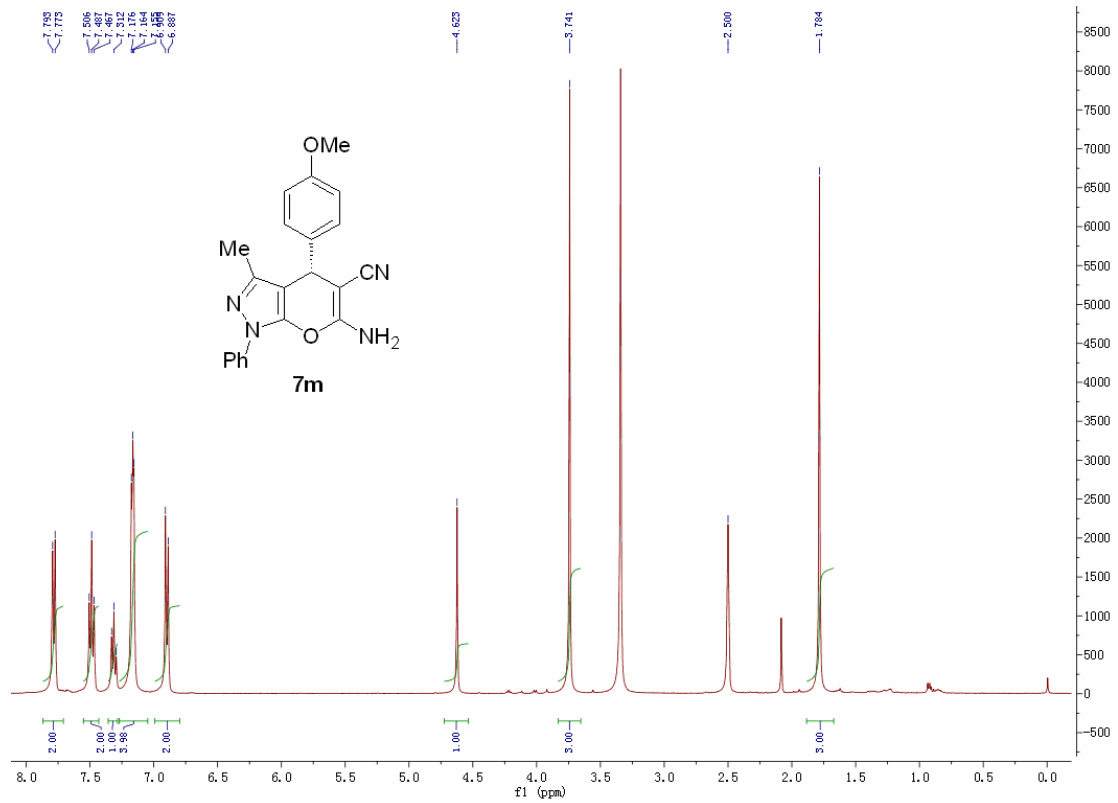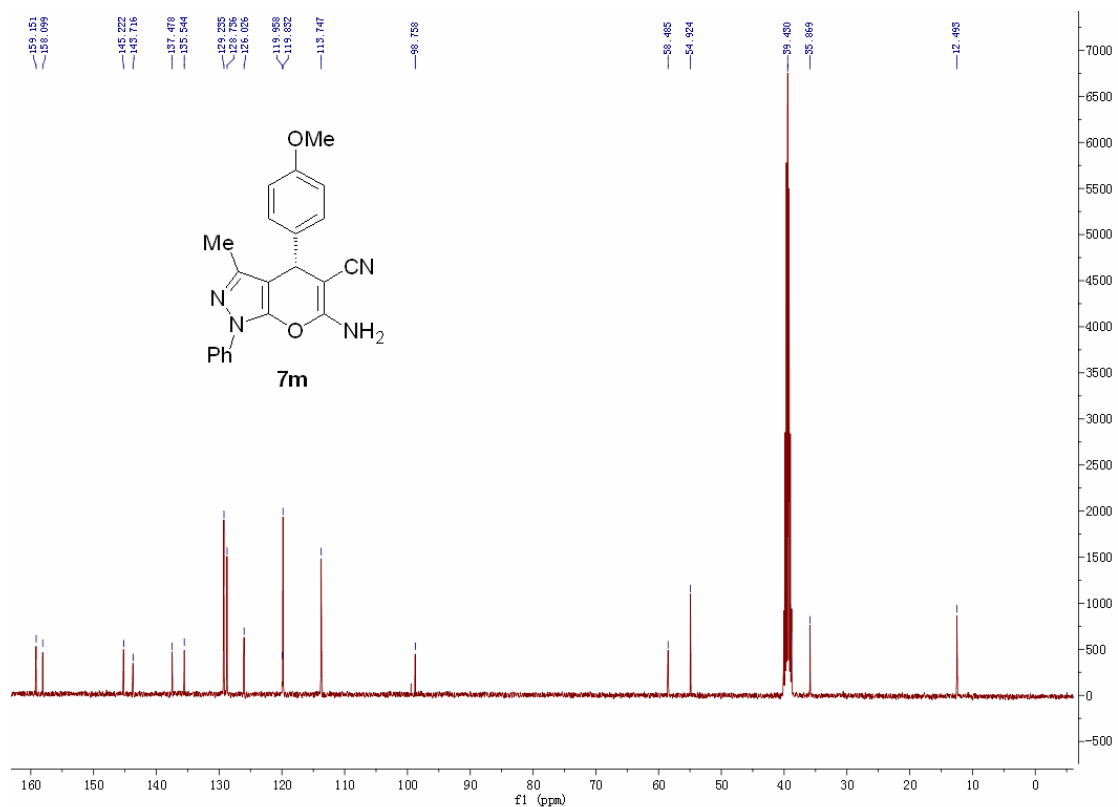

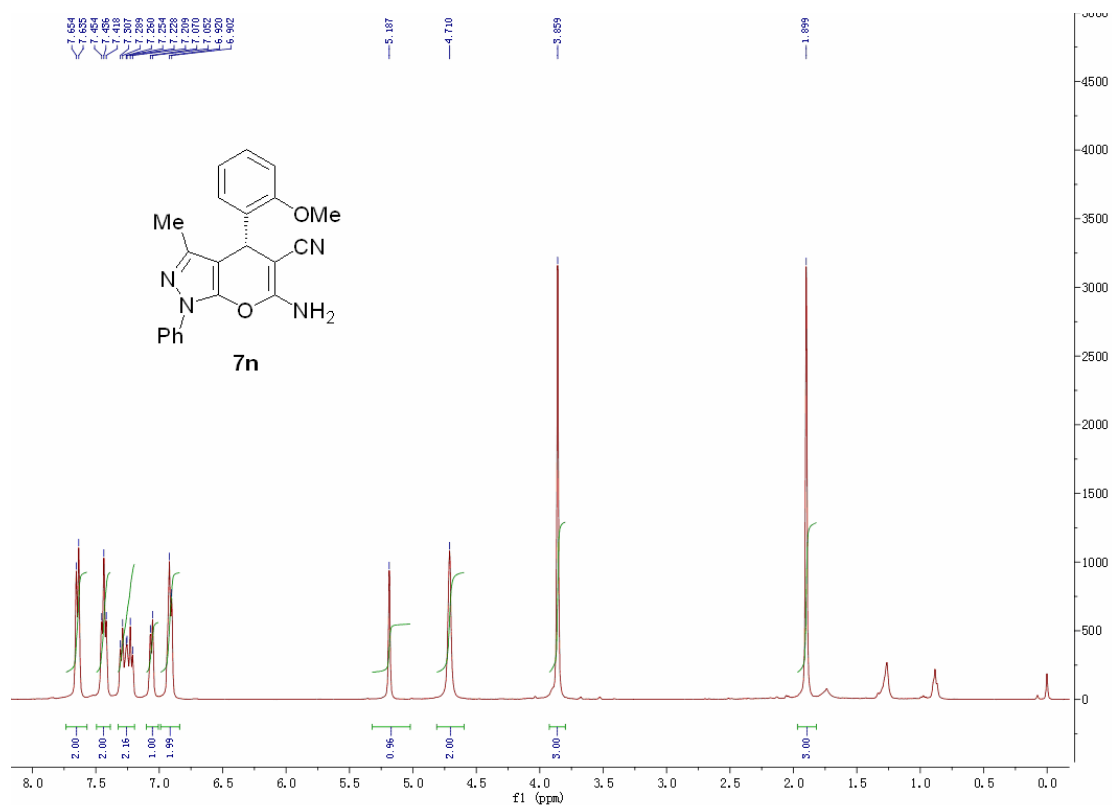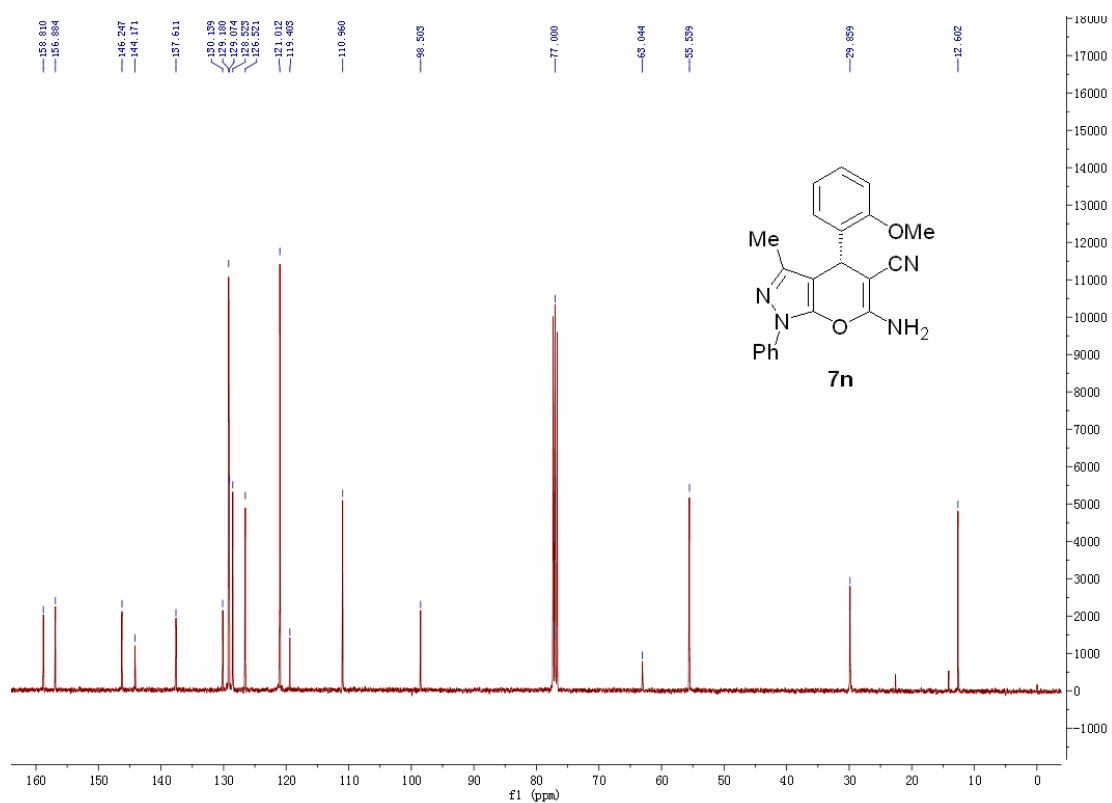

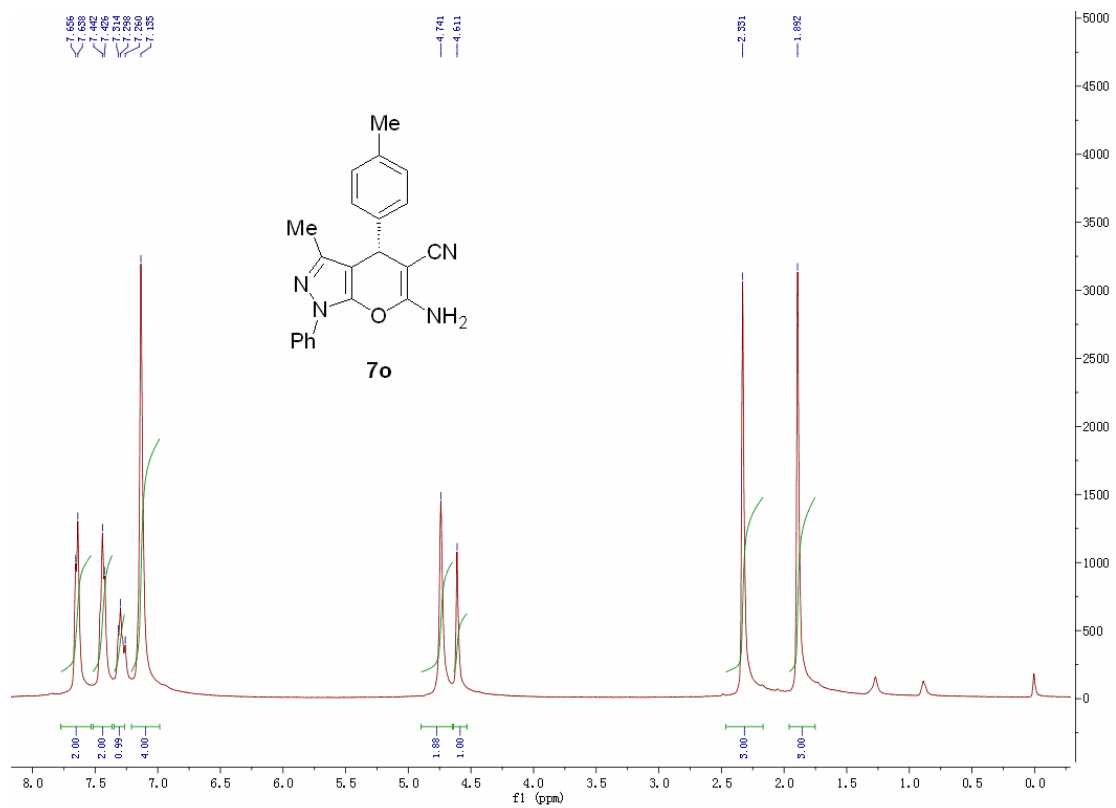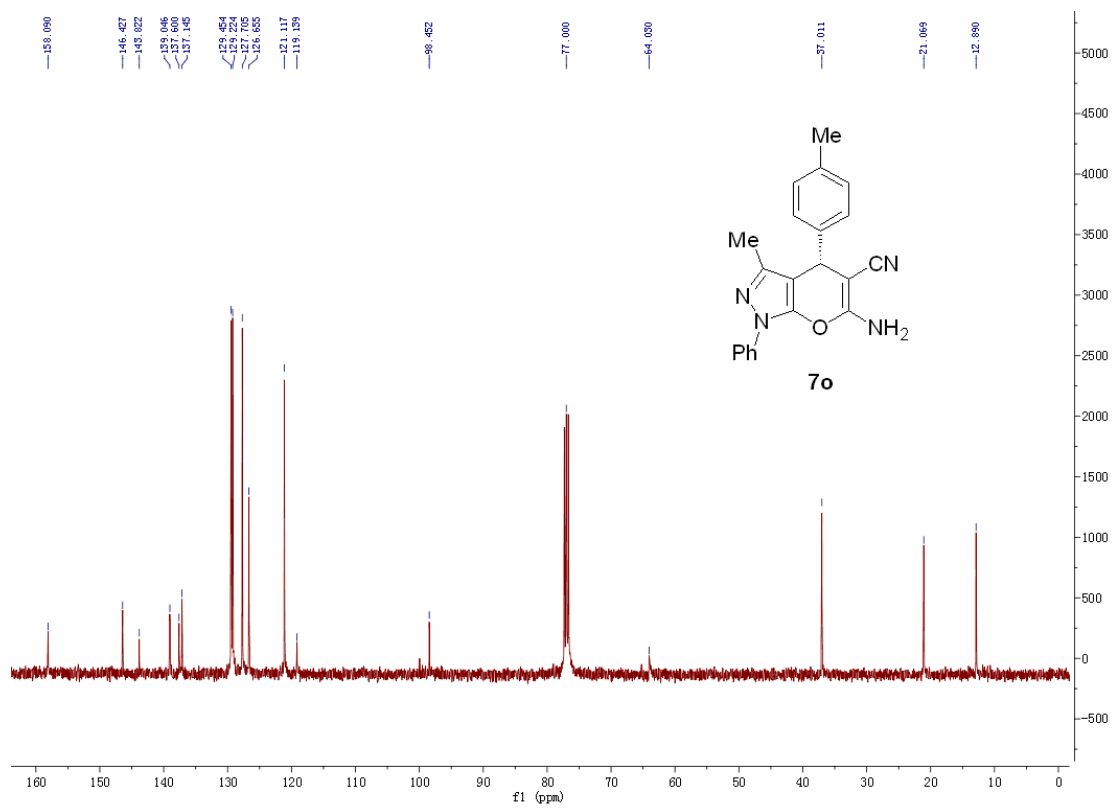



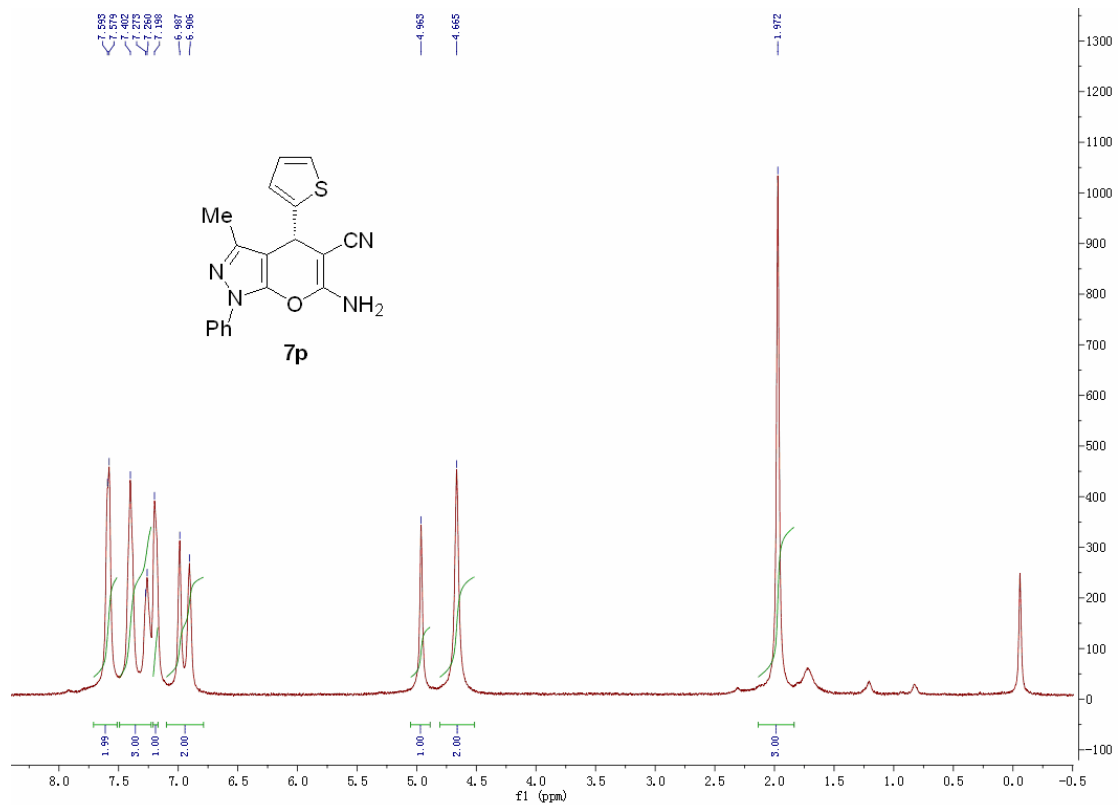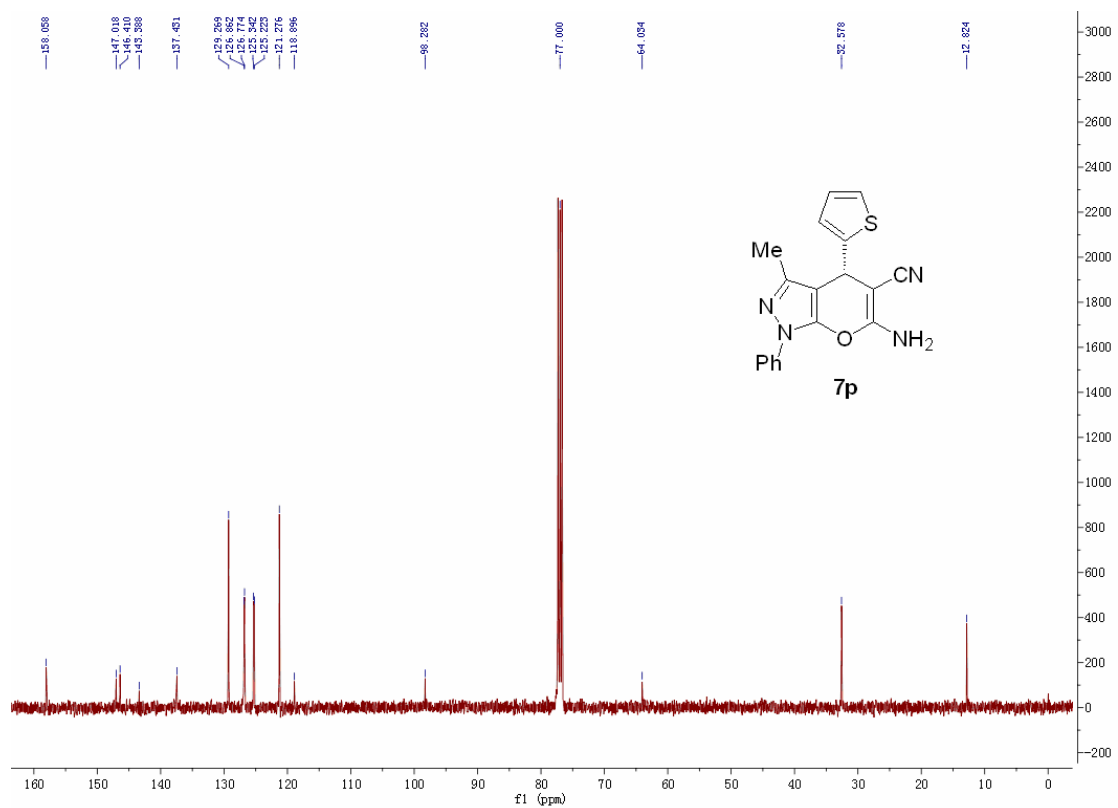

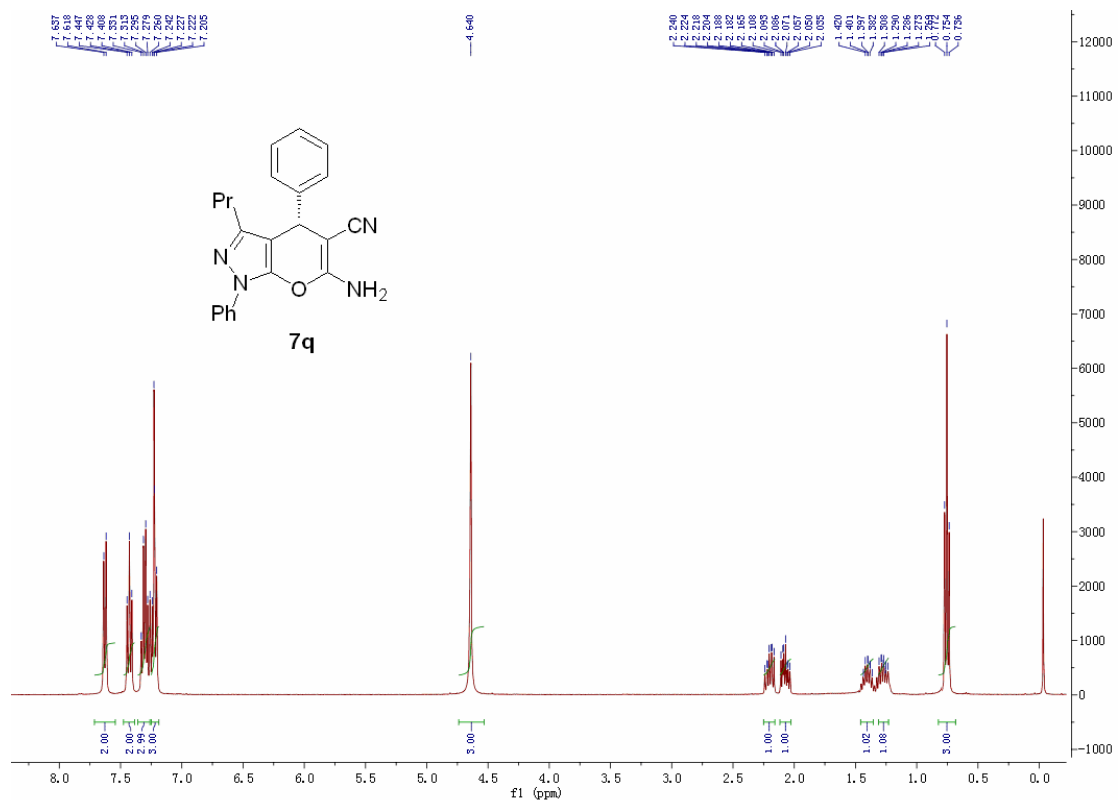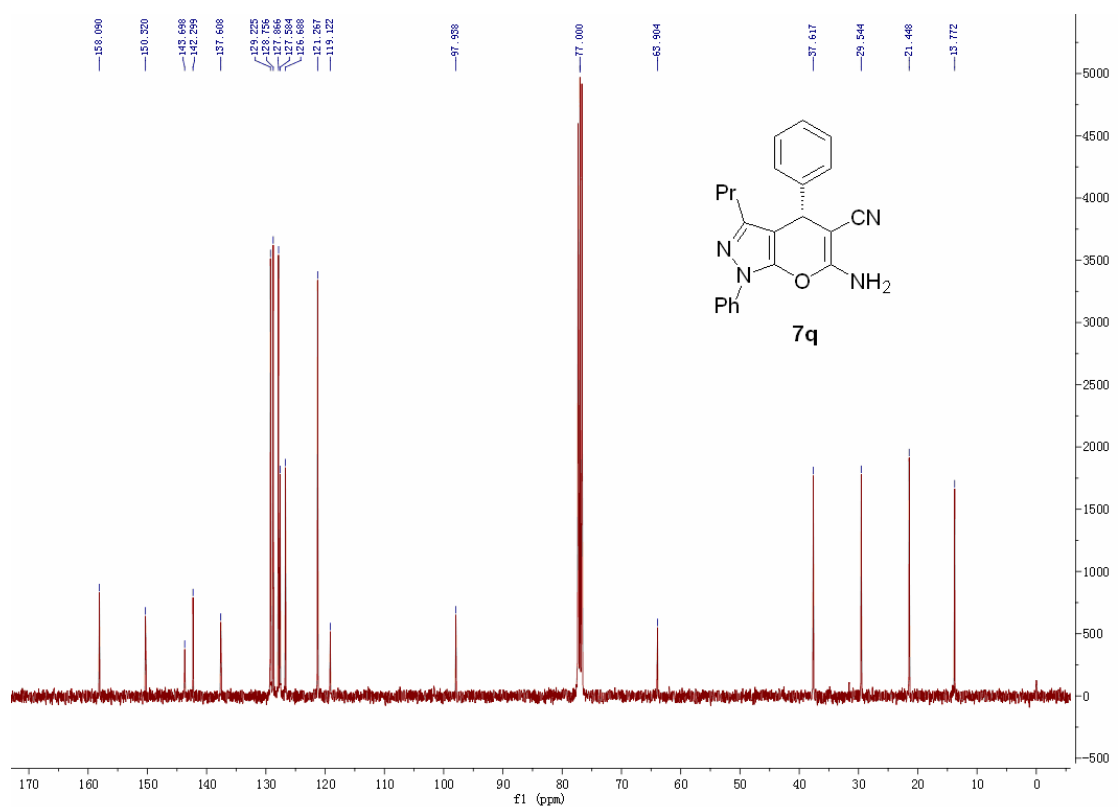

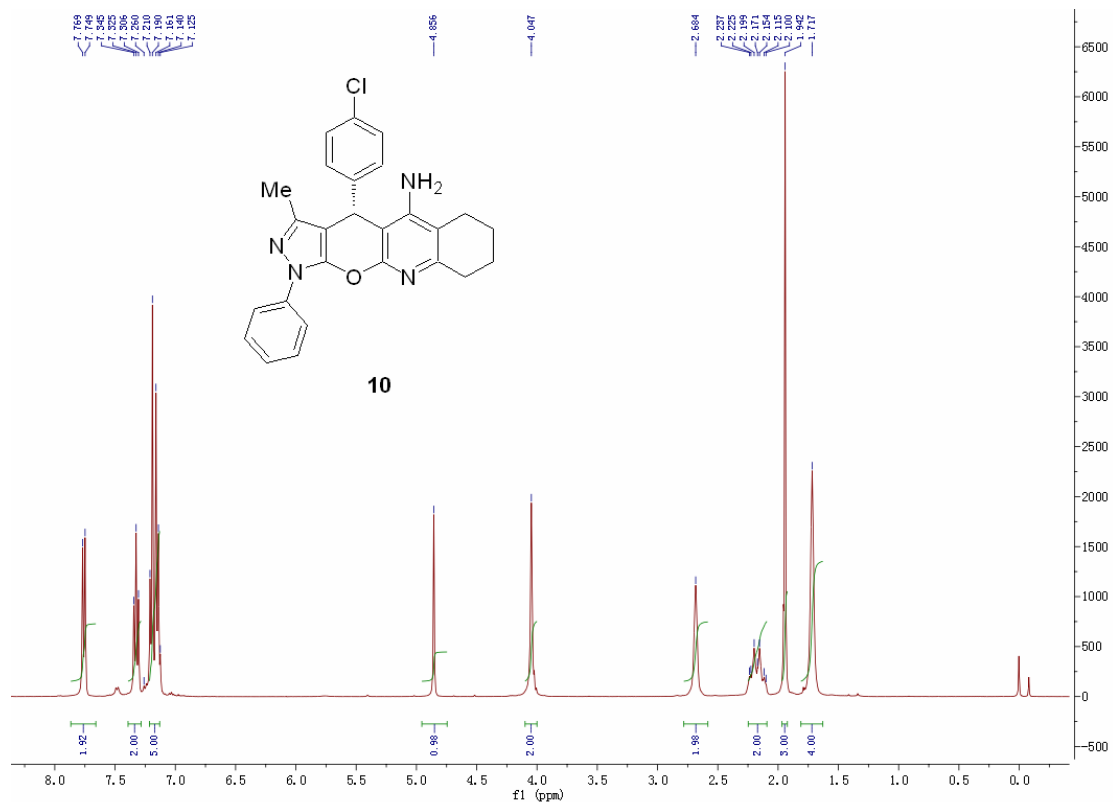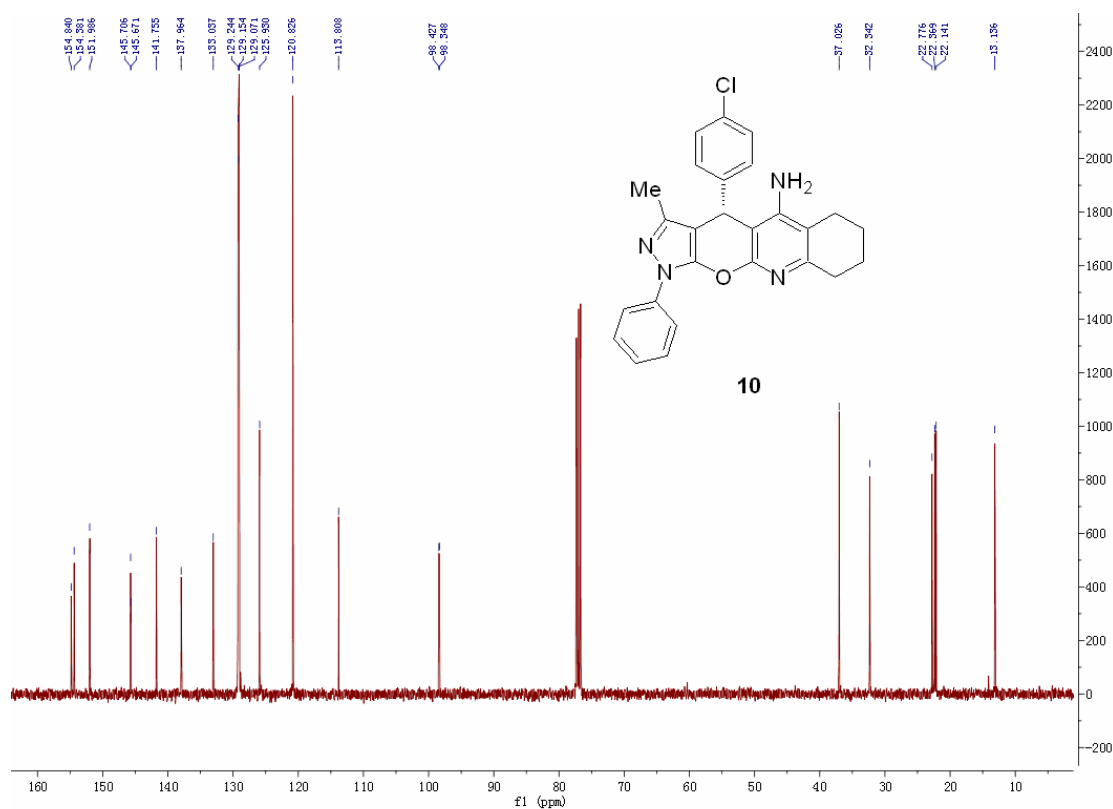

## 2. Copies of HRMS spectra

Varian QFT-ESI  
File: D-H\_ESI.trans

Mode: Negative  
Scans: 1

Date: 21-MAY-2013  
Time: 10:19:20  
Scale: 34.9534

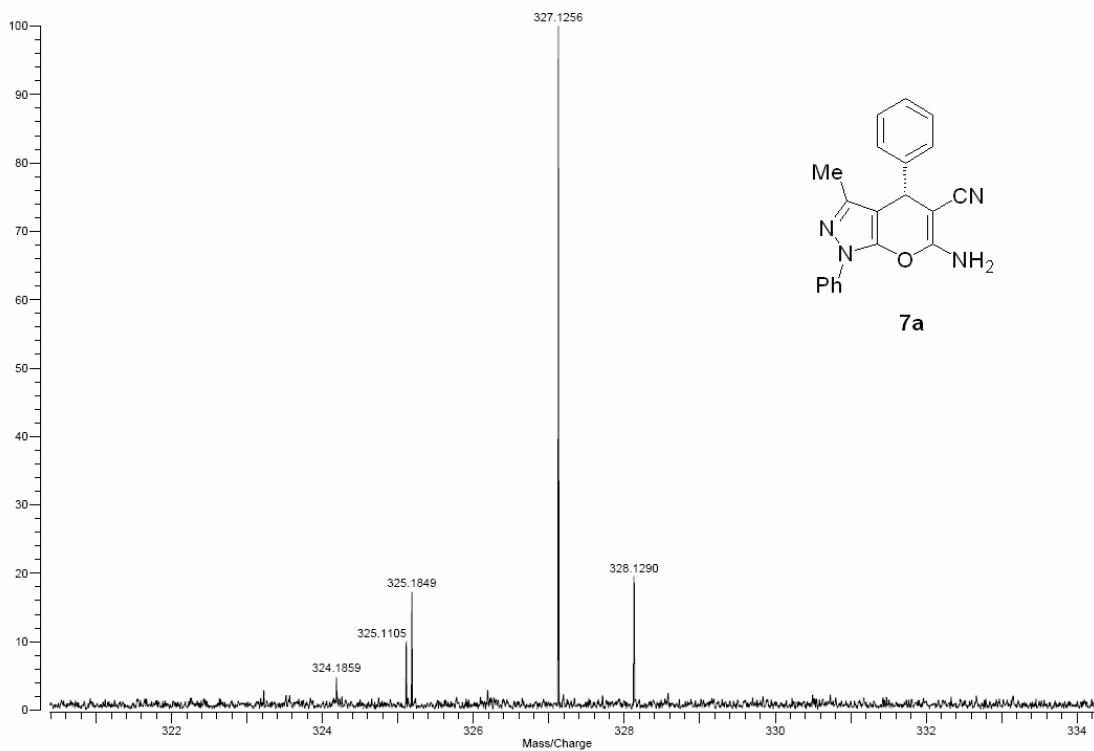

Varian QFT-ESI  
File: 4-F\_ESI.trans

Mode: Negative  
Scans: 1

Date: 20-MAY-2013  
Time: 16:51:17  
Scale: 181.4321

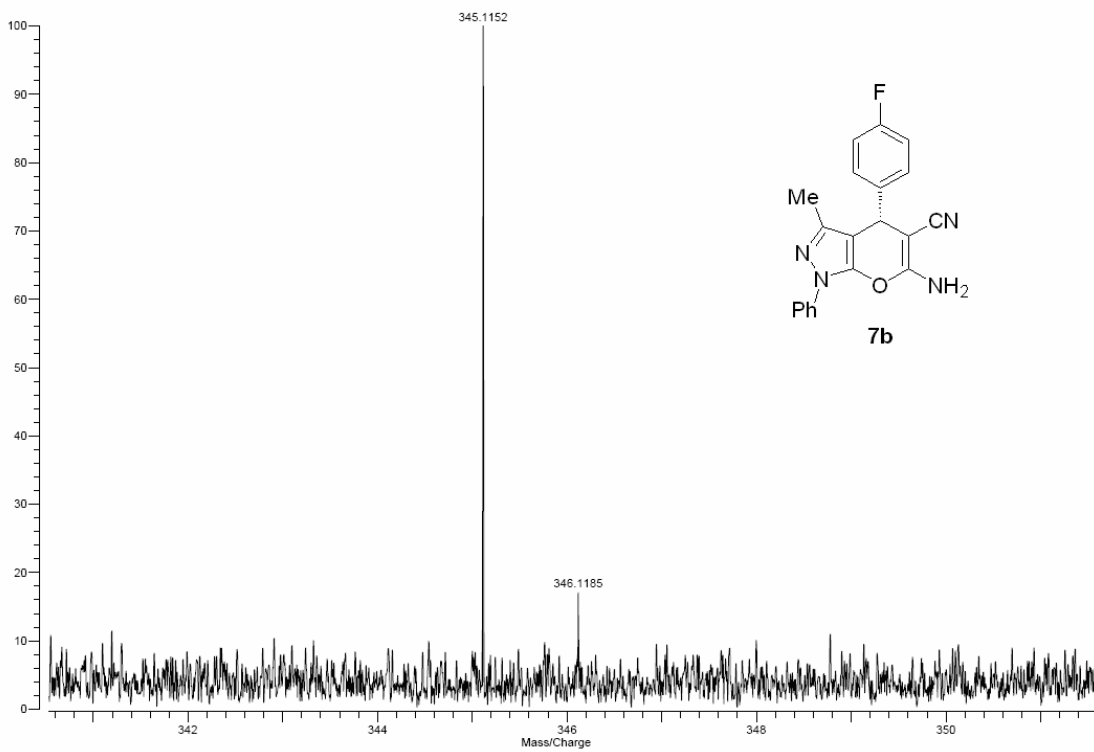

Varian QFT-ESI  
File: 4-Cl\_ESI.trans

Mode: Negative  
Scans: 1

Date: 20-MAY-2013  
Time: 16:45:06  
Scale: 18.9229

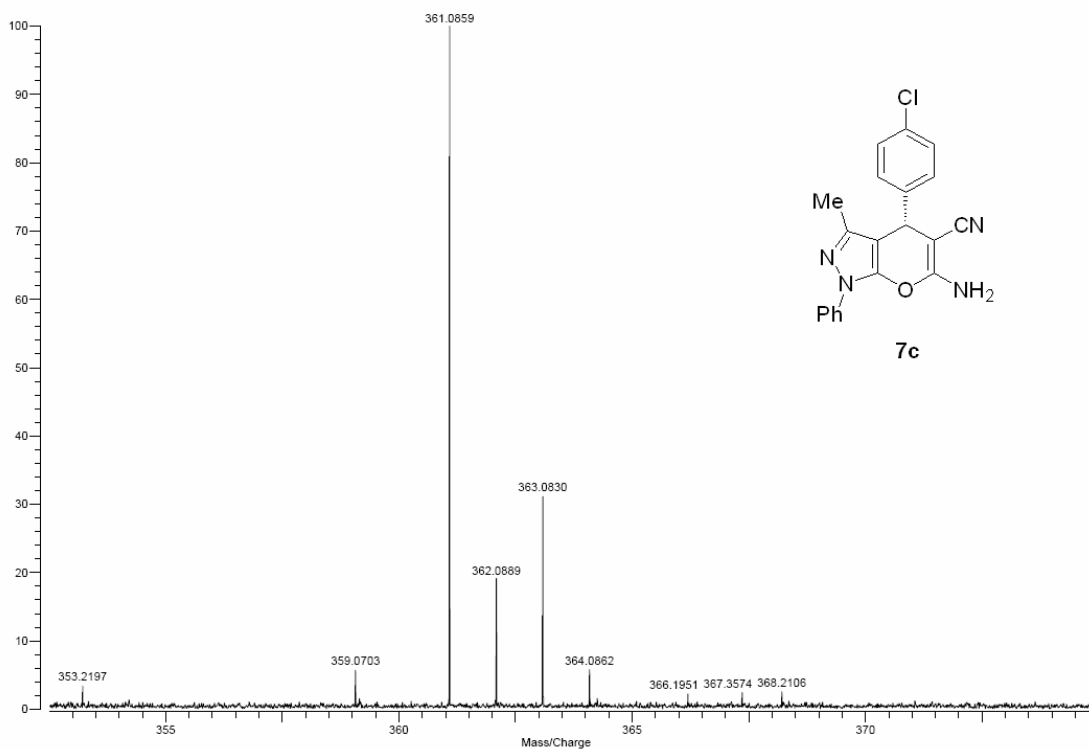

Varian QFT-ESI  
File: 3-Cl\_ESI.trans

Mode: Negative  
Scans: 1

Date: 20-MAY-2013  
Time: 16:45:19  
Scale: 6.8487

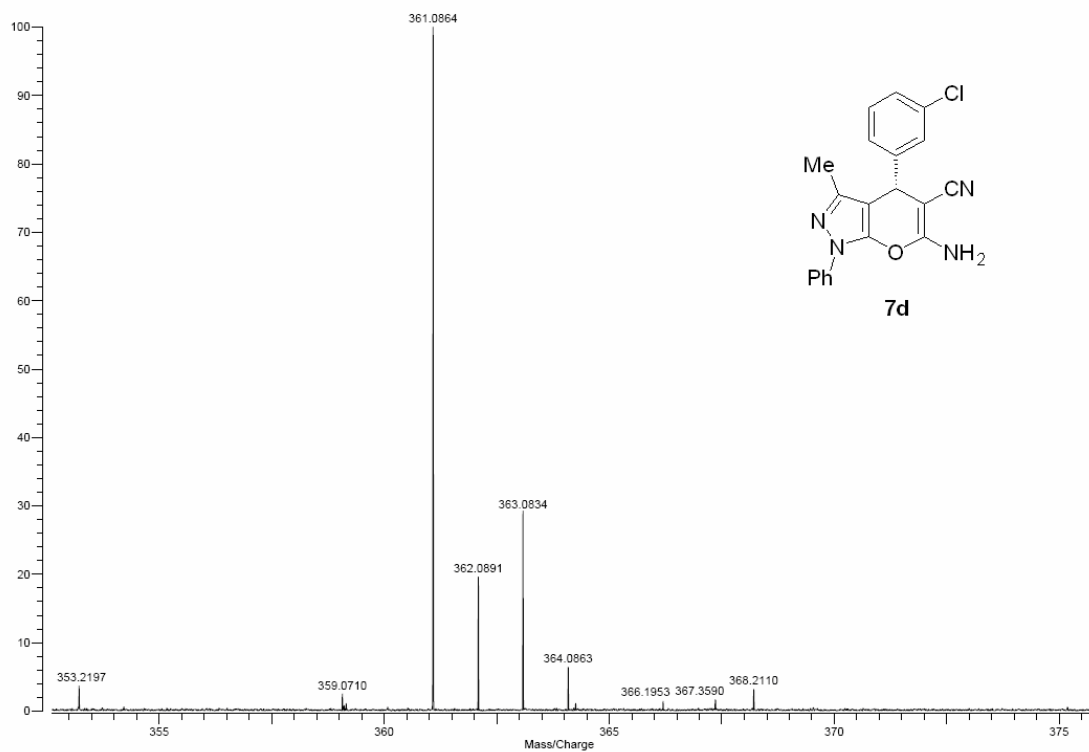

|               |        |             |           |                 |              |                        |                       |
|---------------|--------|-------------|-----------|-----------------|--------------|------------------------|-----------------------|
| Sample Name   | lc/ms  | Position    | P1-A3     | Instrument Name | Instrument 1 | User Name              |                       |
| Inj Vol       | 3      | InjPosition |           | SampleType      | Sample       | IRM Calibration Status | Some Ions Missed      |
| Data Filename | 2-Cl.d | ACQ Method  | chen-ms.m | Comment         |              | Acquired Time          | 6/17/2013 11:54:15 AM |

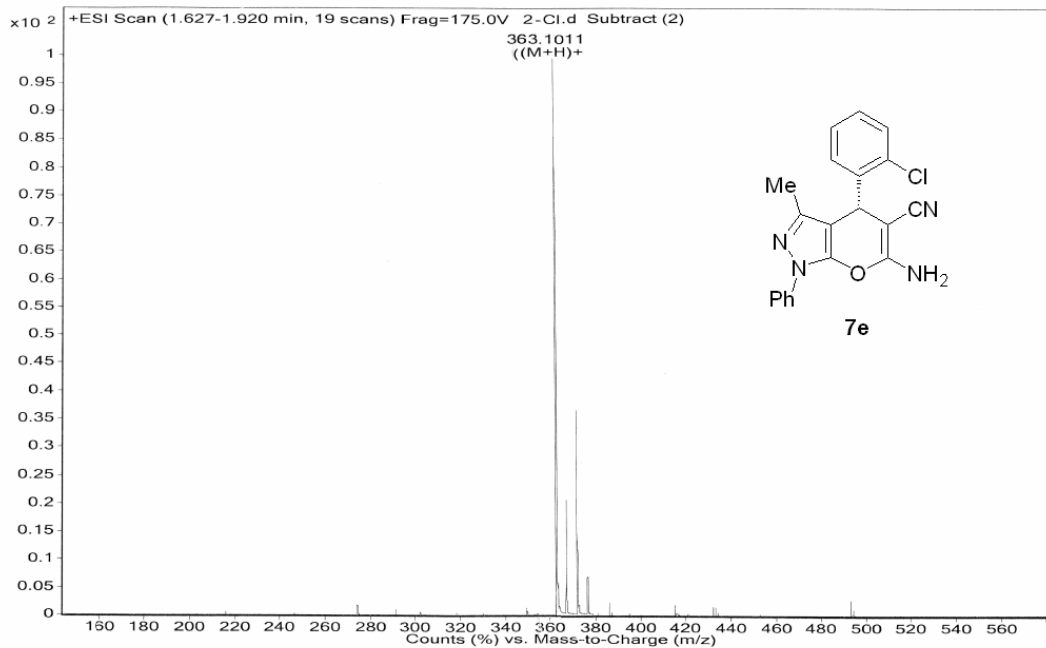

Varian ProMALDI  
File: ZZH-WHX-2,4-CL-DHB-LASER60.trans

Mode: Positive  
Scans: 1  
Date: 24-MAY-2013  
Time: 12:49:42  
Scale: 9.8357

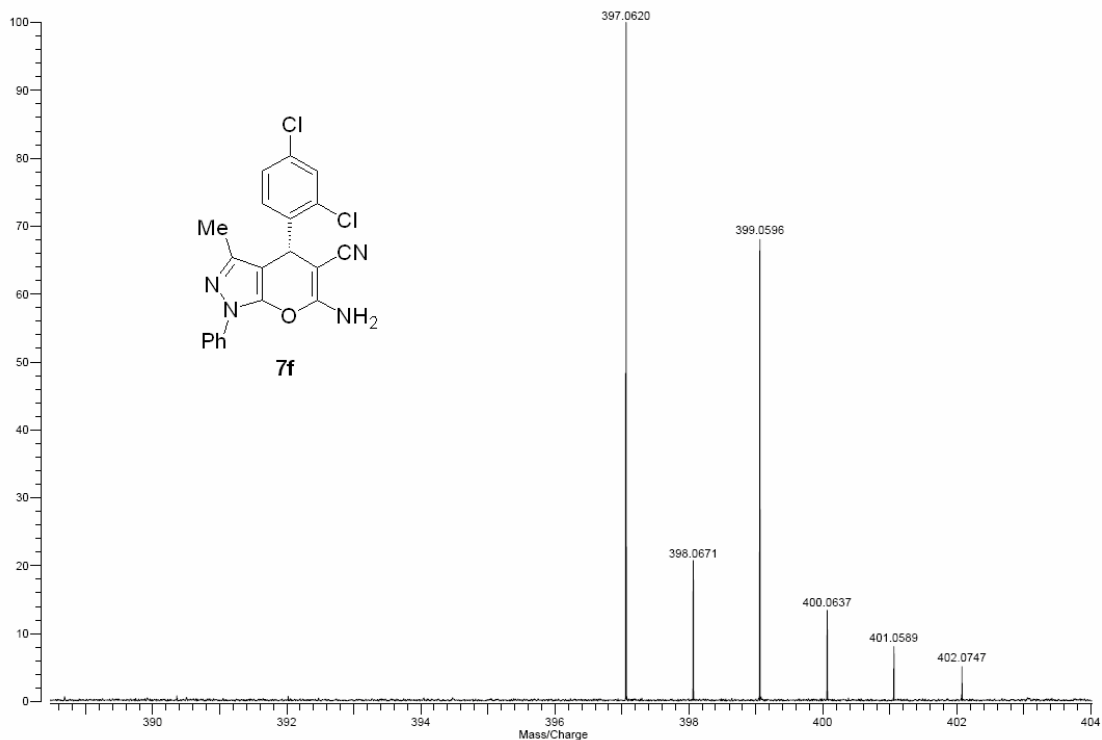

Varian QFT-ESI  
File: 4-Br\_ESI.trans

Mode: Negative  
Scans: 1  
Date: 20-MAY-2013  
Time: 16:26:22  
Scale: 61.8027

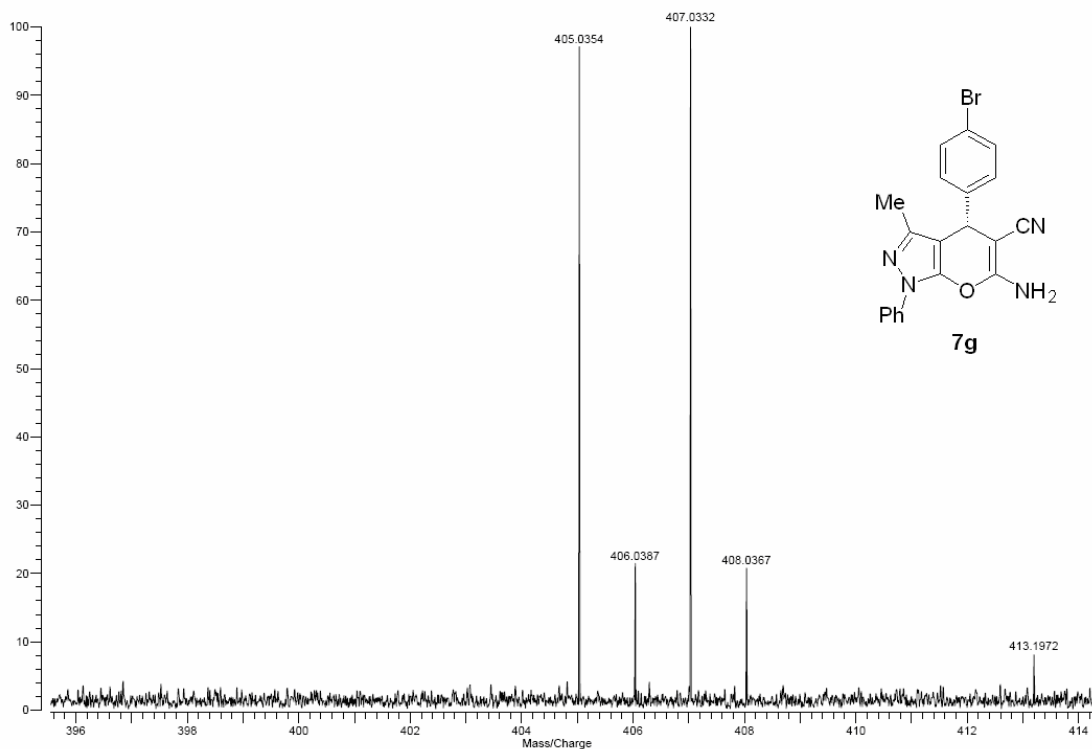

Varian QFT-ESI  
File: 3-Br\_ESI.trans

Mode: Negative  
Scans: 1  
Date: 20-MAY-2013  
Time: 16:27:32  
Scale: 64.5608

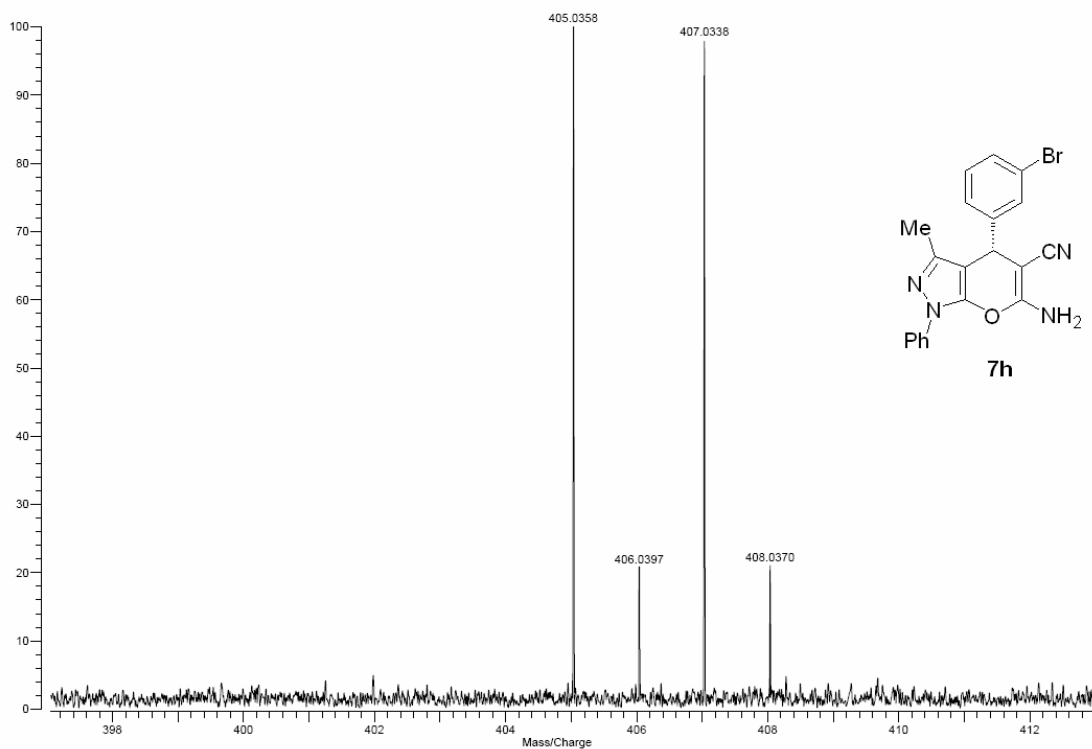

Varian QFT-ESI  
File: 2-Br\_ESI.trans

Mode: Negative  
Scans: 1  
Date: 20-MAY-2013  
Time: 16:26:51  
Scale: 47.7996

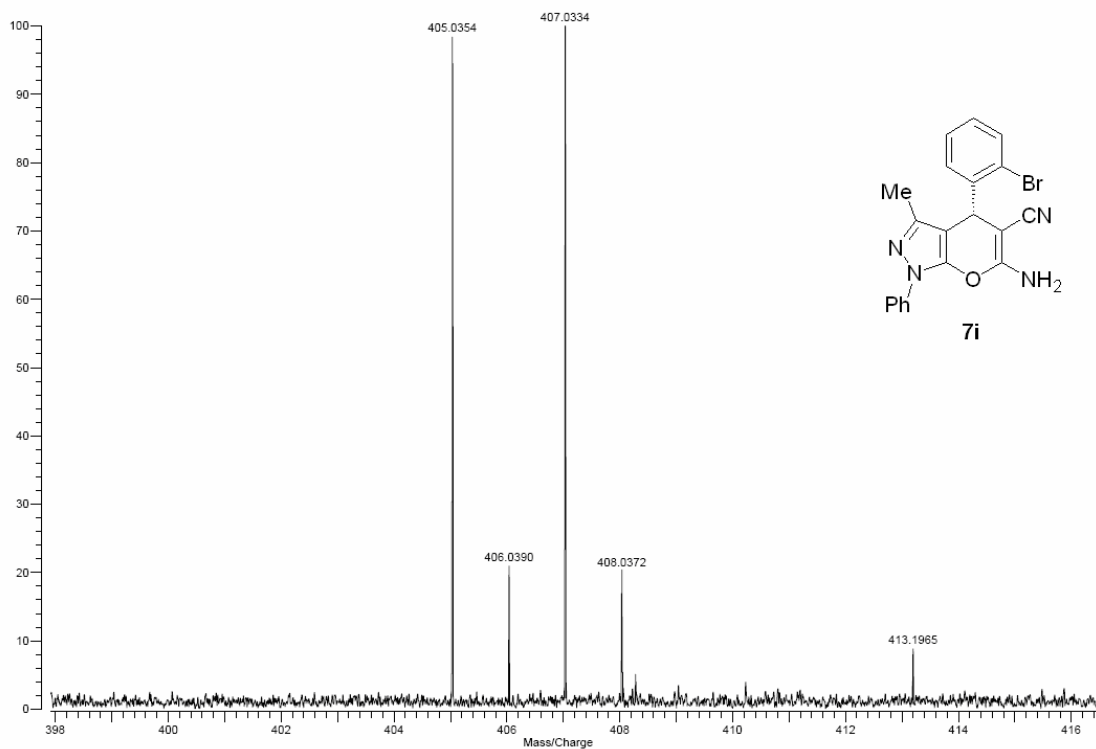

Varian ProMALDI  
File: ZZH-WHX-4-CF3-DHB-LASER60.trans

Mode: Positive  
Scans: 1  
Date: 24-MAY-2013  
Time: 12:57:51  
Scale: 9.2864

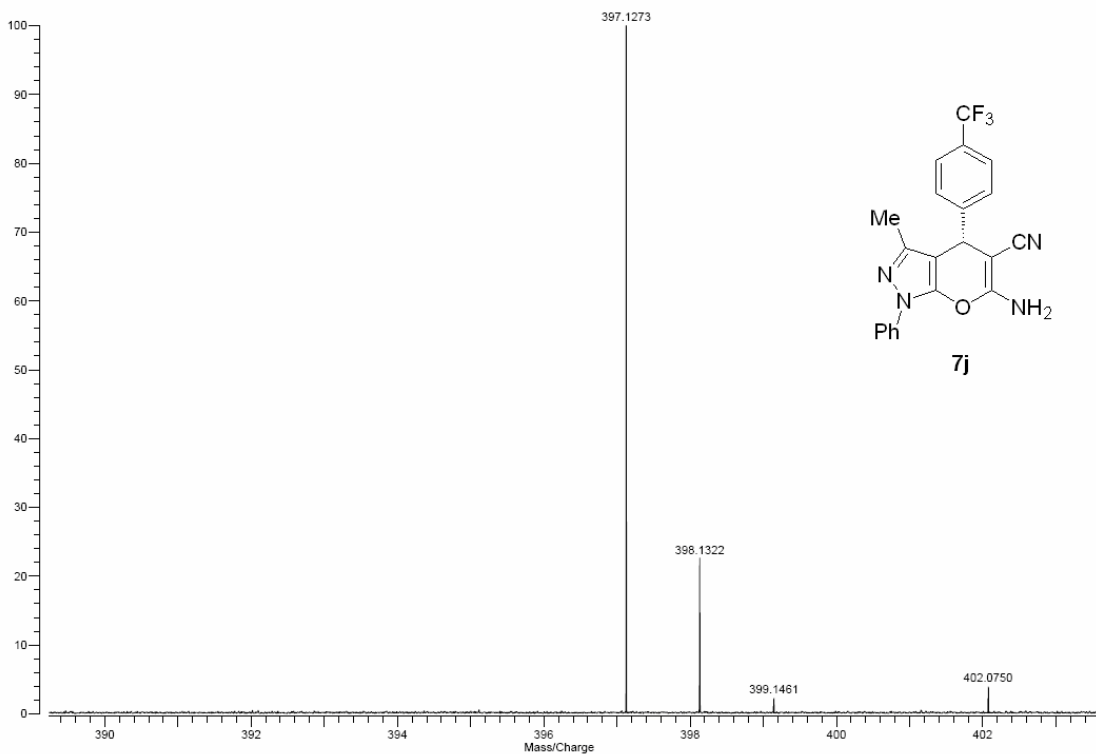



Varian ProMALDI  
File: ZZH-WHX-3-CF3-DHB-LASER60.trans

Mode: Positive  
Scans: 1  
Date: 24-MAY-2013  
Time: 14:48:39  
Scale: 6.4981

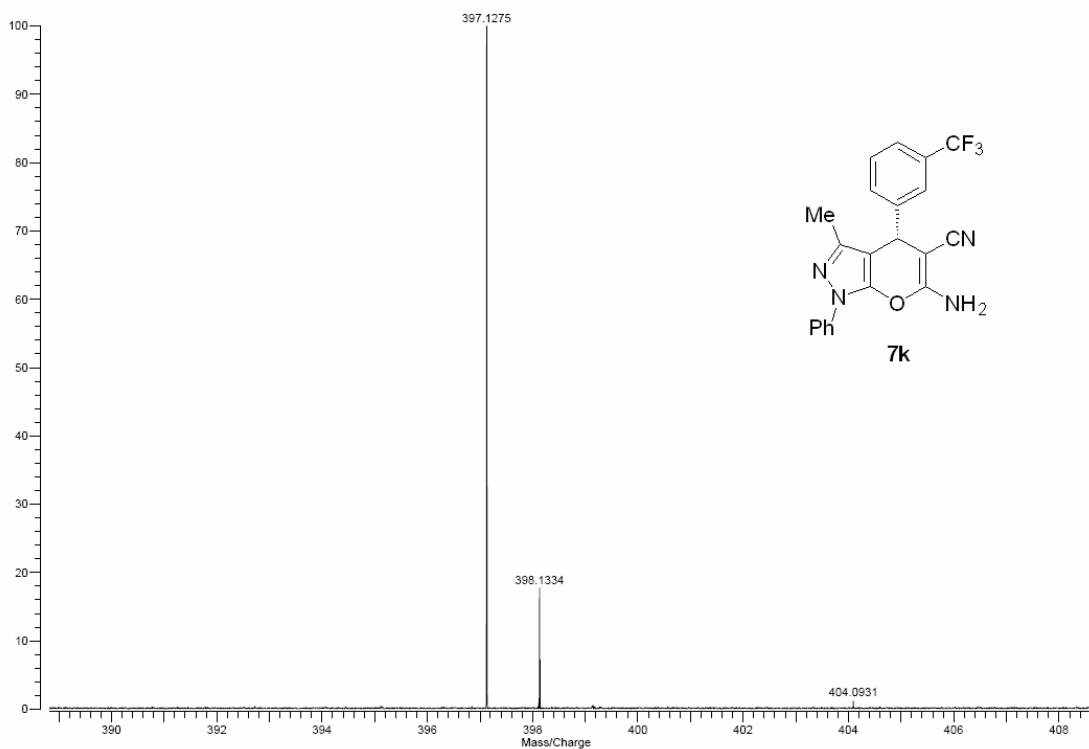

Varian ProMALDI  
File: ZZH-WHX-3-NO2-DHB-LASER60.trans

Mode: Positive  
Scans: 1  
Date: 24-MAY-2013  
Time: 15:12:32  
Scale: 25.0612

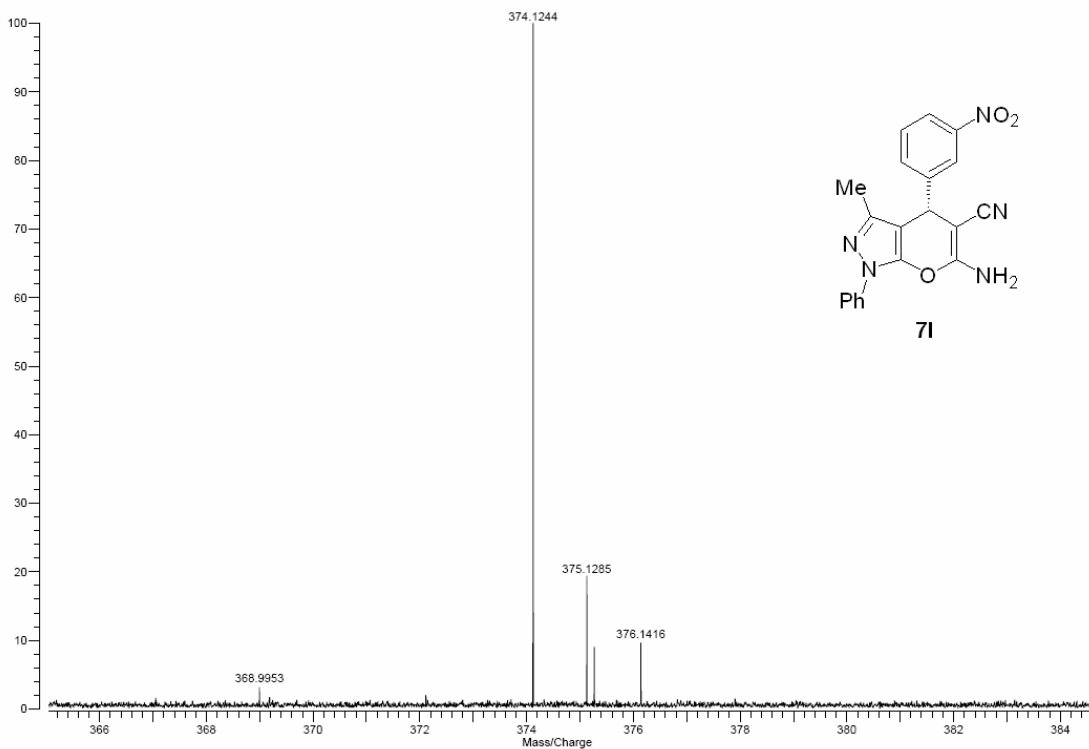

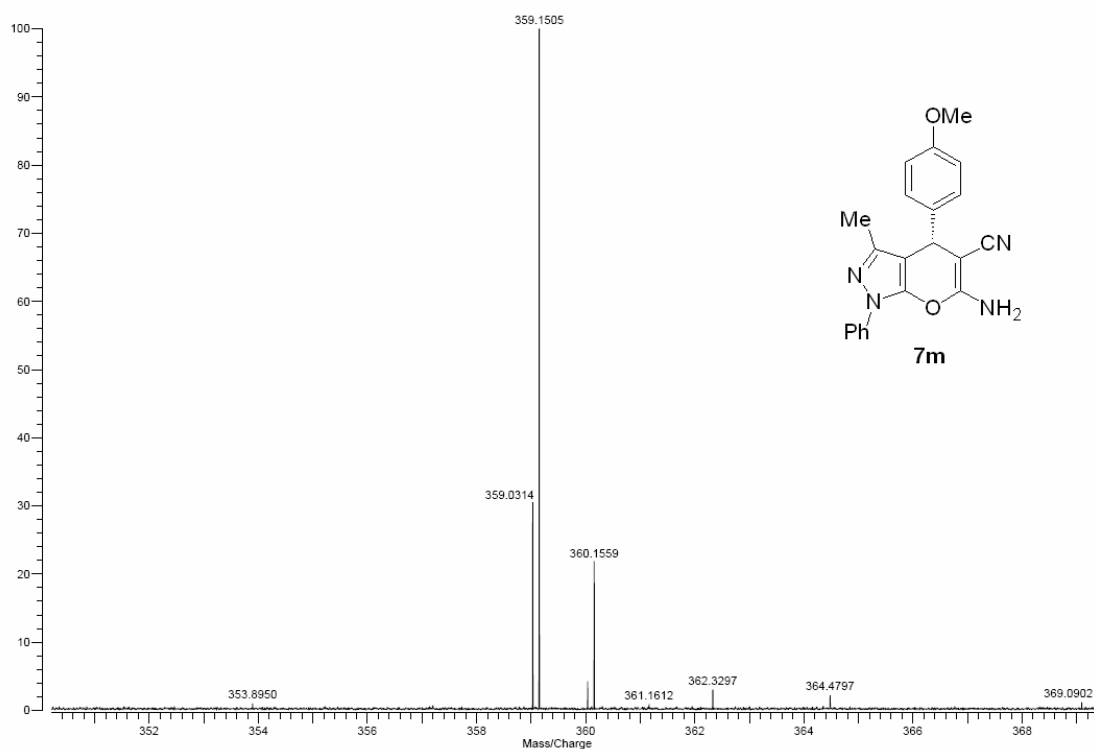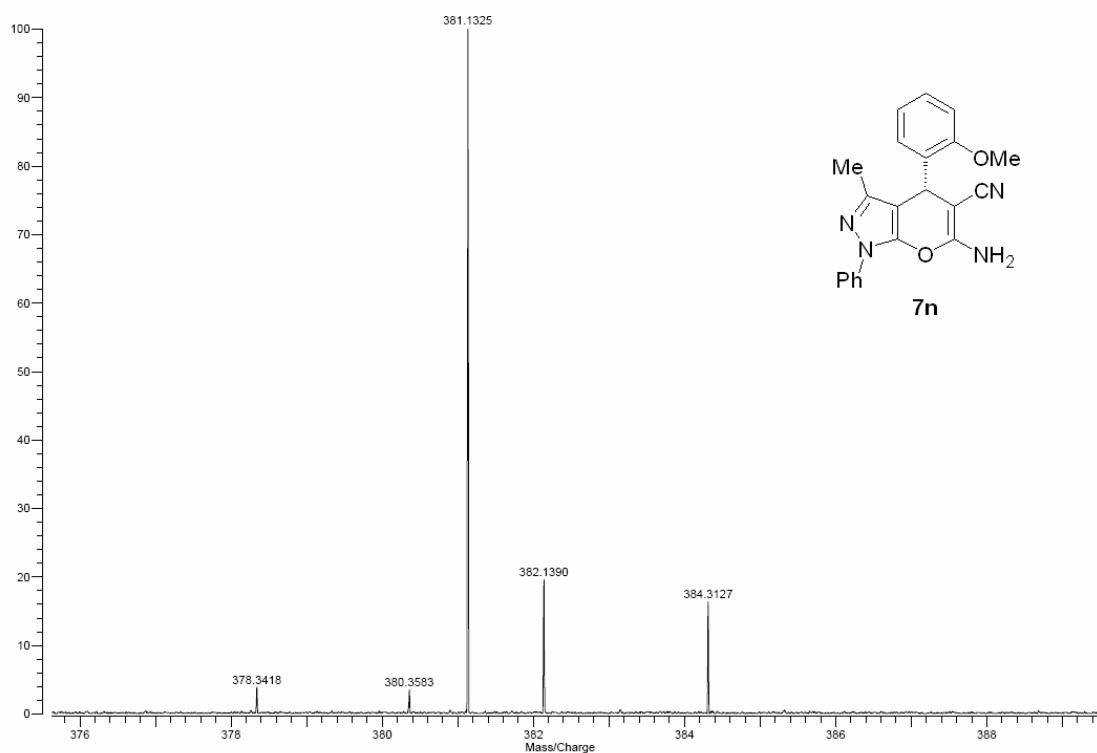

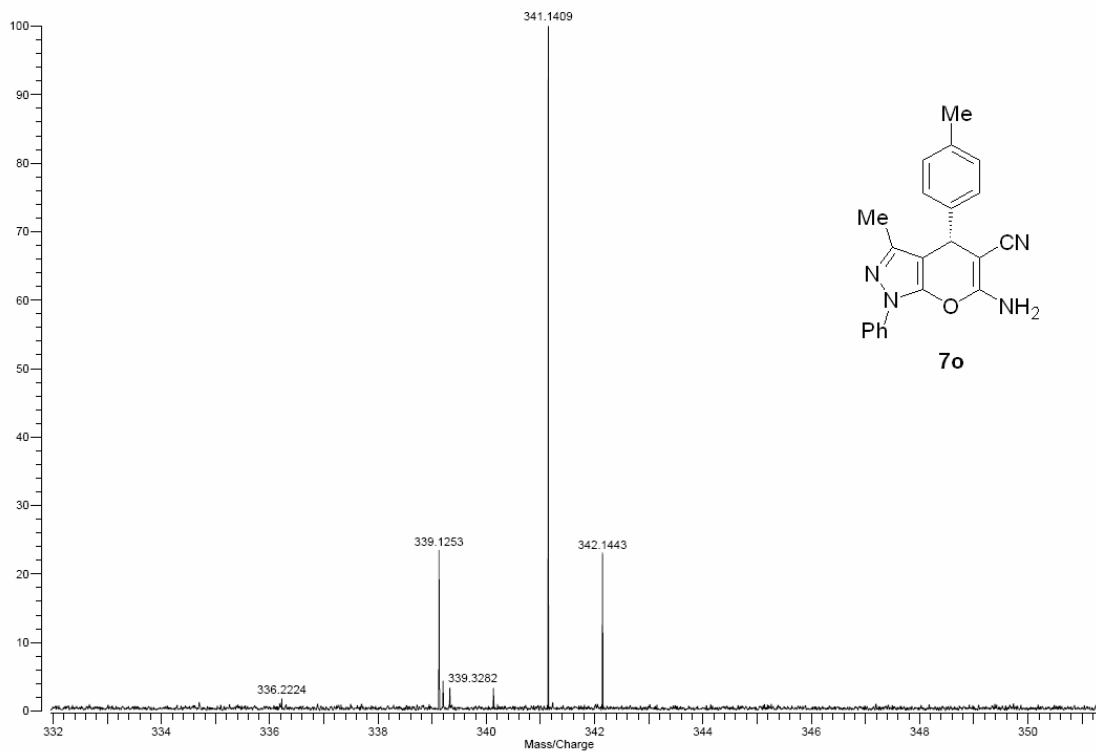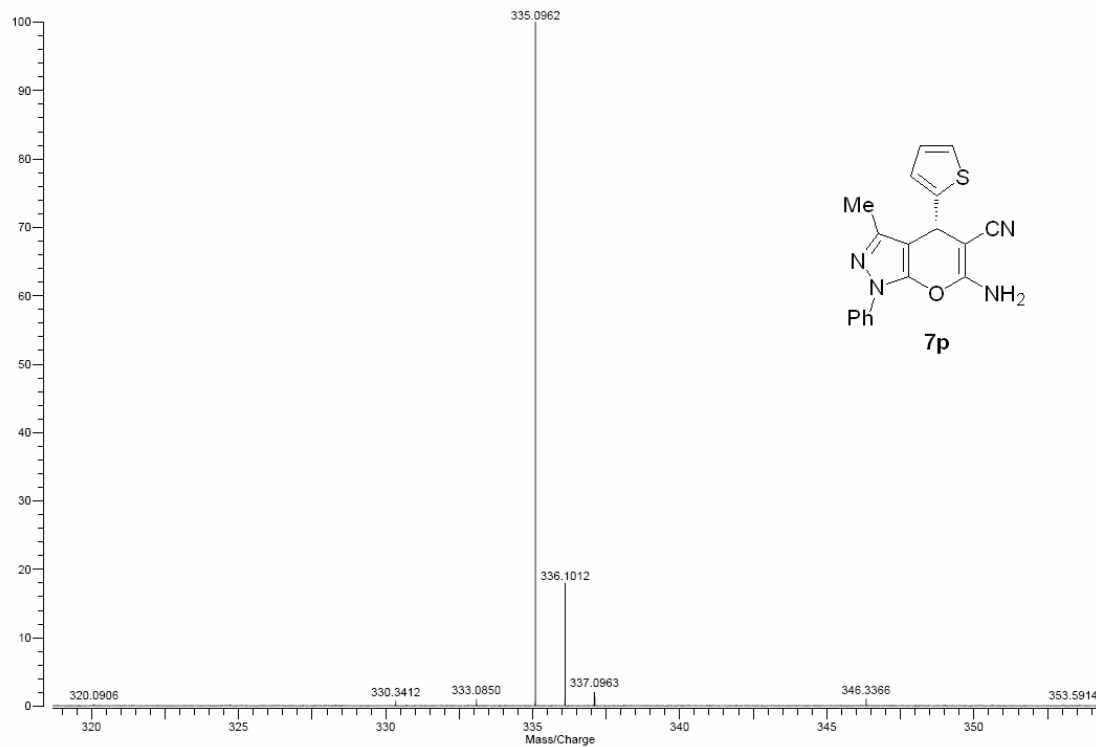

|               |       |             |           |                 |              |                        |                       |
|---------------|-------|-------------|-----------|-----------------|--------------|------------------------|-----------------------|
| Sample Name   | lc/ms | Position    | P1-A3     | Instrument Name | Instrument 1 | User Name              |                       |
| Inj Vol       | 3     | InjPosition |           | SampleType      | Sample       | IRM Calibration Status | Some Ions Missed      |
| Data Filename | D-P.d | ACQ Method  | chen-ms.m | Comment         |              | Acquired Time          | 6/17/2013 11:34:15 AM |

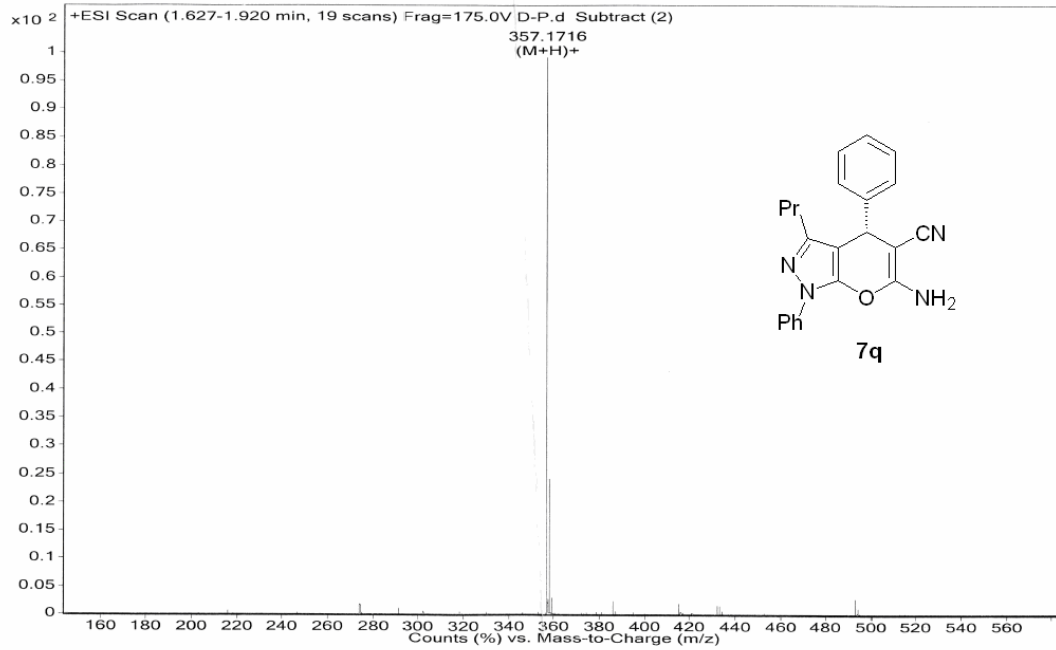

|               |            |             |           |                 |              |                        |                      |
|---------------|------------|-------------|-----------|-----------------|--------------|------------------------|----------------------|
| Sample Name   | lc/ms      | Position    | P1-A4     | Instrument Name | Instrument 1 | User Name              |                      |
| Inj Vol       | -1         | InjPosition |           | SampleType      | Sample       | IRM Calibration Status | Some Ions Missed     |
| Data Filename | WL140414.d | ACQ Method  | chen-ms.m | Comment         |              | Acquired Time          | 4/17/2015 9:46:56 AM |

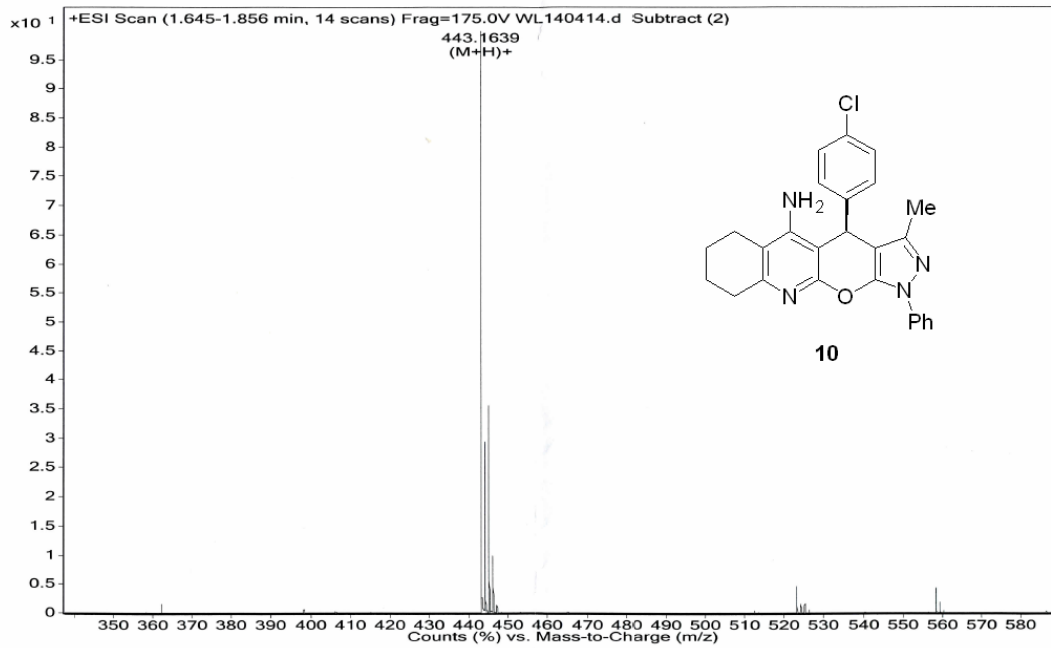

### 3. Copies of HPLC data

#### <Chromatogram>

mV

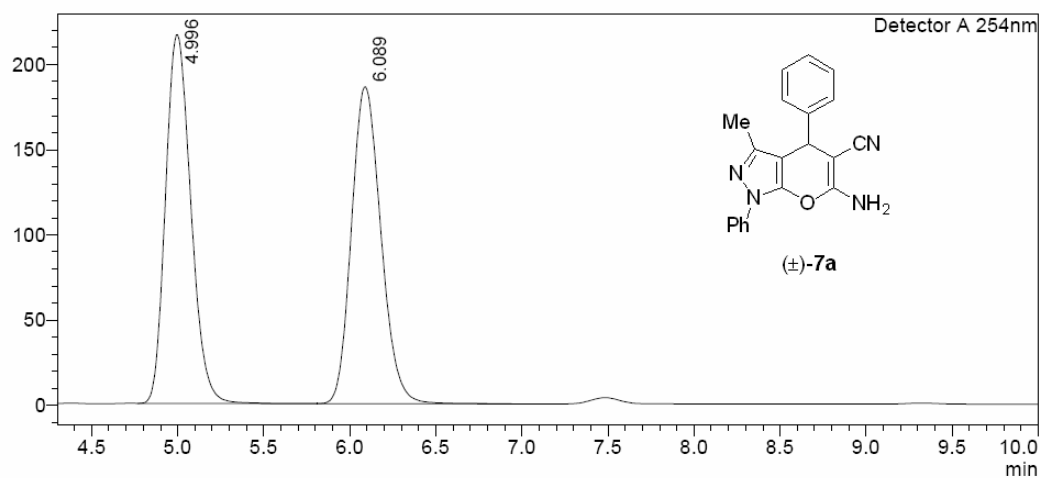

#### <Peak Table>

| Detector A 254nm |           |         |        |         |         |
|------------------|-----------|---------|--------|---------|---------|
| Peak#            | Ret. Time | Area    | Height | Height% | Area%   |
| 1                | 4.996     | 2218565 | 216367 | 53.760  | 49.977  |
| 2                | 6.089     | 2220565 | 186101 | 46.240  | 50.023  |
| Total            |           | 4439129 | 402468 | 100.000 | 100.000 |

#### <Chromatogram>

mV

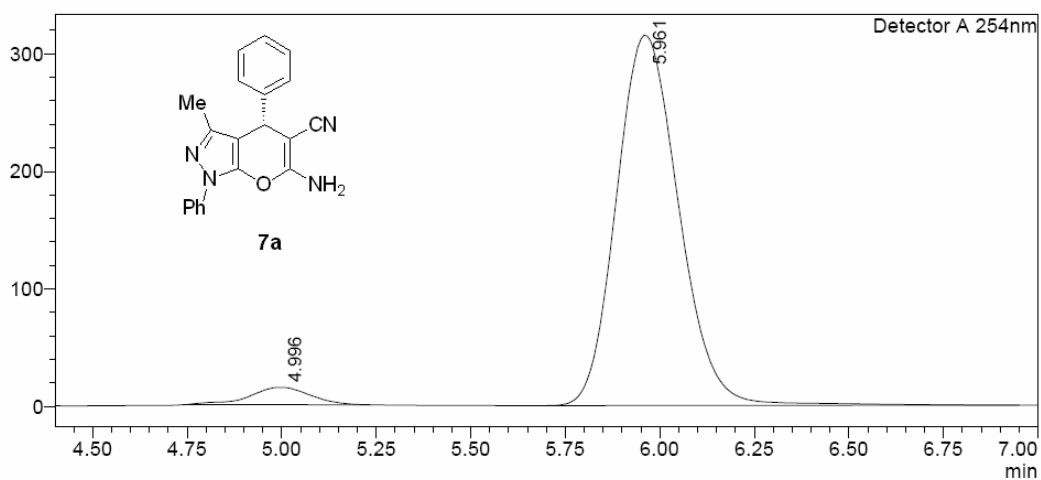

#### <Peak Table>

| Detector A 254nm |           |         |        |         |         |
|------------------|-----------|---------|--------|---------|---------|
| Peak#            | Ret. Time | Area    | Height | Height% | Area%   |
| 1                | 4.996     | 162201  | 14682  | 4.456   | 4.286   |
| 2                | 5.961     | 3622606 | 314788 | 95.544  | 95.714  |
| Total            |           | 3784807 | 329470 | 100.000 | 100.000 |

### <Chromatogram>

mV

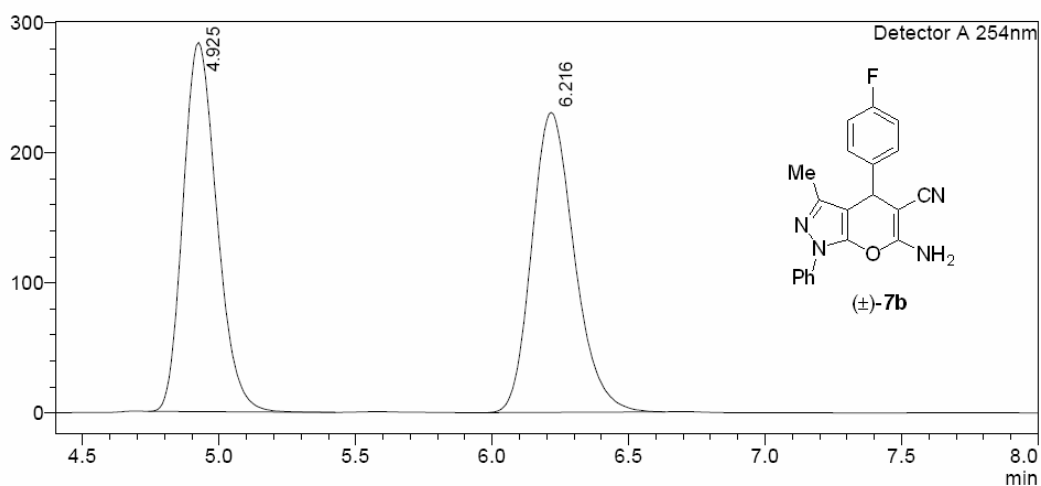

### <Peak Table>

Detector A 254nm

| Peak# | Ret. Time | Area    | Height | Height% | Area%   |
|-------|-----------|---------|--------|---------|---------|
| 1     | 4.925     | 2446516 | 283771 | 55.165  | 49.406  |
| 2     | 6.216     | 2505358 | 230637 | 44.835  | 50.594  |
| Total |           | 4951874 | 514408 | 100.000 | 100.000 |

### <Chromatogram>

mV

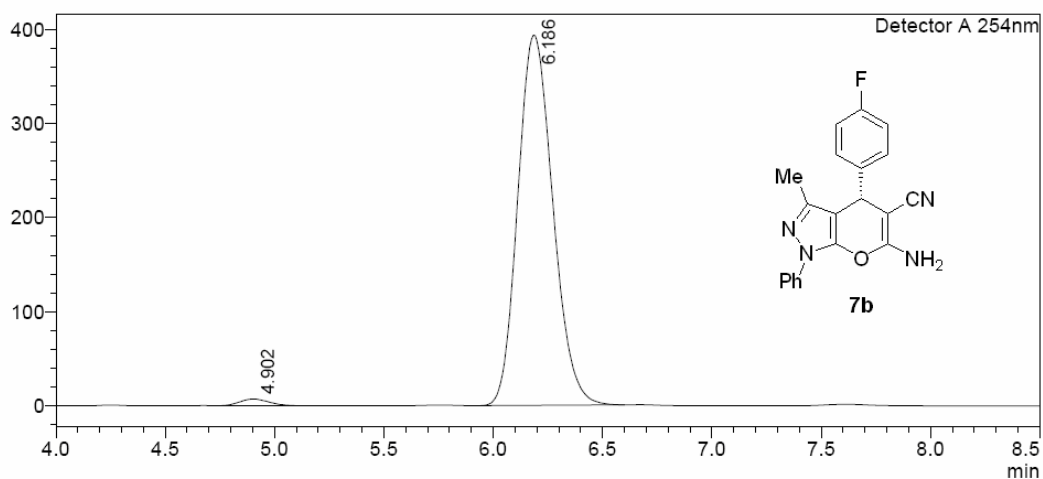

### <Peak Table>

Detector A 254nm

| Peak# | Ret. Time | Area    | Height | Height% | Area%   |
|-------|-----------|---------|--------|---------|---------|
| 1     | 4.902     | 64568   | 7013   | 1.751   | 1.450   |
| 2     | 6.186     | 4388776 | 393515 | 98.249  | 98.550  |
| Total |           | 4453343 | 400529 | 100.000 | 100.000 |

### <Chromatogram>

mV

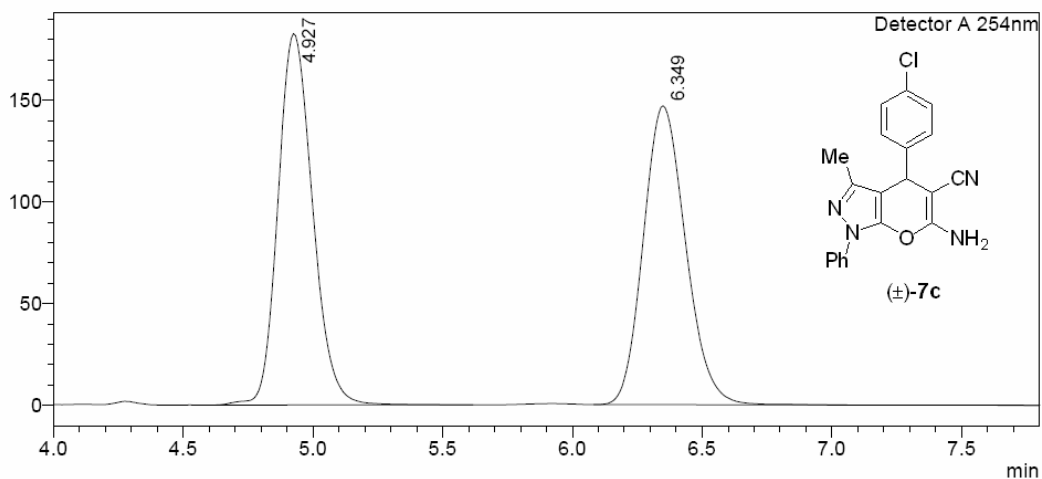

### <Peak Table>

| Detector A 254nm |           |        |             |         |         |  |
|------------------|-----------|--------|-------------|---------|---------|--|
| Peak#            | Ret. Time | Conc.  | Area/Height | Height% | Area%   |  |
| 1                | 4.927     | 50.419 | 9.289       | 55.405  | 50.419  |  |
| 2                | 6.349     | 49.581 | 11.349      | 44.595  | 49.581  |  |
| Total            |           |        |             | 100.000 | 100.000 |  |

### <Chromatogram>

mV

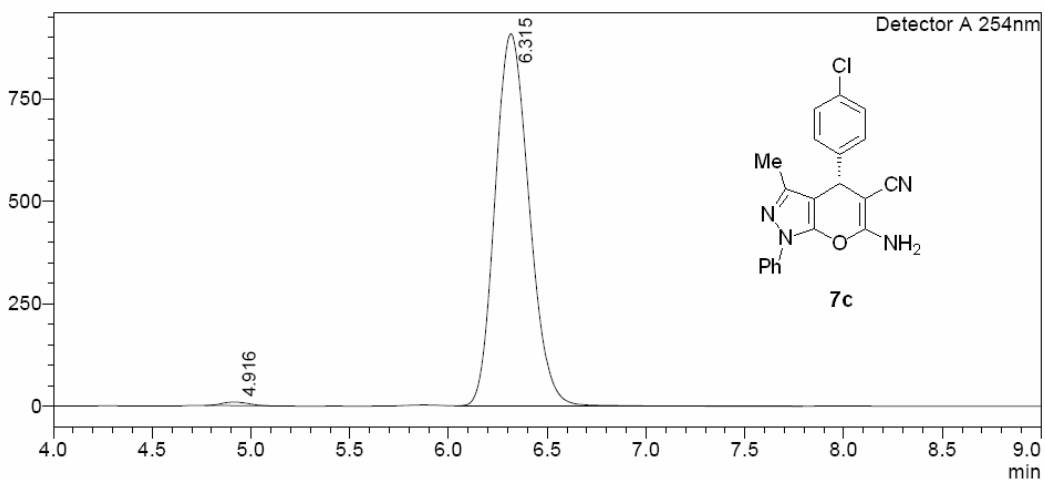

### <Peak Table>

| Detector A 254nm |           |          |        |        |         |         |
|------------------|-----------|----------|--------|--------|---------|---------|
| Peak#            | Ret. Time | Area     | Height | Conc.  | Height% | Area%   |
| 1                | 4.916     | 79824    | 8600   | 0.728  | 0.938   | 0.728   |
| 2                | 6.315     | 10880117 | 907991 | 99.272 | 99.062  | 99.272  |
| Total            |           | 10959941 | 916591 |        | 100.000 | 100.000 |

### <Chromatogram>

mV

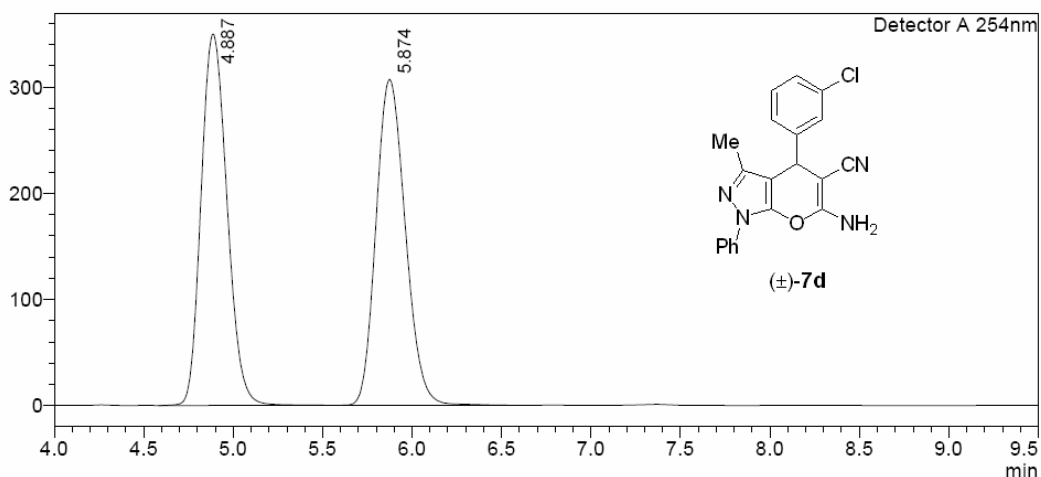

### <Peak Table>

Detector A 254nm

| Peak# | Ret. Time | Area    | Height | Height% | Area%   |
|-------|-----------|---------|--------|---------|---------|
| 1     | 4.887     | 3523325 | 349196 | 53.220  | 50.186  |
| 2     | 5.874     | 3497198 | 306946 | 46.780  | 49.814  |
| Total |           | 7020523 | 656142 | 100.000 | 100.000 |

### <Chromatogram>

mV

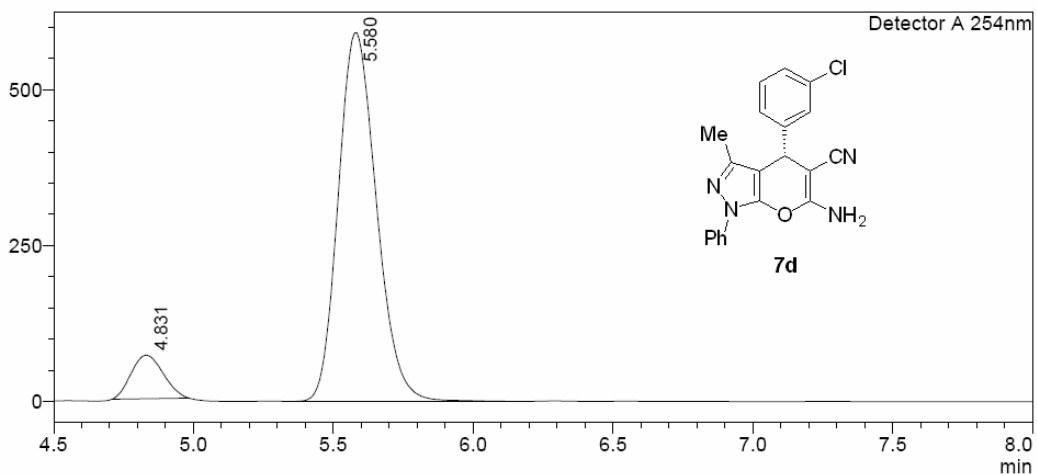

### <Peak Table>

Detector A 254nm

| Peak# | Ret. Time | Area    | Height | Height% | Area%   |
|-------|-----------|---------|--------|---------|---------|
| 1     | 4.831     | 555600  | 69806  | 10.571  | 9.012   |
| 2     | 5.580     | 5609729 | 590520 | 89.429  | 90.988  |
| Total |           | 6165328 | 660325 | 100.000 | 100.000 |



### <Chromatogram>

mV

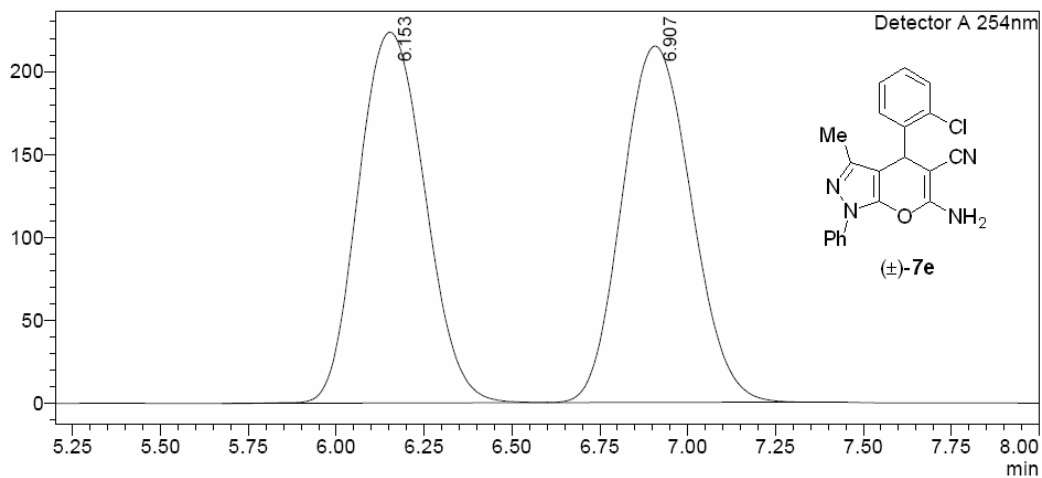

### <Peak Table>

| Detector A 254nm |           |         |        |         |         |
|------------------|-----------|---------|--------|---------|---------|
| Peak#            | Ret. Time | Area    | Height | Height% | Area%   |
| 1                | 6.153     | 2945122 | 223426 | 50.988  | 49.921  |
| 2                | 6.907     | 2954392 | 214767 | 49.012  | 50.079  |
| Total            |           | 5899514 | 438193 | 100.000 | 100.000 |

### <Chromatogram>

mV

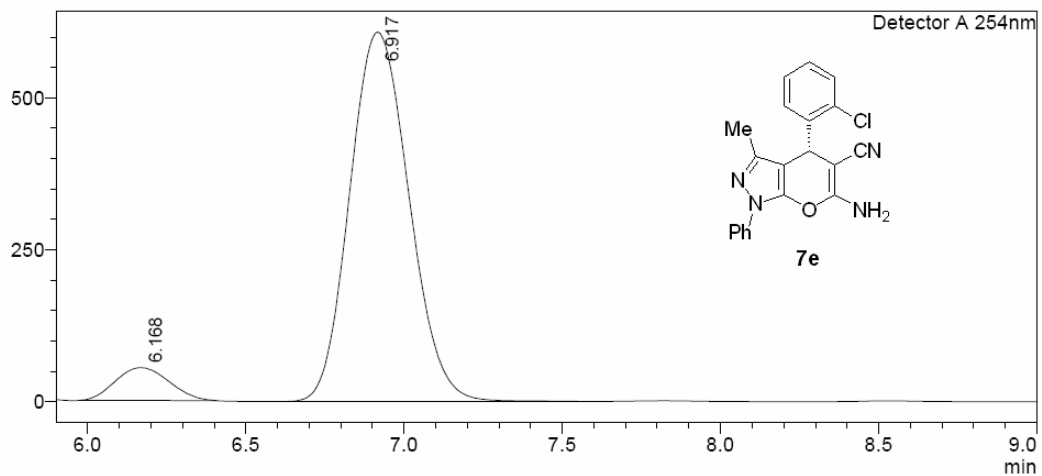

### <Peak Table>

| Detector A 254nm |           |         |        |         |         |
|------------------|-----------|---------|--------|---------|---------|
| Peak#            | Ret. Time | Area    | Height | Height% | Area%   |
| 1                | 6.168     | 638818  | 54120  | 8.177   | 7.460   |
| 2                | 6.917     | 7924180 | 607766 | 91.823  | 92.540  |
| Total            |           | 8562998 | 661886 | 100.000 | 100.000 |

### <Chromatogram>

mV

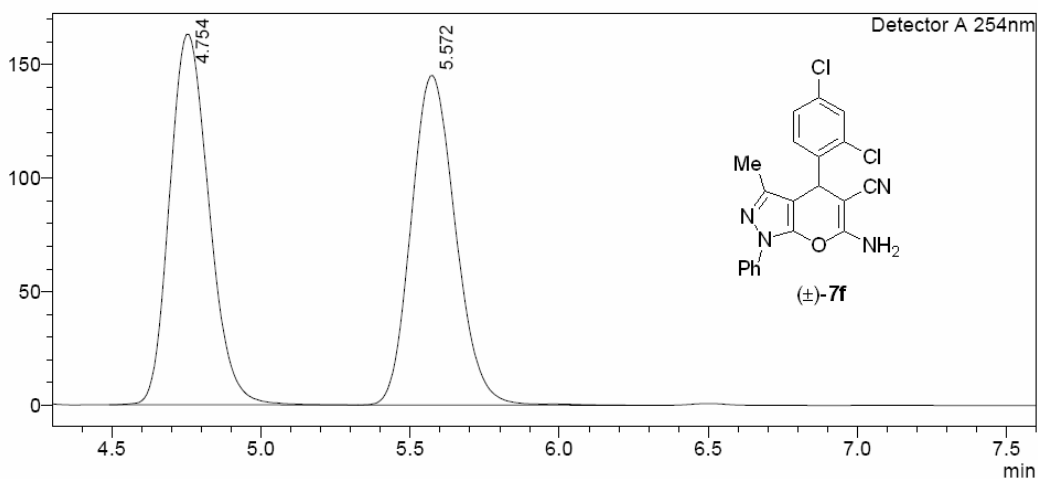

### <Peak Table>

Detector A 254nm

| Peak# | Ret. Time | Area    | Height | Height% | Area%   |
|-------|-----------|---------|--------|---------|---------|
| 1     | 4.754     | 1503065 | 162993 | 52.905  | 50.044  |
| 2     | 5.572     | 1500431 | 145095 | 47.095  | 49.956  |
| Total |           | 3003497 | 308089 | 100.000 | 100.000 |

### <Chromatogram>

mV

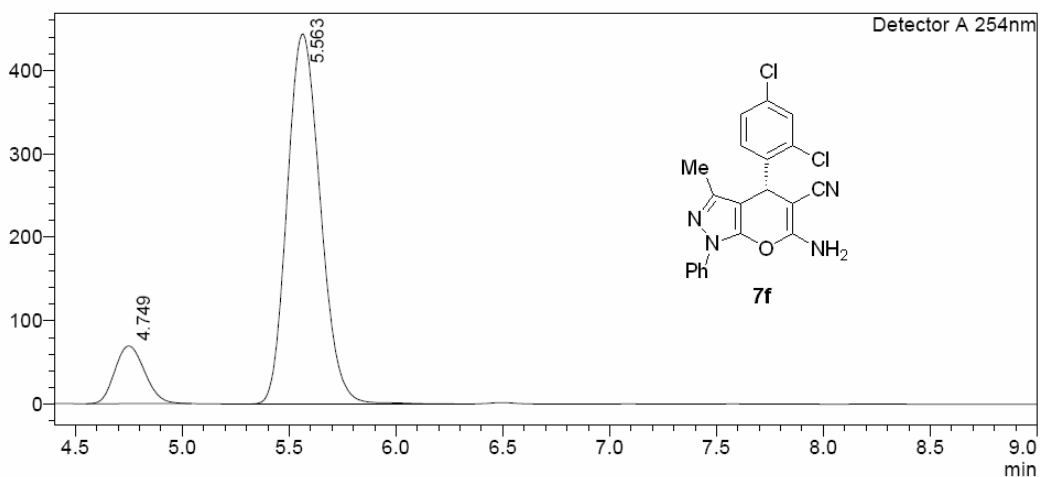

### <Peak Table>

Detector A 254nm

| Peak# | Ret. Time | Area    | Height | Height% | Area%   |
|-------|-----------|---------|--------|---------|---------|
| 1     | 4.749     | 669937  | 69064  | 13.489  | 12.268  |
| 2     | 5.563     | 4790785 | 442925 | 86.511  | 87.732  |
| Total |           | 5460722 | 511990 | 100.000 | 100.000 |

### <Chromatogram>

mV

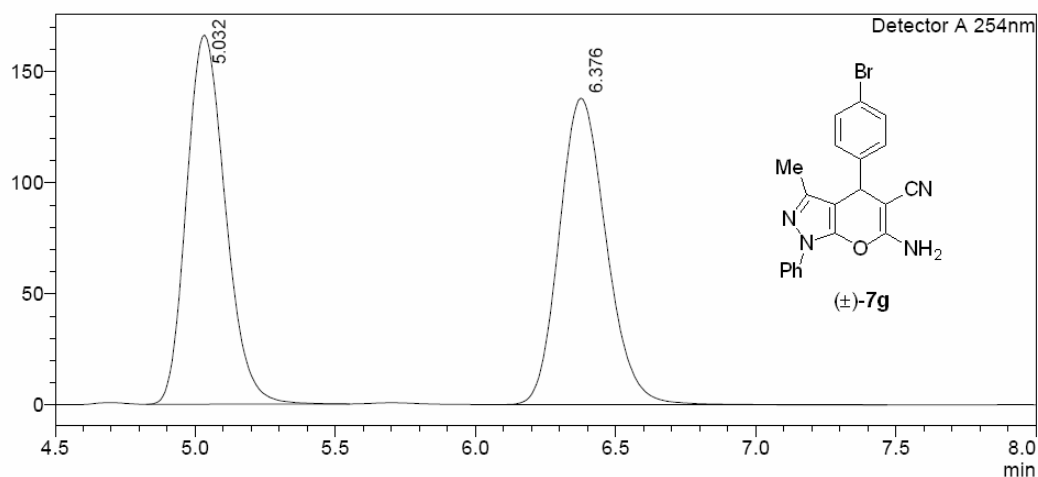

### <Peak Table>

Detector A 254nm

| Peak# | Ret. Time | Area    | Height | Height% | Area%   |
|-------|-----------|---------|--------|---------|---------|
| 1     | 5.032     | 1606230 | 166140 | 54.632  | 49.893  |
| 2     | 6.376     | 1613117 | 137969 | 45.368  | 50.107  |
| Total |           | 3219346 | 304109 | 100.000 | 100.000 |

### <Chromatogram>

mV

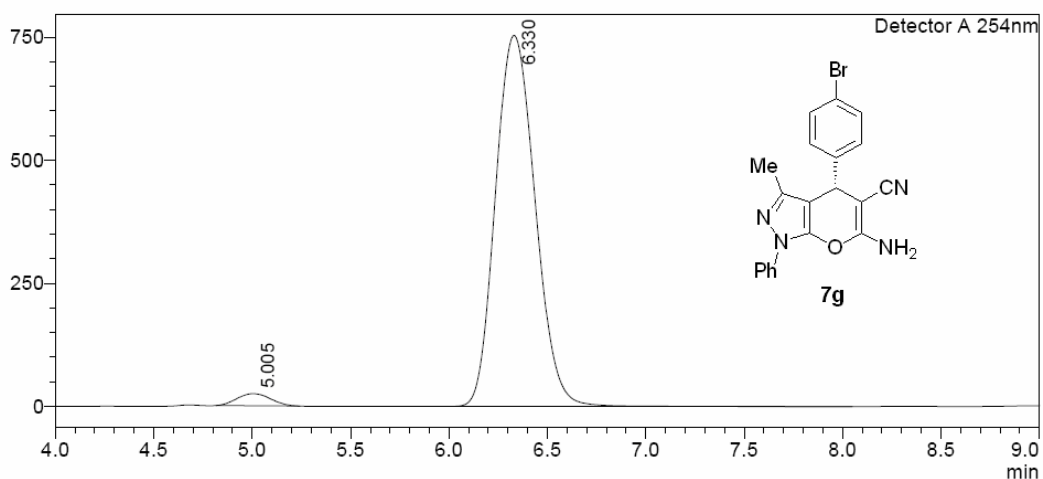

### <Peak Table>

Detector A 254nm

| Peak# | Ret. Time | Area     | Height | Height% | Area%   |
|-------|-----------|----------|--------|---------|---------|
| 1     | 5.005     | 290322   | 24500  | 3.150   | 2.676   |
| 2     | 6.330     | 10559422 | 753205 | 96.850  | 97.324  |
| Total |           | 10849744 | 777705 | 100.000 | 100.000 |

### <Chromatogram>

mV

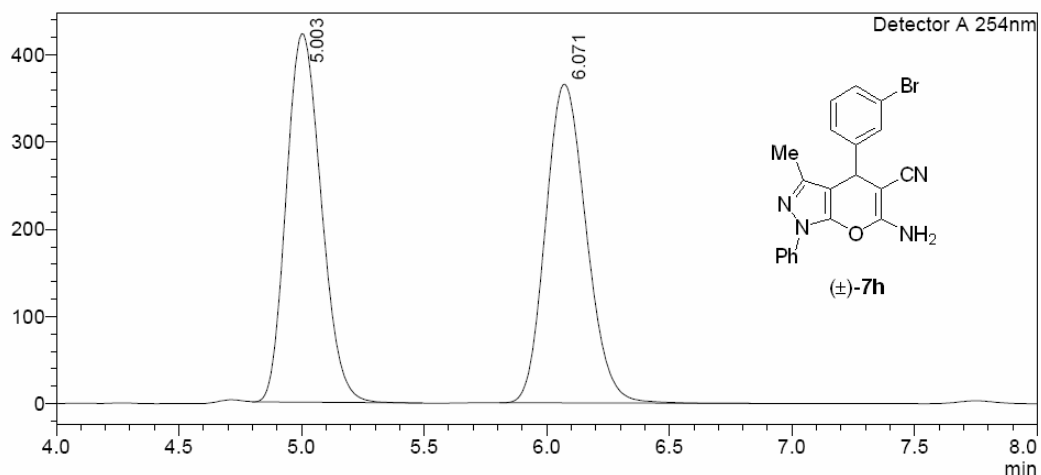

### <Peak Table>

| Detector A 254nm |           |        |        |         |         |         |
|------------------|-----------|--------|--------|---------|---------|---------|
| Peak#            | Ret. Time | Conc.  | Height | Area    | Height% | Area%   |
| 1                | 5.003     | 49.840 | 421993 | 4199374 | 53.598  | 49.840  |
| 2                | 6.071     | 50.160 | 365342 | 4226311 | 46.402  | 50.160  |
| Total            |           |        | 787335 | 8425685 | 100.000 | 100.000 |

### <Chromatogram>

mV

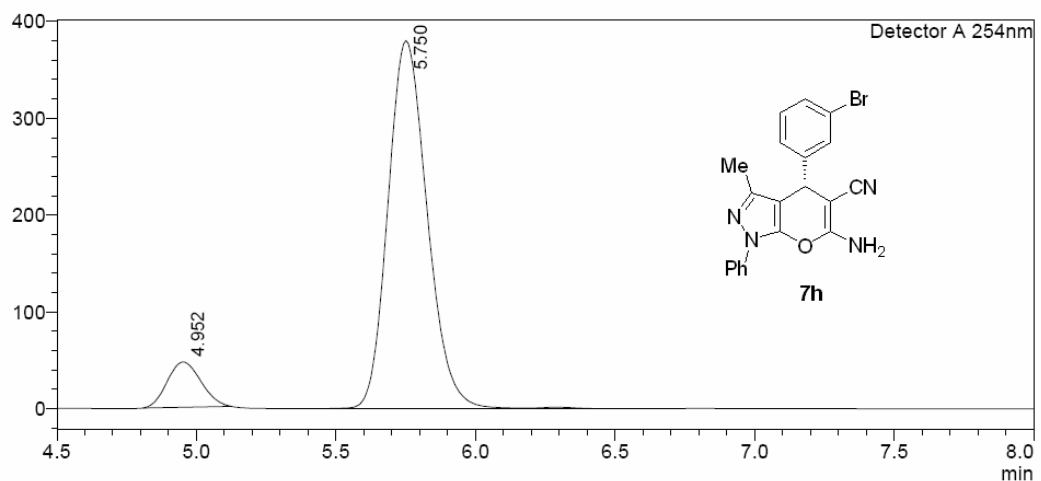

### <Peak Table>

| Detector A 254nm |           |         |        |         |         |
|------------------|-----------|---------|--------|---------|---------|
| Peak#            | Ret. Time | Area    | Height | Height% | Area%   |
| 1                | 4.952     | 392318  | 46735  | 10.935  | 9.457   |
| 2                | 5.750     | 3755985 | 380648 | 89.065  | 90.543  |
| Total            |           | 4148303 | 427383 | 100.000 | 100.000 |

### <Chromatogram>

mV

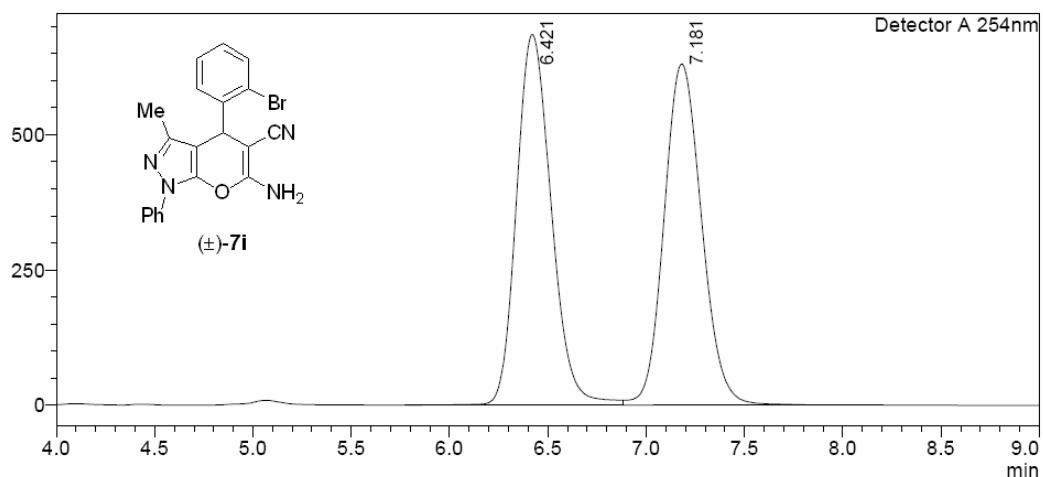

### <Peak Table>

| Detector A 254nm |           |        |         |          |         |         |
|------------------|-----------|--------|---------|----------|---------|---------|
| Peak#            | Ret. Time | Conc.  | Height  | Area     | Height% | Area%   |
| 1                | 6.421     | 50.217 | 683980  | 8421993  | 52.067  | 50.217  |
| 2                | 7.181     | 49.783 | 629682  | 8349290  | 47.933  | 49.783  |
| Total            |           |        | 1313662 | 16771283 | 100.000 | 100.000 |

### <Chromatogram>

mV

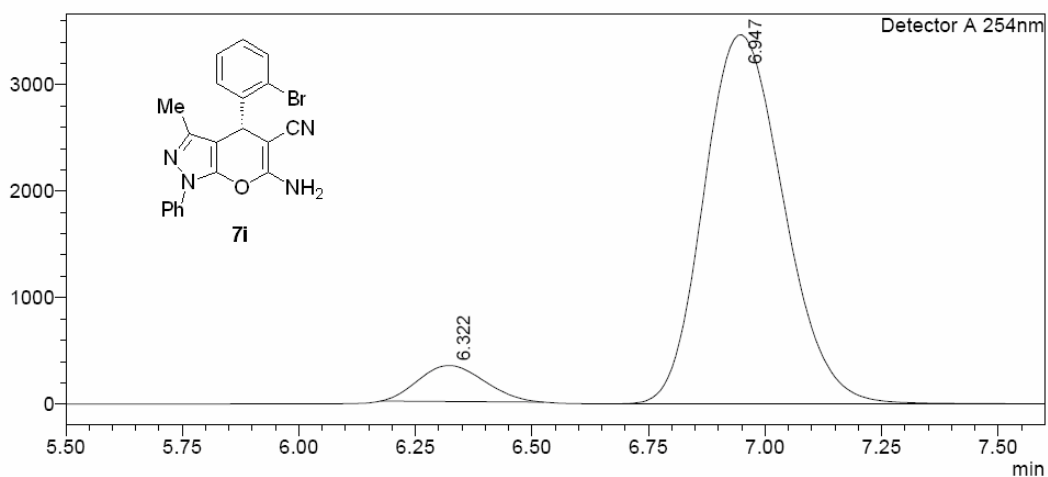

### <Peak Table>

| Detector A 254nm |           |          |         |         |         |
|------------------|-----------|----------|---------|---------|---------|
| Peak#            | Ret. Time | Area     | Height  | Height% | Area%   |
| 1                | 6.322     | 3352349  | 338840  | 8.904   | 7.519   |
| 2                | 6.947     | 41235262 | 3466734 | 91.096  | 92.481  |
| Total            |           | 44587612 | 3805574 | 100.000 | 100.000 |

### <Chromatogram>

mV

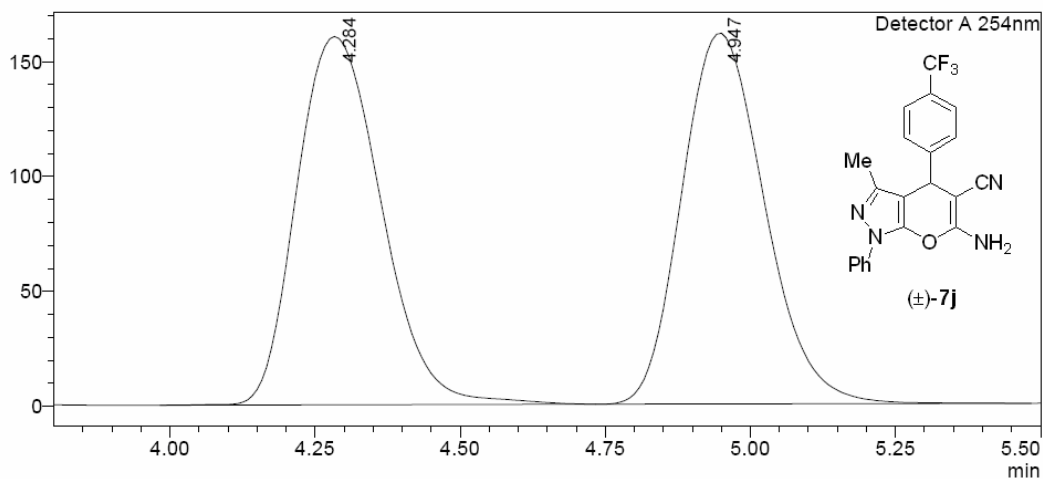

### <Peak Table>

| Detector A 254nm |           |         |        |         |         |
|------------------|-----------|---------|--------|---------|---------|
| Peak#            | Ret. Time | Area    | Height | Height% | Area%   |
| 1                | 4.284     | 1625373 | 160332 | 49.842  | 50.316  |
| 2                | 4.947     | 1604985 | 161348 | 50.158  | 49.684  |
| Total            |           | 3230358 | 321680 | 100.000 | 100.000 |

### <Chromatogram>

mV

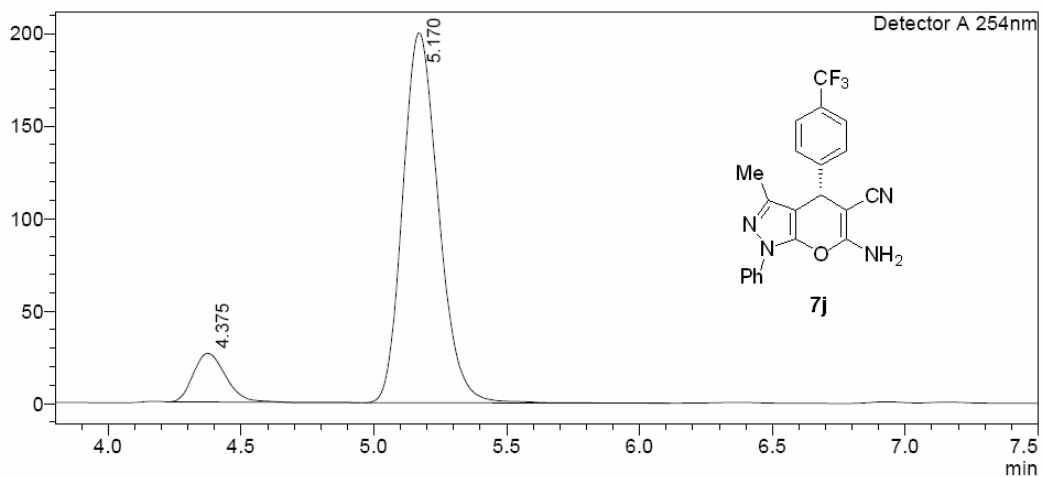

### <Peak Table>

| Detector A 254nm |           |         |        |         |         |
|------------------|-----------|---------|--------|---------|---------|
| Peak#            | Ret. Time | Area    | Height | Area%   | Height% |
| 1                | 4.375     | 224324  | 26274  | 10.687  | 11.624  |
| 2                | 5.170     | 1874779 | 199762 | 89.313  | 88.376  |
| Total            |           | 2099103 | 226036 | 100.000 | 100.000 |

### <Chromatogram>

mV

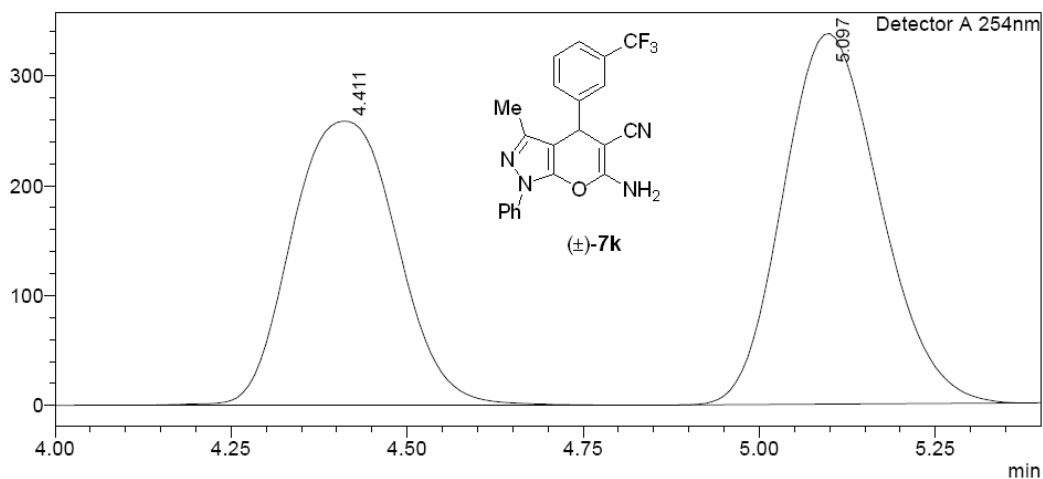

### <Peak Table>

Detector A 254nm

| Peak# | Ret. Time | Area    | Height | Height% | Area%   |
|-------|-----------|---------|--------|---------|---------|
| 1     | 4.411     | 2687069 | 258525 | 43.379  | 45.410  |
| 2     | 5.097     | 3230289 | 337447 | 56.621  | 54.590  |
| Total |           | 5917357 | 595972 | 100.000 | 100.000 |

### <Chromatogram>

mV

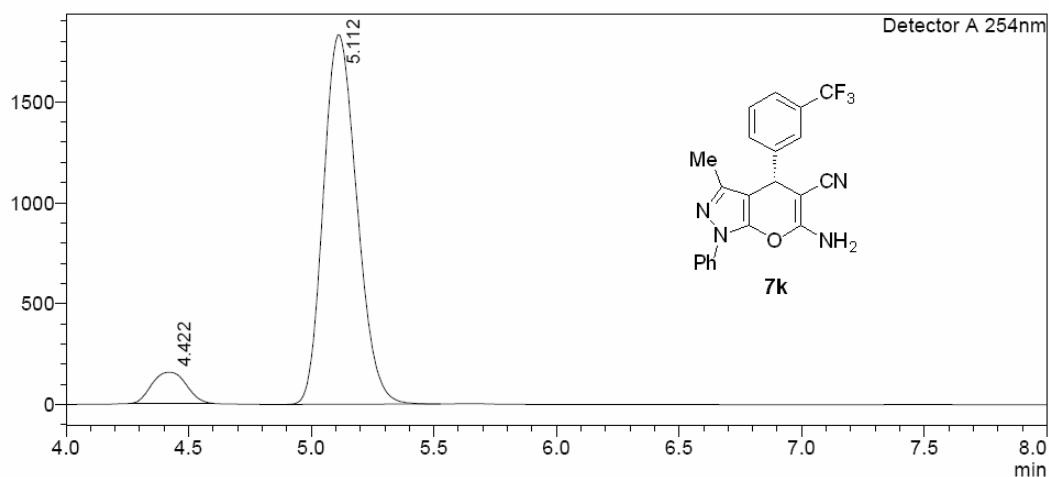

### <Peak Table>

Detector A 254nm

| Peak# | Ret. Time | Area     | Height  | Height% | Area%   |
|-------|-----------|----------|---------|---------|---------|
| 1     | 4.422     | 1495302  | 154036  | 7.764   | 7.887   |
| 2     | 5.112     | 17462984 | 1829863 | 92.236  | 92.113  |
| Total |           | 18958286 | 1983899 | 100.000 | 100.000 |

### <Chromatogram>

mV

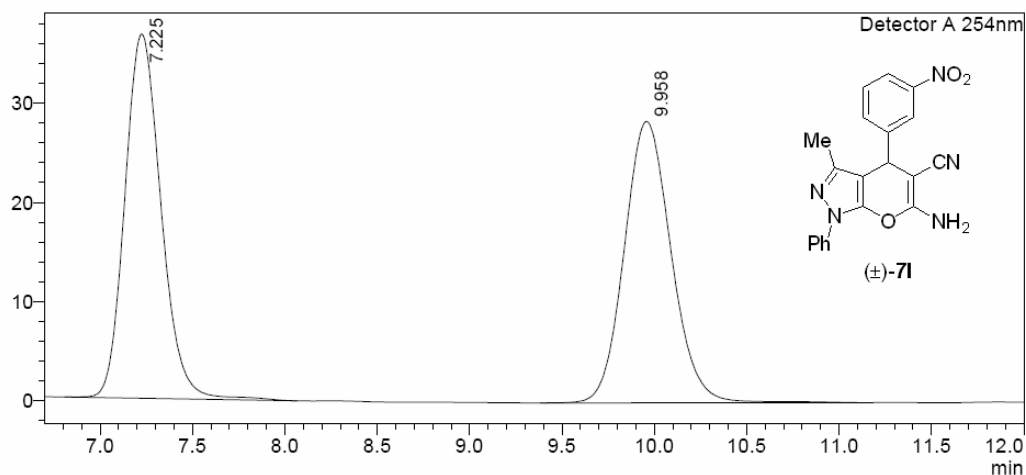

### <Peak Table>

Detector A 254nm

| Peak# | Ret. Time | Area    | Height | Height% | Area%   |
|-------|-----------|---------|--------|---------|---------|
| 1     | 7.225     | 501370  | 36734  | 56.427  | 50.000  |
| 2     | 9.958     | 501364  | 28366  | 43.573  | 50.000  |
| Total |           | 1002734 | 65100  | 100.000 | 100.000 |

### <Chromatogram>

mV

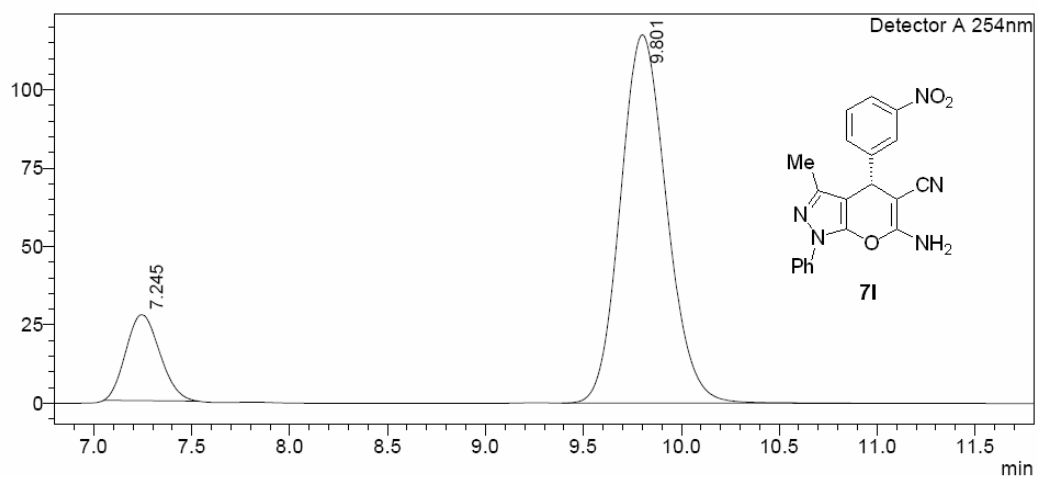

### <Peak Table>

Detector A 254nm

| Peak# | Ret. Time | Area    | Height | Height% | Area%   |
|-------|-----------|---------|--------|---------|---------|
| 1     | 7.245     | 331265  | 27400  | 18.913  | 14.637  |
| 2     | 9.801     | 1931906 | 117473 | 81.087  | 85.363  |
| Total |           | 2263171 | 144873 | 100.000 | 100.000 |



### <Chromatogram>

mV

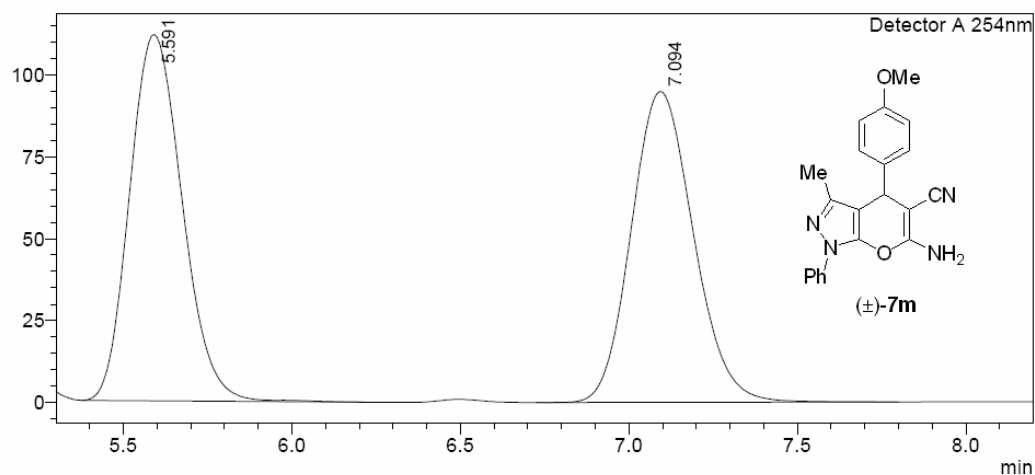

### <Peak Table>

| Detector A 254nm |           |         |        |         |         |
|------------------|-----------|---------|--------|---------|---------|
| Peak#            | Ret. Time | Area    | Height | Height% | Area%   |
| 1                | 5.591     | 1214730 | 111866 | 54.100  | 49.945  |
| 2                | 7.094     | 1217400 | 94911  | 45.900  | 50.055  |
| Total            |           | 2432130 | 206777 | 100.000 | 100.000 |

### <Chromatogram>

mV

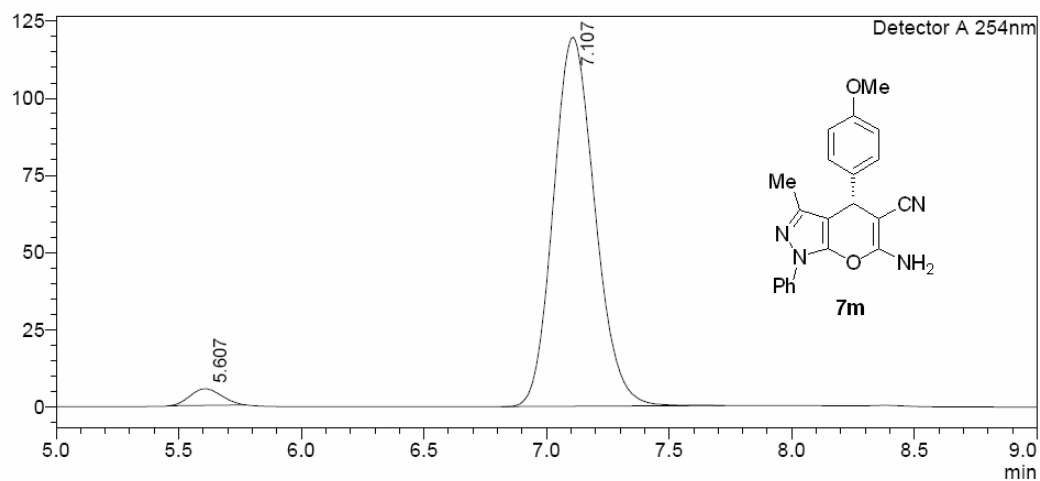

### <Peak Table>

| Detector A 254nm |           |         |        |         |         |
|------------------|-----------|---------|--------|---------|---------|
| Peak#            | Ret. Time | Area    | Height | Height% | Area%   |
| 1                | 5.607     | 48480   | 5425   | 4.337   | 3.319   |
| 2                | 7.107     | 1412055 | 119664 | 95.663  | 96.681  |
| Total            |           | 1460535 | 125088 | 100.000 | 100.000 |

### <Chromatogram>

mV

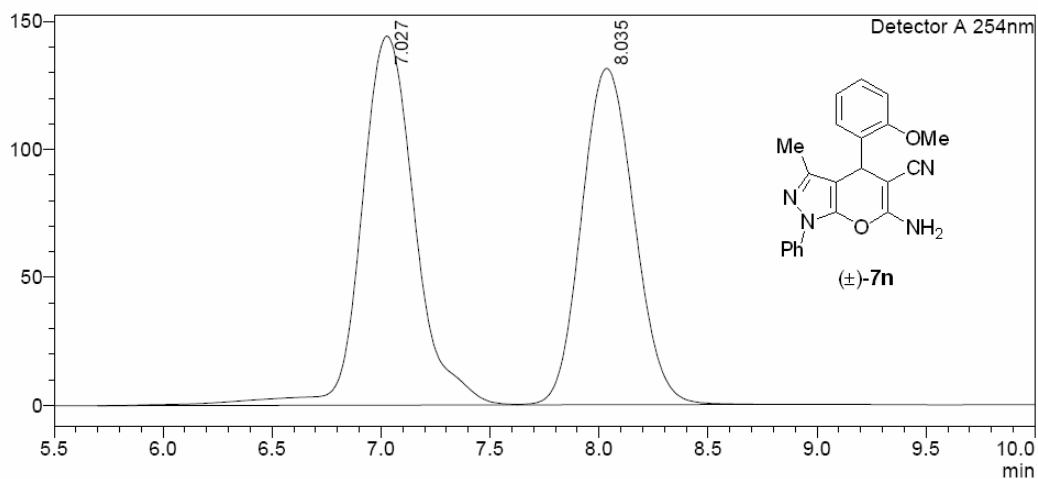

### <Peak Table>

Detector A 254nm

| Peak# | Ret. Time | Area    | Height | Height% | Area%   |
|-------|-----------|---------|--------|---------|---------|
| 1     | 7.027     | 2455546 | 144130 | 52.312  | 52.601  |
| 2     | 8.035     | 2212680 | 131388 | 47.688  | 47.399  |
| Total |           | 4668226 | 275518 | 100.000 | 100.000 |

### <Chromatogram>

mV

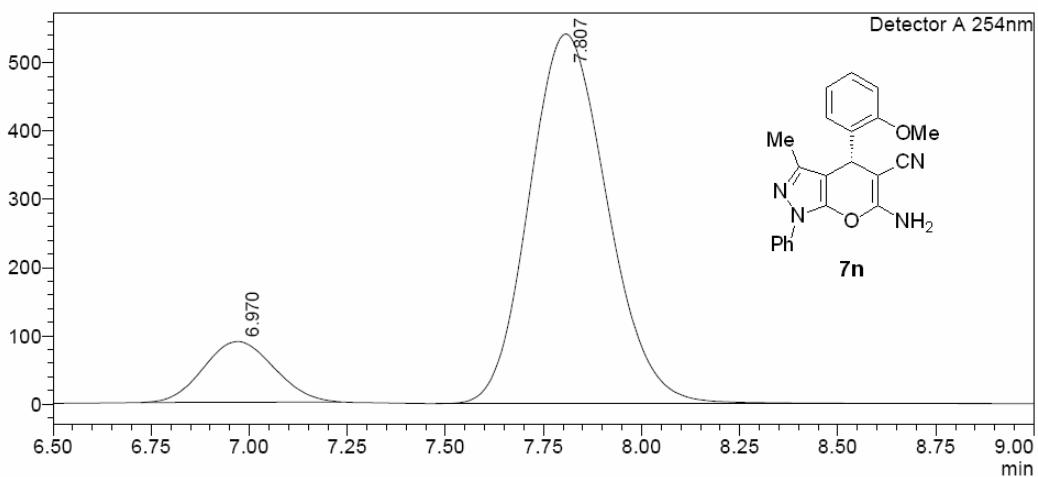

### <Peak Table>

Detector A 254nm

| Peak# | Ret. Time | Area    | Height | Height% | Area%   |
|-------|-----------|---------|--------|---------|---------|
| 1     | 6.970     | 1108892 | 88691  | 14.077  | 12.882  |
| 2     | 7.807     | 7499003 | 541337 | 85.923  | 87.118  |
| Total |           | 8607895 | 630028 | 100.000 | 100.000 |

### <Chromatogram>

mV

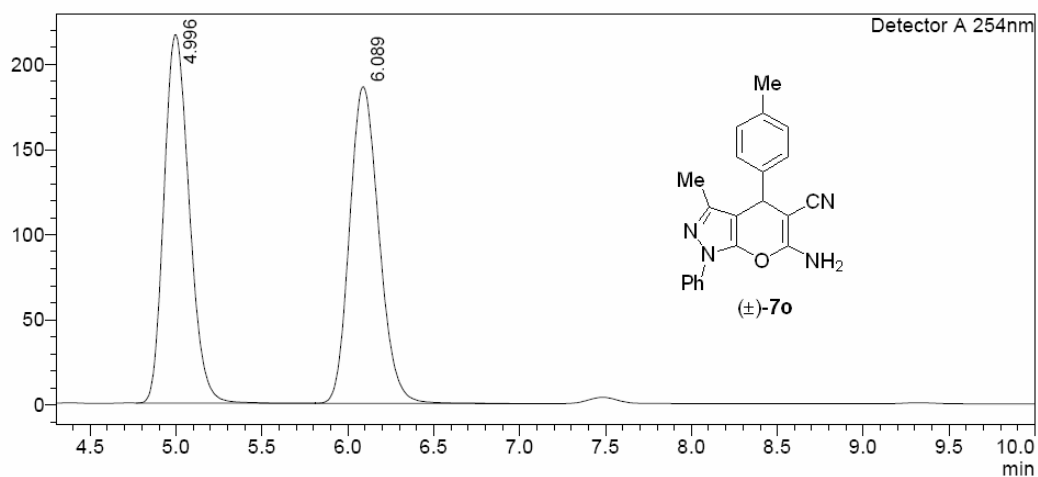

### <Peak Table>

Detector A 254nm

| Peak# | Ret. Time | Area    | Height | Height% | Area%   |
|-------|-----------|---------|--------|---------|---------|
| 1     | 4.996     | 2218565 | 216367 | 53.760  | 49.977  |
| 2     | 6.089     | 2220565 | 186101 | 46.240  | 50.023  |
| Total |           | 4439129 | 402468 | 100.000 | 100.000 |

### <Chromatogram>

mV

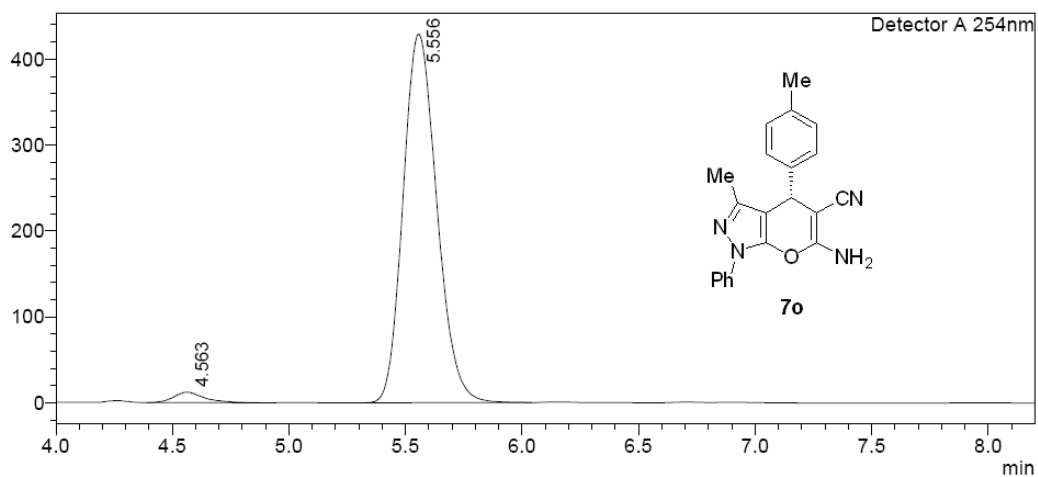

### <Peak Table>

Detector A 254nm

| Peak# | Ret. Time | Area    | Height | Height% | Area%   |
|-------|-----------|---------|--------|---------|---------|
| 1     | 4.563     | 110469  | 11950  | 2.710   | 2.493   |
| 2     | 5.556     | 4321216 | 429080 | 97.290  | 97.507  |
| Total |           | 4431684 | 441030 | 100.000 | 100.000 |

### <Chromatogram>

mV

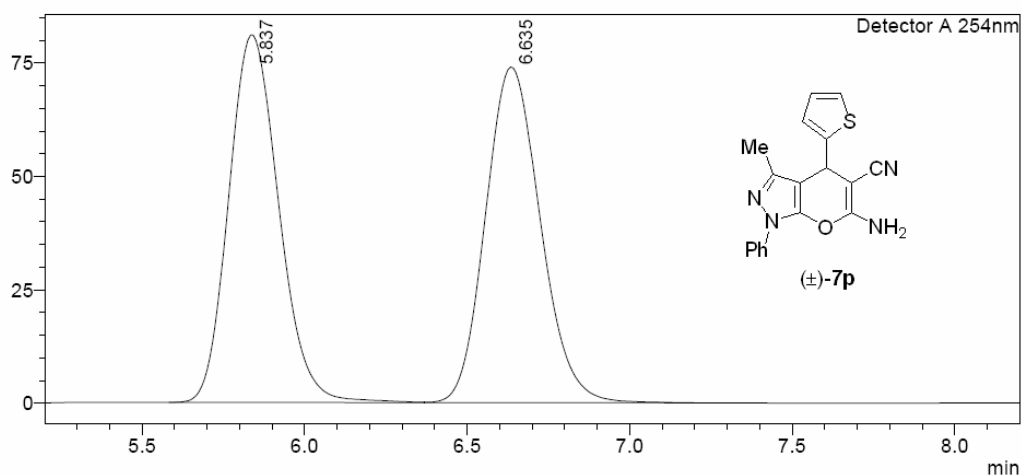

### <Peak Table>

Detector A 254nm

| Peak# | Ret. Time | Area    | Height | Height% | Area%   |
|-------|-----------|---------|--------|---------|---------|
| 1     | 5.837     | 868317  | 80923  | 52.238  | 49.957  |
| 2     | 6.635     | 869795  | 73988  | 47.762  | 50.043  |
| Total |           | 1738112 | 154911 | 100.000 | 100.000 |

### <Chromatogram>

mV

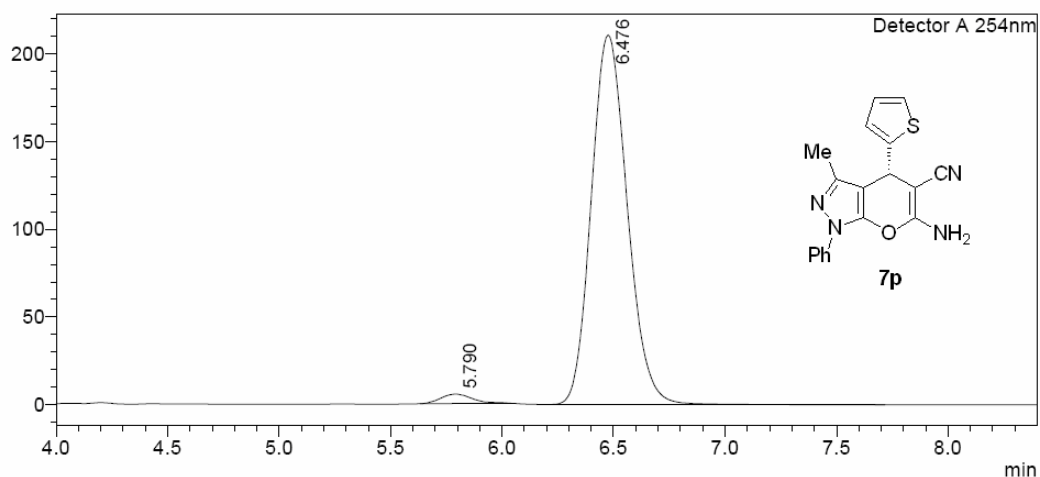

### <Peak Table>

Detector A 254nm

| Peak# | Ret. Time | Area    | Height | Height% | Area%   |
|-------|-----------|---------|--------|---------|---------|
| 1     | 5.790     | 53587   | 5350   | 2.477   | 2.215   |
| 2     | 6.476     | 2366003 | 210605 | 97.523  | 97.785  |
| Total |           | 2419590 | 215954 | 100.000 | 100.000 |

### <Chromatogram>

mV

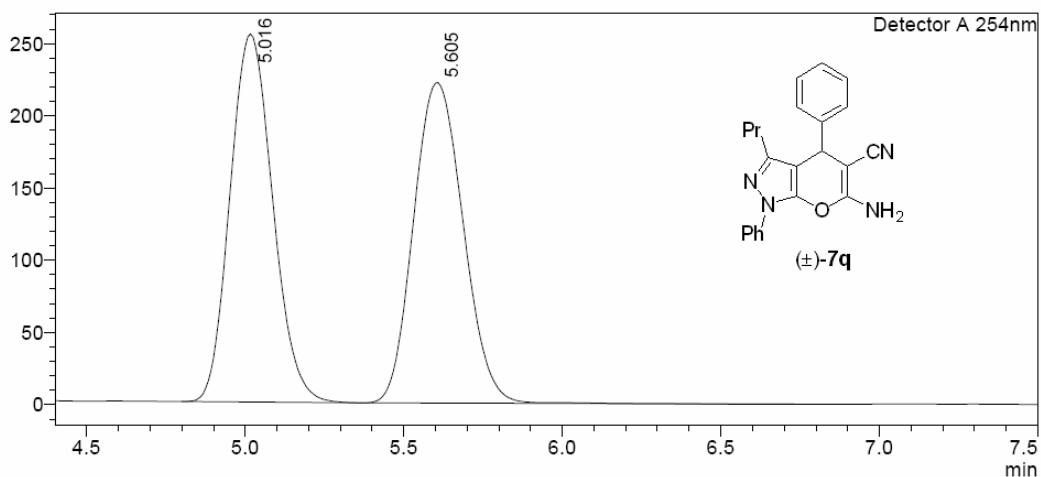

### <Peak Table>

Detector A 254nm

| Peak# | Ret. Time | Area    | Height | Height% | Area%   |
|-------|-----------|---------|--------|---------|---------|
| 1     | 5.016     | 2389151 | 254873 | 53.460  | 49.709  |
| 2     | 5.605     | 2417125 | 221879 | 46.540  | 50.291  |
| Total |           | 4806276 | 476752 | 100.000 | 100.000 |

### <Chromatogram>

mV

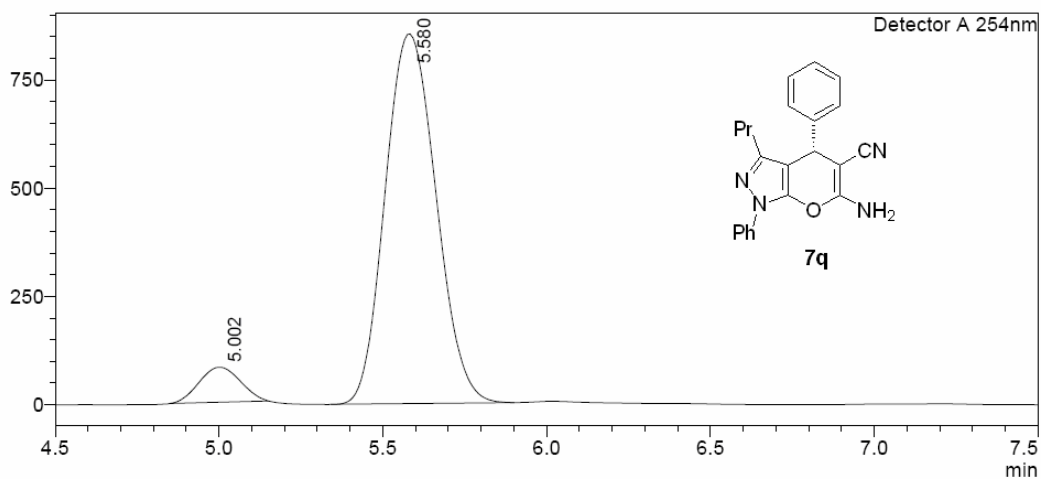

### <Peak Table>

Detector A 254nm

| Peak# | Ret. Time | Area    | Height | Height% | Area%   |
|-------|-----------|---------|--------|---------|---------|
| 1     | 5.002     | 707003  | 80796  | 8.647   | 7.111   |
| 2     | 5.580     | 9235767 | 853560 | 91.353  | 92.889  |
| Total |           | 9942770 | 934355 | 100.000 | 100.000 |

### <Chromatogram>

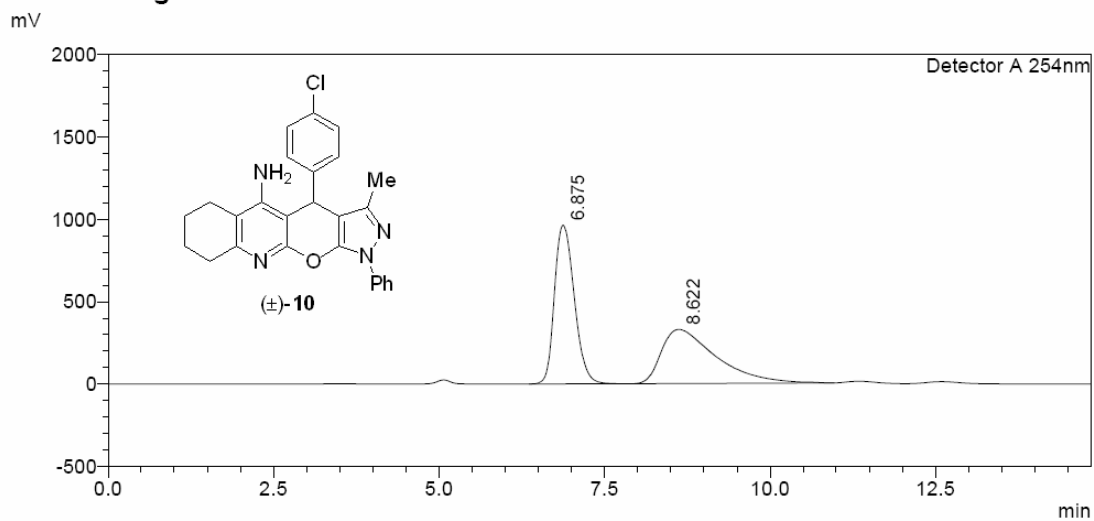

### <Peak Table>

| Detector A 254nm |           |          |         |        |         |         |
|------------------|-----------|----------|---------|--------|---------|---------|
| Peak#            | Ret. Time | Area     | Height  | Conc.  | Height% | Area%   |
| 1                | 6.875     | 20086836 | 962995  | 51.547 | 74.530  | 51.547  |
| 2                | 8.622     | 18881130 | 329093  | 48.453 | 25.470  | 48.453  |
| Total            |           | 38967966 | 1292088 |        | 100.000 | 100.000 |

### <Chromatogram>

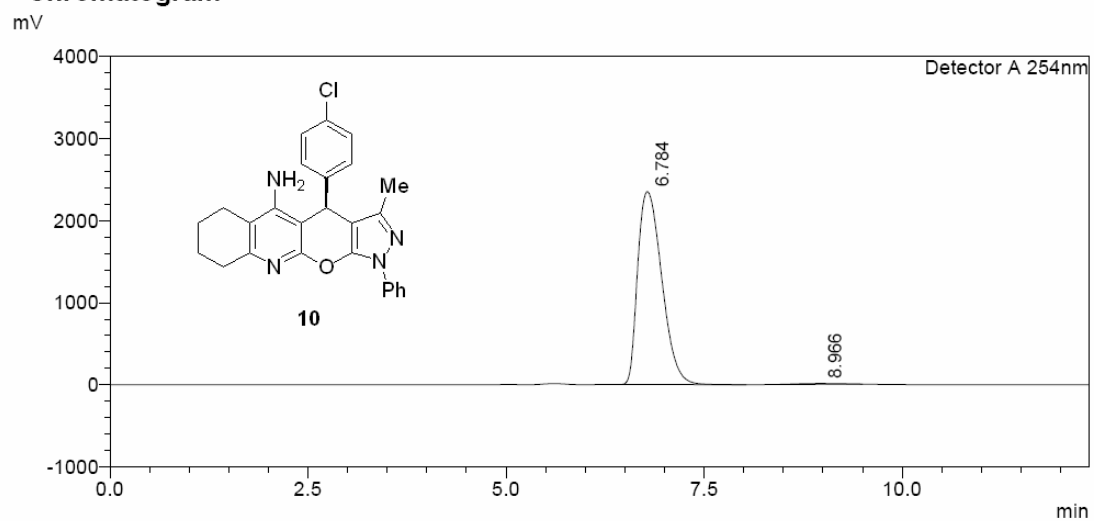

### <Peak Table>

| Detector A 254nm |           |          |         |        |         |         |
|------------------|-----------|----------|---------|--------|---------|---------|
| Peak#            | Ret. Time | Area     | Height  | Conc.  | Height% | Area%   |
| 1                | 6.784     | 49790827 | 2352420 | 99.329 | 99.627  | 99.329  |
| 2                | 8.966     | 336562   | 8797    | 0.671  | 0.373   | 0.671   |
| Total            |           | 50127389 | 2361217 |        | 100.000 | 100.000 |
